# Supplementary material for: Unusual mechanism of paramagnetic nickel-catalysed α-alkylation of amides
Source: Royal Society of Chemistry journal article supplement (doi:10.1039/d1dt01206a), 2021-01-01
Supplement: d1dt01206a1.pdf [file d1dt01206a1.pdf]

## Supporting Information

### Unusual Mechanism of Paramagnetic Nickel-Catalyzed

### $\alpha$ -Alkylation of Amides

Chao Du,<sup>a</sup> Xiaoyu Zhou,<sup>a</sup> Weikang Li,<sup>a</sup> Xiuling Wen,<sup>a</sup> Zhuofeng Ke,<sup>\*,b</sup> and Cunyuan Zhao<sup>\*,a</sup>

[a] MOE Key Laboratory of Bioinorganic and Synthetic Chemistry, School of Chemistry, Sun Yat-sen University, Guangzhou 510275, P. R. China;

[b] MOE Key Laboratory of Bioinorganic and Synthetic Chemistry, School of Chemistry, School of Materials Science and Engineering, Sun Yat-sen University, Guangzhou 510275, P. R. China; \*E-mail: [ceszhcy@mail.sysu.edu.cn](mailto:ceszhcy@mail.sysu.edu.cn); [kezhf3@mail.sysu.edu.cn](mailto:kezhf3@mail.sysu.edu.cn);

### Contents

**SI1:** 3D structure

**SI2:** Other mechanisms

**SI3:** IRC profiles

**SI4:** Further exchange of the chloride

**SI5:** Comparison of activation process

**SI6:** Comparison of two calculation methods

**SI7:** Discussion about position of chloride

**SI8:** Cartesian coordinates.

### S11: 3D structure

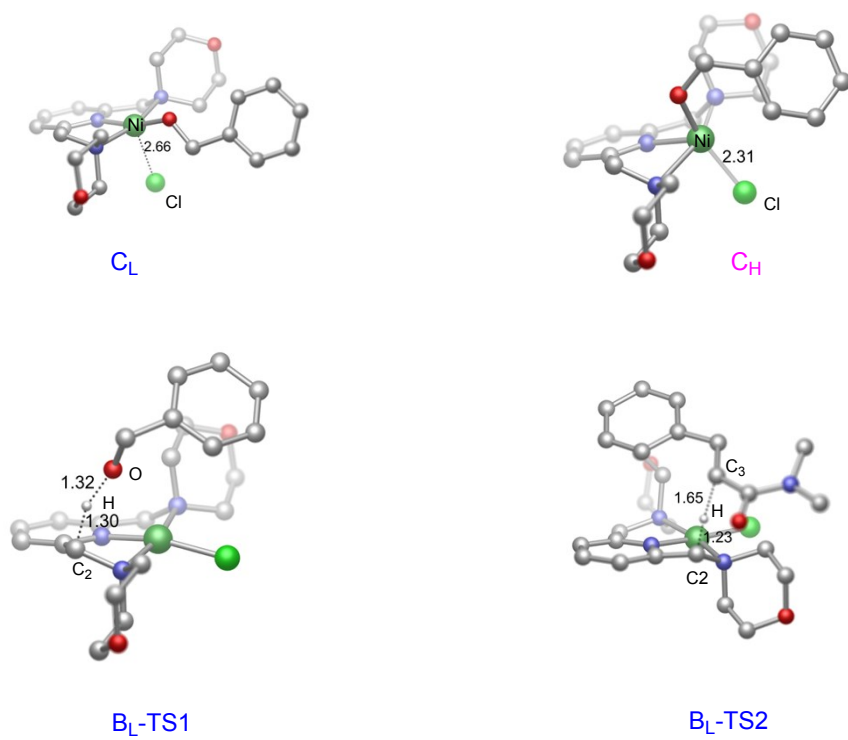

**Figure S1.** 3D structures of **C<sub>L</sub>**, **C<sub>H</sub>**, **B<sub>L</sub>-TS1** and **B<sub>L</sub>-TS2**. Bond lengths are given in Å. All C-H hydrogen atoms except the reaction site have been omitted for clarity.

### S12: Other mechanisms

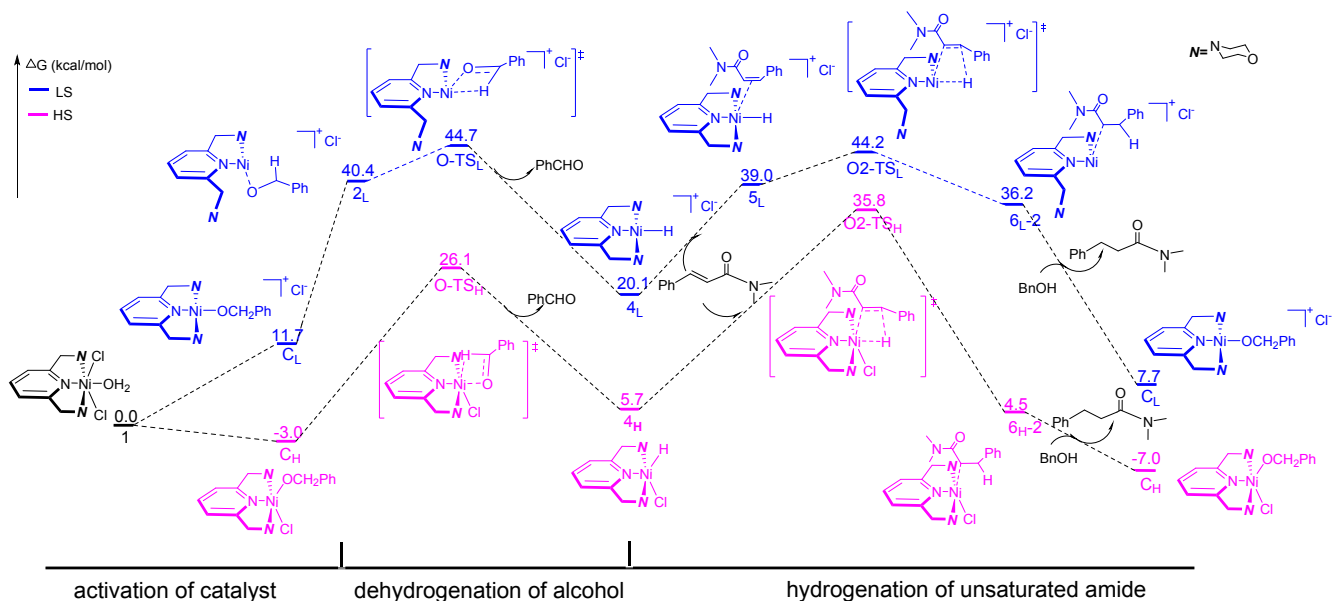

**Figure S2.** outer sphere mechanism via the second mode . The relevant free energies are given in kcal·mol<sup>-1</sup>.

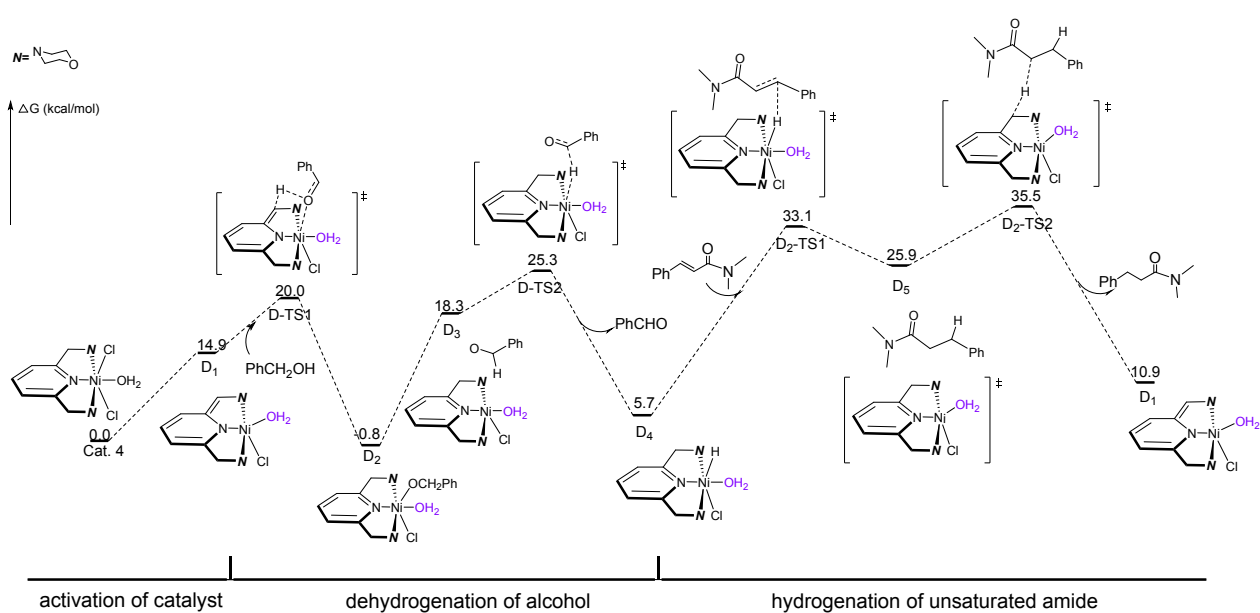

**Figure S3.** Possible general mechanism paths via H<sub>2</sub>O coordinating with Ni. The relevant free energies are given in kcal·mol<sup>-1</sup>.

**S13:** IRC profiles



**Table S1.** Comparison of activation process. The relevant free energies are given in kcal·mol<sup>-1</sup>.

| $\Delta G^\ddagger$ (kcal·mol <sup>-1</sup> ) | Optimizing structures : M06-L/def2svp<br>Single-point: M06-L/def2tzvp solvent= n-octane | Optimizing structures: M06-L/def2tzvp<br>solvent= n-octane |
|-----------------------------------------------|-----------------------------------------------------------------------------------------|------------------------------------------------------------|
| $\Delta G_H$                                  | -3.0                                                                                    | -4.9                                                       |
| $\Delta G_L$                                  | 9.7                                                                                     | 11.7                                                       |

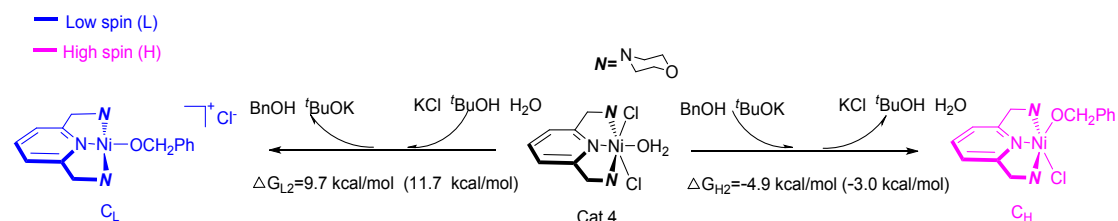**Figure S6.** The activated process of Cat.4.  $\Delta G_{L2}$  and  $\Delta G_{H2}$  were got at M06-L/def2tzvp levels and adding solvation effect of *n*-octane ( $\epsilon=1.9406$ ). Raw data is in the bracket.**S16:** Comparison of two calculation methods**Table S2.** Comparison of two calculation methods. The relevant free energies are given in kcal·mol<sup>-1</sup>.

| $\Delta G^\ddagger$ (kcal·mol <sup>-1</sup> ) | Optimizing structures : M06-L/def2svp<br>Single-point: M06-L/def2tzvp solvent= <i>n</i> -octane | Optimizing structures: M06-L/def2tzvp<br>solvent= <i>n</i> -octane |
|-----------------------------------------------|-------------------------------------------------------------------------------------------------|--------------------------------------------------------------------|
| C <sub>H</sub>                                | 0.0                                                                                             | 0.0                                                                |
| C <sub>L</sub>                                | 14.7                                                                                            | 14.6                                                               |
| O-TS <sub>H</sub>                             | 23.7                                                                                            | 23.1                                                               |
| B <sub>2</sub> -TS1                           | 24.0                                                                                            | 25.1                                                               |
| B <sub>2</sub> -TS2                           | 27.4                                                                                            | 31.2                                                               |
| O <sub>2</sub> -TS <sub>L</sub>               | 45.6                                                                                            | 44.0                                                               |

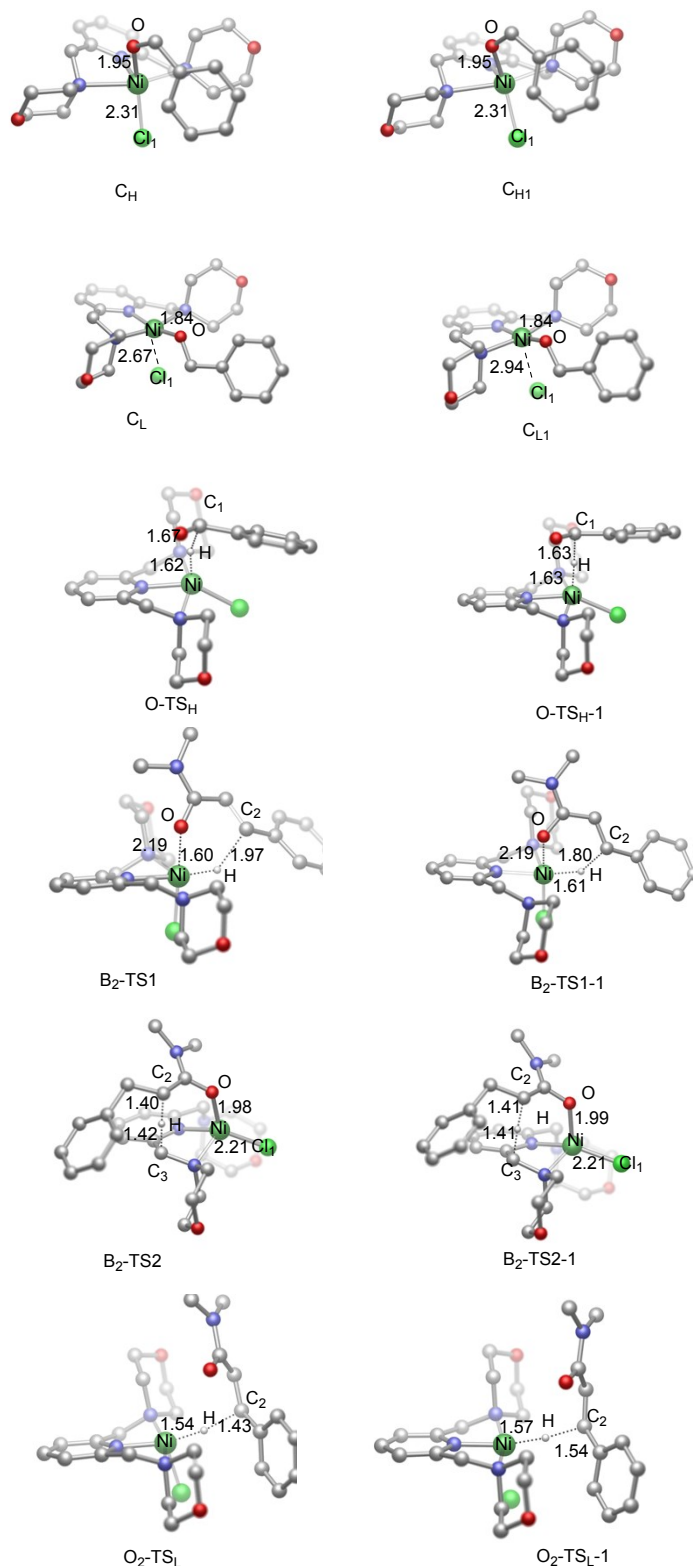

**Figure S7.** Comparison of crucial intermediates and transition states. Raw data is on the left and structures on the right were got at M06-L/def2tzvp levels and adding solvation effect of *n*-octane ( $\epsilon=1.9406$ ).

### S17: Discussion about position of chloride

The chloride position of initial structure (Cat.4) was originated from experimental article (CCDC No: 1814945). As for the  $C_L$ , We ensure the position of chloride via optimizing and taking the lowest energy. For probing into position influence, with the assistance of the Multiwfn and VMD software (Figure S8), we selected the three largest local maxima to optimize. The result (Figure S9) shows the optimal structure of  $C_{L-1}$  is same as the  $C_L$ , and both of their free energy barriers are 14.7 kcal/mol.

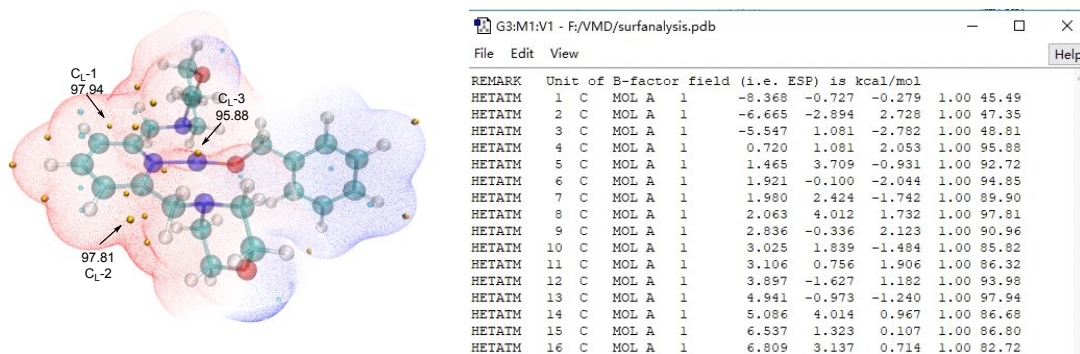

**Figure S8.** Electrostatic potential analysis via Multiwfn and VMD. Local maxima are indicated by yellow dots and Local minima are indicated by blue dots.

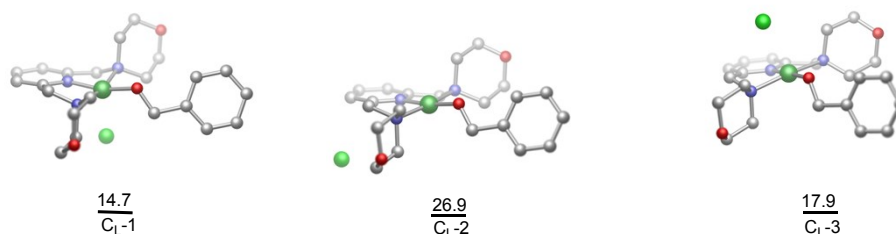

**Figure S9.** 3D structures of  $C_L$   $C_{L-1}$  and  $C_{L-2}$ . The relevant free energies are given in kcal·mol<sup>-1</sup>.

### S19: Cartesian coordinates.

#### Cat.4

|    |          |          |          |
|----|----------|----------|----------|
| Ni | -0.16737 | -0.43624 | -0.042   |
| Cl | -0.1781  | -0.71951 | 2.34393  |
| Cl | 0.2347   | -0.7187  | -2.36928 |
| O  | 4.25049  | -1.75584 | -0.60742 |
| O  | -4.24316 | -1.65867 | 0.48622  |
| O  | -0.30399 | -2.56291 | -0.01247 |
| H  | 0.3033   | -2.84582 | -0.71764 |

|   |          |          |          |
|---|----------|----------|----------|
| H | 0.09505  | -2.80544 | 0.8425   |
| N | 0.08219  | 1.58285  | -0.02004 |
| N | 2.34407  | 0.07485  | 0.44505  |
| N | -2.21928 | 0.14981  | -0.44808 |
| C | 3.07777  | -0.87317 | 1.28882  |
| H | 2.44065  | -1.13369 | 2.14387  |
| H | 4.00718  | -0.40447 | 1.67976  |
| C | 3.45679  | -2.09604 | 0.4981   |
| H | 4.02973  | -2.80095 | 1.11603  |
| H | 2.53214  | -2.61125 | 0.16234  |
| C | 3.51959  | -0.91929 | -1.4782  |
| H | 2.6353   | -1.4532  | -1.87393 |
| H | 4.17359  | -0.67676 | -2.33153 |
| C | 3.07429  | 0.3532   | -0.79284 |
| H | 3.96965  | 0.98466  | -0.56938 |
| H | 2.42015  | 0.92061  | -1.475   |
| C | 2.12511  | 1.30441  | 1.19955  |
| H | 3.07462  | 1.86101  | 1.35576  |
| H | 1.7449   | 1.01196  | 2.18847  |
| C | 1.09482  | 2.20172  | 0.59133  |
| C | 1.11307  | 3.60064  | 0.71761  |
| H | 1.95528  | 4.0956   | 1.20801  |
| C | 0.03472  | 4.33266  | 0.22793  |
| H | 0.0149   | 5.4245   | 0.32107  |
| C | -1.03683 | 3.66696  | -0.37668 |
| H | -1.89901 | 4.2104   | -0.7558  |
| C | -0.97092 | 2.27285  | -0.49278 |
| C | -2.00229 | 1.42422  | -1.15956 |
| H | -2.95089 | 1.96925  | -1.28604 |
| H | -1.62016 | 1.16441  | -2.16313 |
| C | -2.98034 | 0.37269  | 0.79632  |
| H | -3.86107 | 1.01134  | 0.56917  |
| H | -2.34035 | 0.91336  | 1.51452  |
| C | -3.45102 | -0.93332 | 1.39939  |
| H | -2.57175 | -1.52097 | 1.72272  |
| H | -4.06327 | -0.7289  | 2.28854  |
| C | -3.46308 | -1.98745 | -0.64371 |
| H | -4.1073  | -2.56857 | -1.32549 |
| H | -2.61476 | -2.62644 | -0.35204 |
| C | -2.97348 | -0.75131 | -1.34842 |
| H | -2.32068 | -1.00418 | -2.19695 |
| H | -3.85321 | -0.19385 | -1.73556 |

**C<sub>H</sub>**



|    |          |          |          |
|----|----------|----------|----------|
| Ni | 0.38044  | -0.25239 | 0.14736  |
| C  | 2.14963  | 1.77189  | -0.71717 |
| C  | 0.24485  | 2.67787  | 0.31128  |
| C  | 2.69937  | 3.03603  | -0.90517 |
| C  | 0.73281  | 3.97695  | 0.14292  |
| C  | 1.96993  | 4.14452  | -0.46989 |
| H  | 3.67273  | 3.14807  | -1.38015 |
| H  | 0.15027  | 4.83438  | 0.48728  |
| H  | 2.37798  | 5.14731  | -0.61115 |
| C  | 2.75208  | 0.4589   | -1.14135 |
| H  | 3.82904  | 0.5707   | -1.34627 |
| C  | -1.02866 | 2.27352  | 0.99342  |
| H  | -0.76893 | 1.94573  | 2.01532  |
| H  | -1.71082 | 3.13823  | 1.08483  |
| N  | 0.95401  | 1.64081  | -0.12291 |
| C  | 3.25346  | -0.42313 | 1.09836  |
| C  | 2.60292  | -1.95207 | -0.63749 |
| C  | 4.6899   | -0.86377 | 0.88936  |
| H  | 2.77311  | -1.03252 | 1.87502  |
| H  | 3.19123  | 0.62118  | 1.44491  |
| C  | 4.05525  | -2.34296 | -0.78452 |
| H  | 2.12988  | -2.61208 | 0.11315  |
| H  | 2.0265   | -2.03253 | -1.56683 |
| H  | 5.2329   | -0.82278 | 1.84206  |
| H  | 5.22126  | -0.18588 | 0.18808  |
| H  | 4.13521  | -3.39901 | -1.07609 |
| H  | 4.54042  | -1.74872 | -1.59115 |
| C  | -2.11809 | 1.43181  | -1.02055 |
| C  | -2.72471 | 0.52984  | 1.11029  |
| C  | -3.35774 | 2.30443  | -0.97785 |
| H  | -2.38409 | 0.48419  | -1.50965 |
| H  | -1.30958 | 1.8829   | -1.61495 |
| C  | -3.96128 | 1.40876  | 1.09749  |
| H  | -2.96948 | -0.44274 | 0.65941  |
| H  | -2.35506 | 0.32719  | 2.12933  |
| H  | -3.75904 | 2.4604   | -1.9876  |
| H  | -3.1298  | 3.31187  | -0.56324 |
| H  | -4.79862 | 0.89709  | 1.5912   |
| H  | -3.78818 | 2.357    | 1.65024  |
| N  | 2.44471  | -0.57046 | -0.13031 |
| N  | -1.62366 | 1.10481  | 0.32508  |
| O  | -4.37617 | 1.68936  | -0.22514 |
| O  | 4.75549  | -2.19039 | 0.42634  |
| Cl | 0.2591   | -0.53983 | 2.43784  |

|   |          |          |          |
|---|----------|----------|----------|
| C | -0.88504 | -1.44138 | -2.2601  |
| H | -0.53905 | -2.28503 | -2.9124  |
| H | -1.51134 | -0.81751 | -2.94897 |
| O | 0.18635  | -0.76014 | -1.73148 |
| H | 2.2443   | 0.13841  | -2.06823 |
| C | -1.82539 | -2.03795 | -1.23352 |
| C | -3.21225 | -2.0943  | -1.43103 |
| C | -1.32196 | -2.53945 | -0.02745 |
| C | -4.06202 | -2.62152 | -0.46515 |
| H | -3.63203 | -1.69211 | -2.36478 |
| C | -2.16008 | -3.05137 | 0.96183  |
| H | -0.23639 | -2.53316 | 0.15142  |
| C | -3.53844 | -3.10037 | 0.74068  |
| H | -5.13781 | -2.64529 | -0.63534 |
| H | -1.73877 | -3.39578 | 1.90492  |
| H | -4.20476 | -3.4991  | 1.5121   |

### C<sub>L</sub>

|    |          |          |          |
|----|----------|----------|----------|
| Ni | -0.52956 | -0.07534 | -0.49777 |
| C  | -3.26309 | -0.4761  | -0.39936 |
| C  | -1.96919 | -2.37163 | 0.0872   |
| C  | -4.44122 | -1.16605 | -0.14458 |
| C  | -3.11336 | -3.1311  | 0.30364  |
| C  | -4.35875 | -2.51463 | 0.20521  |
| H  | -5.40474 | -0.6607  | -0.23006 |
| H  | -3.02491 | -4.18171 | 0.5847   |
| H  | -5.26842 | -3.08372 | 0.40561  |
| C  | -3.14152 | 0.91568  | -0.92012 |
| H  | -3.97138 | 1.55346  | -0.57502 |
| C  | -0.57025 | -2.81863 | 0.31797  |
| H  | -0.44008 | -2.80822 | 1.41553  |
| H  | -0.39257 | -3.84211 | -0.05285 |
| N  | -2.07228 | -1.07919 | -0.26336 |
| C  | -1.78511 | 2.02911  | 0.81058  |
| C  | -1.45335 | 2.57525  | -1.51818 |
| C  | -2.60611 | 3.29252  | 0.94251  |
| H  | -0.73141 | 2.23848  | 1.04376  |
| H  | -2.09159 | 1.23285  | 1.51204  |
| C  | -2.32557 | 3.79728  | -1.31265 |
| H  | -0.412   | 2.84581  | -1.31626 |
| H  | -1.50006 | 2.19314  | -2.54805 |
| H  | -2.45454 | 3.72106  | 1.94176  |
| H  | -3.69387 | 3.09015  | 0.8484   |
| H  | -1.99862 | 4.60567  | -1.98123 |

|    |          |          |          |
|----|----------|----------|----------|
| H  | -3.38585 | 3.58176  | -1.56686 |
| C  | 0.8461   | -2.22661 | -1.61783 |
| C  | 1.5733   | -1.67705 | 0.63636  |
| C  | 1.83198  | -3.37906 | -1.59564 |
| H  | 1.31563  | -1.3277  | -2.0456  |
| H  | -0.04227 | -2.46988 | -2.22185 |
| C  | 2.49731  | -2.86784 | 0.56249  |
| H  | 2.09326  | -0.77445 | 0.2974   |
| H  | 1.18453  | -1.49387 | 1.64918  |
| H  | 2.22117  | -3.55453 | -2.60845 |
| H  | 1.33721  | -4.32148 | -1.27457 |
| H  | 3.39624  | -2.68267 | 1.16631  |
| H  | 2.01266  | -3.78113 | 0.96897  |
| N  | -1.81193 | 1.48649  | -0.58203 |
| N  | 0.39616  | -1.84217 | -0.25687 |
| O  | 2.92684  | -3.10119 | -0.7631  |
| O  | -2.22021 | 4.27463  | 0.00395  |
| Cl | -1.19317 | -0.84031 | 2.75787  |
| C  | 1.67056  | 1.81746  | -0.87928 |
| H  | 1.14562  | 2.42253  | -0.10992 |
| H  | 1.77684  | 2.49916  | -1.75879 |
| O  | 0.9808   | 0.68706  | -1.24769 |
| H  | -3.21697 | 0.88667  | -2.02102 |
| C  | 3.06463  | 1.55591  | -0.35392 |
| C  | 3.82534  | 0.48321  | -0.83265 |
| C  | 3.63274  | 2.39366  | 0.61268  |
| C  | 5.11287  | 0.2474   | -0.35337 |
| H  | 3.3842   | -0.19113 | -1.5717  |
| C  | 4.92415  | 2.16896  | 1.08804  |
| H  | 3.03828  | 3.22028  | 1.01482  |
| C  | 5.66952  | 1.09205  | 0.60786  |
| H  | 5.68274  | -0.60607 | -0.73141 |
| H  | 5.34677  | 2.83078  | 1.84871  |
| H  | 6.6784   | 0.90831  | 0.98564  |

## 2L

|    |          |          |         |
|----|----------|----------|---------|
| Ni | 0.35779  | -0.67257 | -0.1609 |
| C  | -1.73669 | -0.33595 | 1.75645 |
| C  | -0.14252 | 1.37507  | 1.58325 |
| C  | -2.3146  | 0.28721  | 2.84912 |
| C  | -0.68827 | 2.05102  | 2.67607 |
| C  | -1.7463  | 1.46382  | 3.35103 |
| H  | -3.22711 | -0.12742 | 3.28256 |
| H  | -0.31107 | 3.03738  | 2.94226 |

|   |          |          |          |
|---|----------|----------|----------|
| H | -2.1991  | 1.96954  | 4.20544  |
| C | -2.31961 | -1.50042 | 1.01709  |
| H | -1.74826 | -2.41779 | 1.23125  |
| H | -3.3505  | -1.67367 | 1.38739  |
| C | 0.97683  | 1.86663  | 0.7285   |
| H | 0.86551  | 2.9539   | 0.59002  |
| H | 1.94793  | 1.66699  | 1.21525  |
| N | -0.60563 | 0.17434  | 1.22187  |
| C | -3.03349 | -0.1237  | -0.88774 |
| C | -2.50199 | -2.43812 | -1.22803 |
| C | -4.50229 | -0.47973 | -0.9768  |
| H | -2.67593 | 0.14336  | -1.89672 |
| H | -2.86524 | 0.76406  | -0.25214 |
| C | -3.98838 | -2.73453 | -1.31339 |
| H | -2.12086 | -2.24667 | -2.24722 |
| H | -1.93491 | -3.28895 | -0.82022 |
| H | -5.07924 | 0.34082  | -1.4239  |
| H | -4.92596 | -0.65701 | 0.03437  |
| H | -4.18814 | -3.56516 | -2.00563 |
| H | -4.37719 | -3.04303 | -0.31896 |
| C | 2.35631  | 1.11882  | -1.15785 |
| C | 0.05439  | 1.70903  | -1.59564 |
| C | 2.75857  | 2.48853  | -1.671   |
| H | 2.348    | 0.41451  | -2.00478 |
| H | 3.06257  | 0.73222  | -0.40664 |
| C | 0.54792  | 3.03411  | -2.12618 |
| H | -0.00741 | 0.96654  | -2.40829 |
| H | -0.92945 | 1.8642   | -1.12127 |
| H | 3.75617  | 2.43385  | -2.12942 |
| H | 2.82804  | 3.209    | -0.82908 |
| H | -0.10531 | 3.36881  | -2.94155 |
| H | 0.47583  | 3.80599  | -1.33596 |
| N | -2.22003 | -1.25552 | -0.42057 |
| N | 0.98884  | 1.13404  | -0.57934 |
| O | 1.86343  | 2.9402   | -2.64711 |
| O | -4.7019  | -1.61844 | -1.7923  |
| C | 1.3895   | -2.41621 | -0.54677 |
| H | 1.16277  | -1.48574 | -1.32872 |
| H | 1.41734  | -3.17579 | -1.36269 |
| O | 0.3663   | -2.51505 | 0.29711  |
| C | 2.75905  | -2.12863 | 0.02153  |
| C | 3.89097  | -2.13122 | -0.79807 |
| C | 2.88421  | -1.75815 | 1.3651   |
| C | 5.1314   | -1.74663 | -0.28987 |

|    |         |          |          |
|----|---------|----------|----------|
| H  | 3.79861 | -2.42572 | -1.8492  |
| C  | 4.12331 | -1.37554 | 1.87306  |
| H  | 1.99268 | -1.78072 | 1.99828  |
| C  | 5.24855 | -1.36071 | 1.04523  |
| H  | 6.01066 | -1.74875 | -0.93842 |
| H  | 4.21538 | -1.0896  | 2.92384  |
| H  | 6.21903 | -1.05642 | 1.4441   |
| Cl | -1.8669 | 3.46202  | 0.30839  |

### I-TS<sub>L</sub>

|    |          |          |          |
|----|----------|----------|----------|
| Ni | 0.27563  | -0.70551 | -0.24831 |
| C  | -1.69076 | -0.36835 | 1.81051  |
| C  | -0.08938 | 1.32647  | 1.60433  |
| C  | -2.23356 | 0.24386  | 2.92665  |
| C  | -0.59673 | 1.99684  | 2.71999  |
| C  | -1.63884 | 1.41121  | 3.42128  |
| H  | -3.13626 | -0.166   | 3.38417  |
| H  | -0.20525 | 2.97797  | 2.98522  |
| H  | -2.062   | 1.91366  | 4.29274  |
| C  | -2.28933 | -1.5186  | 1.06335  |
| H  | -1.75584 | -2.45372 | 1.29525  |
| H  | -3.33713 | -1.65996 | 1.39204  |
| C  | 1.00504  | 1.817    | 0.71834  |
| H  | 0.90041  | 2.90692  | 0.59848  |
| H  | 1.98942  | 1.60681  | 1.17288  |
| N  | -0.57154 | 0.13468  | 1.24755  |
| C  | -2.93973 | -0.14093 | -0.86484 |
| C  | -2.42654 | -2.46321 | -1.18646 |
| C  | -4.41001 | -0.4864  | -0.96346 |
| H  | -2.5693  | 0.10721  | -1.87321 |
| H  | -2.77324 | 0.7536   | -0.23711 |
| C  | -3.91457 | -2.74556 | -1.28058 |
| H  | -2.03482 | -2.27502 | -2.20092 |
| H  | -1.87187 | -3.31853 | -0.77259 |
| H  | -4.9716  | 0.33874  | -1.42105 |
| H  | -4.84578 | -0.64961 | 0.04458  |
| H  | -4.112   | -3.57934 | -1.96945 |
| H  | -4.31434 | -3.04734 | -0.28857 |
| C  | 2.3356   | 1.11323  | -1.21113 |
| C  | 0.03377  | 1.73201  | -1.58789 |
| C  | 2.73569  | 2.49906  | -1.68052 |
| H  | 2.3116   | 0.43349  | -2.07579 |
| H  | 3.05474  | 0.70661  | -0.4839  |
| C  | 0.52312  | 3.07568  | -2.07074 |

|    |          |          |          |
|----|----------|----------|----------|
| H  | -0.03911 | 1.02383  | -2.42823 |
| H  | -0.94227 | 1.87325  | -1.09461 |
| H  | 3.72343  | 2.45266  | -2.16108 |
| H  | 2.83072  | 3.1889   | -0.81587 |
| H  | -0.14541 | 3.44522  | -2.8583  |
| H  | 0.46946  | 3.81618  | -1.24936 |
| N  | -2.13643 | -1.27811 | -0.3771  |
| N  | 0.97835  | 1.11032  | -0.60606 |
| O  | 1.82692  | 2.99858  | -2.62084 |
| O  | -4.61574 | -1.62827 | -1.77214 |
| C  | 1.34603  | -2.43717 | -0.45463 |
| H  | 0.86919  | -1.27261 | -1.49959 |
| H  | 1.38488  | -3.06749 | -1.37143 |
| O  | 0.34559  | -2.57283 | 0.33997  |
| C  | 2.68065  | -2.02228 | 0.05701  |
| C  | 3.8006   | -2.03586 | -0.78202 |
| C  | 2.81966  | -1.58432 | 1.38265  |
| C  | 5.03745  | -1.59419 | -0.31505 |
| H  | 3.69536  | -2.3864  | -1.81402 |
| C  | 4.0543   | -1.14419 | 1.84678  |
| H  | 1.94126  | -1.60097 | 2.03444  |
| C  | 5.16582  | -1.14081 | 0.99751  |
| H  | 5.90632  | -1.60586 | -0.97728 |
| H  | 4.15768  | -0.80626 | 2.88091  |
| H  | 6.1344   | -0.79416 | 1.36482  |
| Cl | -1.89216 | 3.3849   | 0.39803  |

#### 4<sub>L</sub>

|    |          |          |          |
|----|----------|----------|----------|
| Ni | 0.23589  | -0.71128 | -0.24562 |
| C  | -1.70859 | -0.32447 | 1.81451  |
| C  | -0.078   | 1.34098  | 1.59682  |
| C  | -2.24206 | 0.30433  | 2.9258   |
| C  | -0.5721  | 2.02563  | 2.70993  |
| C  | -1.62573 | 1.46396  | 3.41323  |
| H  | -3.15174 | -0.08653 | 3.38593  |
| H  | -0.16143 | 2.99996  | 2.97164  |
| H  | -2.03934 | 1.97884  | 4.28199  |
| C  | -2.31813 | -1.47366 | 1.07547  |
| H  | -1.80519 | -2.41466 | 1.32906  |
| H  | -3.37369 | -1.59106 | 1.38703  |
| C  | 1.02667  | 1.80541  | 0.70995  |
| H  | 0.93702  | 2.89496  | 0.57671  |
| H  | 2.0056   | 1.58902  | 1.17343  |
| N  | -0.5808  | 0.15555  | 1.24892  |

|    |          |          |          |
|----|----------|----------|----------|
| C  | -2.9113  | -0.11323 | -0.88596 |
| C  | -2.44208 | -2.45143 | -1.16105 |
| C  | -4.38684 | -0.4307  | -0.99804 |
| H  | -2.52197 | 0.10769  | -1.89345 |
| H  | -2.73506 | 0.78935  | -0.27229 |
| C  | -3.93437 | -2.70426 | -1.26902 |
| H  | -2.03371 | -2.28817 | -2.17292 |
| H  | -1.91065 | -3.31059 | -0.72564 |
| H  | -4.92438 | 0.39808  | -1.47726 |
| H  | -4.83875 | -0.56646 | 0.00685  |
| H  | -4.13966 | -3.54624 | -1.94545 |
| H  | -4.35264 | -2.9802  | -0.27725 |
| C  | 2.36407  | 1.04651  | -1.1924  |
| C  | 0.08632  | 1.72163  | -1.60963 |
| C  | 2.80792  | 2.41767  | -1.66525 |
| H  | 2.33429  | 0.36     | -2.05143 |
| H  | 3.06206  | 0.62848  | -0.45157 |
| C  | 0.61693  | 3.04854  | -2.09522 |
| H  | 0.01034  | 1.00879  | -2.44558 |
| H  | -0.89417 | 1.89129  | -1.13379 |
| H  | 3.80088  | 2.34131  | -2.13097 |
| H  | 2.9094   | 3.11068  | -0.80379 |
| H  | -0.029   | 3.42683  | -2.89741 |
| H  | 0.56752  | 3.79793  | -1.28158 |
| N  | -2.13714 | -1.25831 | -0.36716 |
| N  | 0.99891  | 1.08444  | -0.6069  |
| O  | 1.92731  | 2.93592  | -2.62225 |
| O  | -4.6065  | -1.5822  | -1.78908 |
| H  | 0.81008  | -1.30055 | -1.49841 |
| Cl | -1.85287 | 3.38741  | 0.35128  |

## 5<sub>L</sub>

|    |          |          |          |
|----|----------|----------|----------|
| Ni | -0.0959  | 0.16888  | -0.79771 |
| C  | 1.66645  | 0.27361  | 1.48263  |
| C  | -0.21108 | -1.07527 | 1.75517  |
| C  | 2.08625  | 0.02074  | 2.7763   |
| C  | 0.14932  | -1.36945 | 3.07351  |
| C  | 1.27051  | -0.75474 | 3.60717  |
| H  | 3.05609  | 0.38636  | 3.11961  |
| H  | -0.41533 | -2.11036 | 3.63926  |
| H  | 1.57962  | -0.97256 | 4.63072  |
| C  | 2.48622  | 0.90179  | 0.40131  |
| H  | 2.21554  | 1.95759  | 0.2295   |
| H  | 3.55105  | 0.90574  | 0.69593  |

|   |          |          |          |
|---|----------|----------|----------|
| C | -1.32018 | -1.73243 | 1.00369  |
| H | -1.37427 | -2.78572 | 1.32407  |
| H | -2.28791 | -1.25769 | 1.24155  |
| N | 0.47297  | -0.17836 | 1.04783  |
| C | 2.81353  | -1.19713 | -0.83375 |
| C | 2.77785  | 0.87713  | -2.03106 |
| C | 4.32413  | -1.17891 | -0.92323 |
| H | 2.41239  | -1.72715 | -1.71126 |
| H | 2.47487  | -1.7511  | 0.0638   |
| C | 4.29465  | 0.84244  | -2.07835 |
| H | 2.3778   | 0.38075  | -2.92883 |
| H | 2.40823  | 1.91469  | -2.03391 |
| H | 4.70355  | -2.20572 | -1.00143 |
| H | 4.77506  | -0.7443  | -0.00754 |
| H | 4.65715  | 1.31355  | -3.00325 |
| H | 4.72384  | 1.42504  | -1.23493 |
| C | -2.43821 | -1.71841 | -1.16483 |
| C | -0.25069 | -2.69282 | -1.03502 |
| C | -3.01706 | -3.11789 | -1.0788  |
| H | -2.27651 | -1.44928 | -2.22008 |
| H | -3.13399 | -0.98633 | -0.73226 |
| C | -0.89813 | -4.05489 | -0.98829 |
| H | -0.04152 | -2.40509 | -2.07753 |
| H | 0.67459  | -2.74298 | -0.43991 |
| H | -3.96489 | -3.15785 | -1.63479 |
| H | -3.25526 | -3.36973 | -0.02344 |
| H | -0.25378 | -4.78051 | -1.50105 |
| H | -0.9754  | -4.40456 | 0.05988  |
| N | 2.23262  | 0.17051  | -0.86133 |
| N | -1.12582 | -1.61713 | -0.47761 |
| O | -2.15751 | -4.07218 | -1.6372  |
| O | 4.77614  | -0.47577 | -2.06558 |
| C | -1.47737 | 1.63414  | -1.21602 |
| H | -0.24361 | 0.08125  | -2.24078 |
| H | -1.60817 | 1.61199  | -2.30572 |
| C | -2.78456 | 1.55623  | -0.5527  |
| C | -3.91765 | 1.62087  | -1.39004 |
| C | -2.99376 | 1.34034  | 0.82241  |
| C | -5.20555 | 1.49302  | -0.88217 |
| H | -3.77315 | 1.77068  | -2.46429 |
| C | -4.28457 | 1.20517  | 1.32549  |
| H | -2.13311 | 1.28272  | 1.48913  |
| C | -5.39492 | 1.279    | 0.48293  |
| H | -6.0642  | 1.55175  | -1.55513 |



|    |          |          |          |
|----|----------|----------|----------|
| H  | -4.42543 | 1.03635  | 2.39616  |
| H  | -6.403   | 1.16781  | 0.88906  |
| Cl | 1.47397  | -3.62351 | 1.52977  |
| C  | -0.23178 | 2.21572  | -0.83593 |
| H  | 0.37172  | 2.54117  | -1.68885 |
| C  | 0.01701  | 2.92039  | 0.44775  |
| O  | -0.40595 | 2.52922  | 1.52998  |
| N  | 0.8158   | 4.04839  | 0.3765   |
| C  | 1.26873  | 4.65509  | 1.60636  |
| H  | 2.36442  | 4.77324  | 1.60125  |
| H  | 0.8229   | 5.65145  | 1.75816  |
| H  | 0.97688  | 4.01576  | 2.44505  |
| C  | 1.22832  | 4.69007  | -0.84844 |
| H  | 1.42251  | 5.75283  | -0.65119 |
| H  | 2.1573   | 4.26641  | -1.27493 |
| H  | 0.44694  | 4.64788  | -1.61676 |

## I<sub>2</sub>-TS<sub>L</sub>

|    |          |          |          |
|----|----------|----------|----------|
| Ni | 0.37703  | -0.17248 | -0.6477  |
| C  | -1.7177  | -0.1929  | 1.43594  |
| C  | 0.16375  | 1.13539  | 1.78741  |
| C  | -2.14177 | 0.01625  | 2.73689  |
| C  | -0.20432 | 1.3806   | 3.11243  |
| C  | -1.33549 | 0.7569   | 3.60806  |
| H  | -3.11239 | -0.36783 | 3.05767  |
| H  | 0.3704   | 2.08509  | 3.71362  |
| H  | -1.65261 | 0.92937  | 4.63791  |
| C  | -2.5528  | -0.84303 | 0.37357  |
| H  | -2.24913 | -1.89217 | 0.20873  |
| H  | -3.59883 | -0.89674 | 0.7387   |
| C  | 1.32541  | 1.78605  | 1.11103  |
| H  | 1.34306  | 2.84592  | 1.41652  |
| H  | 2.27443  | 1.31913  | 1.42841  |
| N  | -0.52197 | 0.27925  | 1.02607  |
| C  | -2.93732 | 1.23517  | -0.86416 |
| C  | -2.96378 | -0.85357 | -2.03045 |
| C  | -4.44936 | 1.24823  | -0.92687 |
| H  | -2.54392 | 1.76002  | -1.75045 |
| H  | -2.5696  | 1.78699  | 0.02202  |
| C  | -4.48076 | -0.78536 | -2.06757 |
| H  | -2.56599 | -0.39351 | -2.95178 |
| H  | -2.62078 | -1.902   | -2.01214 |
| H  | -4.82542 | 2.2769   | -1.0015  |
| H  | -4.88735 | 0.81263  | -0.00421 |

|    |          |          |          |
|----|----------|----------|----------|
| H  | -4.87362 | -1.25548 | -2.98107 |
| H  | -4.91271 | -1.34258 | -1.20774 |
| C  | 2.57984  | 1.78229  | -0.99078 |
| C  | 0.32466  | 2.62996  | -1.01221 |
| C  | 3.07263  | 3.21491  | -0.9409  |
| H  | 2.49046  | 1.46902  | -2.04202 |
| H  | 3.28362  | 1.09677  | -0.49623 |
| C  | 0.89993  | 4.02512  | -0.99565 |
| H  | 0.1732   | 2.28509  | -2.04772 |
| H  | -0.62677 | 2.64693  | -0.45815 |
| H  | 4.04435  | 3.28799  | -1.45023 |
| H  | 3.23714  | 3.53221  | 0.11082  |
| H  | 0.24464  | 4.69784  | -1.56312 |
| H  | 0.91229  | 4.41214  | 0.04106  |
| N  | -2.39469 | -0.13609 | -0.89436 |
| N  | 1.23834  | 1.63505  | -0.37108 |
| O  | 2.18548  | 4.08137  | -1.5914  |
| O  | -4.92595 | 0.5471   | -2.06232 |
| C  | 1.46368  | -1.69064 | -1.32358 |
| H  | 0.93544  | -0.29459 | -1.96153 |
| H  | 1.57313  | -1.87329 | -2.40132 |
| C  | 2.79007  | -1.60357 | -0.67689 |
| C  | 3.9252   | -1.68465 | -1.50326 |
| C  | 2.98419  | -1.34806 | 0.69388  |
| C  | 5.20839  | -1.52978 | -0.98605 |
| H  | 3.79227  | -1.86697 | -2.57412 |
| C  | 4.26872  | -1.19825 | 1.20761  |
| H  | 2.11756  | -1.28701 | 1.35394  |
| C  | 5.38576  | -1.28447 | 0.37486  |
| H  | 6.07319  | -1.59738 | -1.65014 |
| H  | 4.39845  | -1.00875 | 2.27618  |
| H  | 6.39046  | -1.15992 | 0.78536  |
| Cl | -1.41018 | 3.68065  | 1.51923  |
| C  | 0.19574  | -2.15148 | -0.79793 |
| H  | -0.505   | -2.41682 | -1.59673 |
| C  | -0.01379 | -2.87369 | 0.48479  |
| O  | 0.42857  | -2.49762 | 1.56507  |
| N  | -0.81546 | -3.99695 | 0.41057  |
| C  | -1.2758  | -4.60492 | 1.6368   |
| H  | -2.37239 | -4.71304 | 1.62766  |
| H  | -0.8388  | -5.60558 | 1.78541  |
| H  | -0.98136 | -3.97113 | 2.47876  |
| C  | -1.24994 | -4.61818 | -0.81734 |
| H  | -1.43897 | -5.68455 | -0.63434 |

|   |          |          |          |
|---|----------|----------|----------|
| H | -2.18656 | -4.187   | -1.21876 |
| H | -0.48239 | -4.56097 | -1.59842 |

## 6L

|    |          |          |          |
|----|----------|----------|----------|
| Ni | -0.84373 | 0.1306   | -0.85721 |
| C  | -2.57685 | -1.6652  | 0.33766  |
| C  | -3.4487  | 0.48544  | -0.0074  |
| C  | -3.71226 | -2.04246 | 1.04531  |
| C  | -4.59112 | 0.18567  | 0.71529  |
| C  | -4.72965 | -1.10459 | 1.23375  |
| H  | -3.79026 | -3.048   | 1.46446  |
| H  | -5.35981 | 0.94438  | 0.87323  |
| H  | -5.62201 | -1.37146 | 1.8017   |
| C  | -1.33042 | -2.47016 | 0.14315  |
| H  | -0.74168 | -2.45552 | 1.07564  |
| H  | -1.56566 | -3.52558 | -0.07999 |
| C  | -3.09587 | 1.76708  | -0.6721  |
| H  | -3.31643 | 1.6892   | -1.75088 |
| H  | -3.69668 | 2.60366  | -0.27812 |
| N  | -2.49793 | -0.43737 | -0.19707 |
| C  | -0.9338  | -2.28626 | -2.26989 |
| C  | 0.94685  | -2.159   | -0.76802 |
| C  | -0.56704 | -3.73244 | -2.5521  |
| H  | -0.42926 | -1.63899 | -2.99023 |
| H  | -2.01763 | -2.11698 | -2.35636 |
| C  | 1.22602  | -3.61423 | -1.07022 |
| H  | 1.48186  | -1.52428 | -1.48809 |
| H  | 1.28108  | -1.87553 | 0.24281  |
| H  | -0.80568 | -3.97034 | -3.598   |
| H  | -1.15803 | -4.43283 | -1.92511 |
| H  | 2.30729  | -3.79901 | -1.01705 |
| H  | 0.74526  | -4.2819  | -0.3261  |
| C  | -1.24102 | 2.44606  | 0.82459  |
| C  | -1.18645 | 3.04563  | -1.51746 |
| C  | -1.64753 | 3.87261  | 1.12233  |
| H  | -0.15496 | 2.30528  | 0.91008  |
| H  | -1.68644 | 1.76156  | 1.56175  |
| C  | -1.65893 | 4.42941  | -1.13165 |
| H  | -0.08999 | 3.02219  | -1.52569 |
| H  | -1.50638 | 2.73685  | -2.52638 |
| H  | -1.21967 | 4.18145  | 2.0885   |
| H  | -2.75228 | 3.95114  | 1.22883  |
| H  | -1.25698 | 5.1683   | -1.83797 |
| H  | -2.7667  | 4.51544  | -1.17326 |

|    |          |          |          |
|----|----------|----------|----------|
| N  | -0.49613 | -1.844   | -0.92255 |
| N  | -1.62996 | 2.01219  | -0.55439 |
| O  | -1.18877 | 4.77644  | 0.1499   |
| O  | 0.8088   | -3.95949 | -2.37501 |
| H  | 1.63649  | 0.77848  | -0.04185 |
| Cl | 0.61956  | 0.64835  | -2.51404 |
| C  | 1.98261  | 0.03344  | 1.95937  |
| H  | 2.78792  | -0.2418  | 2.64231  |
| C  | 2.2931   | 0.96684  | 0.82437  |
| H  | 2.06024  | 2.01813  | 1.08446  |
| C  | 3.74022  | 0.89748  | 0.36743  |
| C  | 4.09606  | 0.61826  | -0.95638 |
| C  | 4.77871  | 1.12715  | 1.28951  |
| C  | 5.44243  | 0.56523  | -1.34345 |
| H  | 3.29212  | 0.46649  | -1.68252 |
| C  | 6.12138  | 1.07468  | 0.91046  |
| H  | 4.52157  | 1.35551  | 2.32858  |
| C  | 6.45985  | 0.78935  | -0.41213 |
| H  | 5.6957   | 0.34925  | -2.38446 |
| H  | 6.90585  | 1.26041  | 1.65081  |
| H  | 7.50985  | 0.75105  | -0.71577 |
| O  | -0.32015 | -0.02058 | 1.47182  |
| C  | 0.67947  | -0.41536 | 2.16945  |
| N  | 0.41533  | -1.41062 | 3.14649  |
| C  | -0.89253 | -1.49726 | 3.74924  |
| H  | -0.9243  | -1.12028 | 4.79504  |
| H  | -1.59006 | -0.88872 | 3.15733  |
| H  | -1.28533 | -2.53553 | 3.77236  |
| C  | 1.53257  | -1.97001 | 3.88043  |
| H  | 1.1959   | -2.82289 | 4.48205  |
| H  | 2.31887  | -2.33199 | 3.19662  |
| H  | 2.02733  | -1.25224 | 4.57171  |

## 6<sub>L</sub>-2

|    |          |          |          |
|----|----------|----------|----------|
| Ni | -0.41948 | 0.18241  | -0.53903 |
| C  | 1.77338  | 0.19751  | 1.39287  |
| C  | -0.07518 | -1.17621 | 1.77801  |
| C  | 2.22206  | -0.01063 | 2.68632  |
| C  | 0.32521  | -1.41824 | 3.09343  |
| C  | 1.45187  | -0.77359 | 3.57056  |
| H  | 3.1879   | 0.39855  | 2.99017  |
| H  | -0.22787 | -2.13415 | 3.70126  |
| H  | 1.79177  | -0.94078 | 4.59394  |
| C  | 2.58462  | 0.88712  | 0.33626  |

|   |          |          |          |
|---|----------|----------|----------|
| H | 2.21183  | 1.91293  | 0.16183  |
| H | 3.61653  | 1.01237  | 0.72771  |
| C | -1.25579 | -1.83367 | 1.13913  |
| H | -1.24983 | -2.89817 | 1.42961  |
| H | -2.19568 | -1.38106 | 1.50245  |
| N | 0.58093  | -0.30403 | 1.00208  |
| C | 3.05225  | -1.1912  | -0.88389 |
| C | 3.07545  | 0.89803  | -2.04962 |
| C | 4.56548  | -1.19063 | -0.92565 |
| H | 2.67746  | -1.72557 | -1.77334 |
| H | 2.67673  | -1.74534 | -0.00322 |
| C | 4.59354  | 0.84516  | -2.06415 |
| H | 2.69962  | 0.43839  | -2.98114 |
| H | 2.72036  | 1.94284  | -2.03305 |
| H | 4.95607  | -2.21443 | -0.99468 |
| H | 4.98481  | -0.747   | 0.00221  |
| H | 4.99874  | 1.32105  | -2.96941 |
| H | 5.00672  | 1.40129  | -1.19438 |
| C | -2.57753 | -1.80117 | -0.92661 |
| C | -0.30017 | -2.58248 | -1.04143 |
| C | -3.03133 | -3.24771 | -0.93026 |
| H | -2.52288 | -1.44724 | -1.96918 |
| H | -3.28552 | -1.15212 | -0.38869 |
| C | -0.83798 | -3.99252 | -1.07358 |
| H | -0.182   | -2.18749 | -2.06463 |
| H | 0.66522  | -2.59142 | -0.51223 |
| H | -4.01445 | -3.32874 | -1.41594 |
| H | -3.154   | -3.61426 | 0.11097  |
| H | -0.18166 | -4.62614 | -1.68316 |
| H | -0.81727 | -4.41793 | -0.05229 |
| N | 2.49826  | 0.17085  | -0.92745 |
| N | -1.22621 | -1.64618 | -0.33711 |
| O | -2.13633 | -4.05498 | -1.64253 |
| O | 5.04876  | -0.48467 | -2.05572 |
| C | -1.51506 | 1.67032  | -1.41074 |
| H | -1.33262 | 0.5515   | -1.81924 |
| H | -1.59912 | 2.0701   | -2.43786 |
| C | -2.86612 | 1.68602  | -0.75087 |
| C | -3.99813 | 1.90359  | -1.54626 |
| C | -3.04944 | 1.34051  | 0.59739  |
| C | -5.28199 | 1.78026  | -1.01693 |
| H | -3.87182 | 2.16005  | -2.60276 |
| C | -4.3323  | 1.23198  | 1.1279   |
| H | -2.17476 | 1.18177  | 1.23168  |

|    |          |          |          |
|----|----------|----------|----------|
| C  | -5.4528  | 1.44286  | 0.32402  |
| H  | -6.15097 | 1.94838  | -1.65708 |
| H  | -4.45662 | 0.97471  | 2.18278  |
| H  | -6.45728 | 1.34581  | 0.74254  |
| Cl | 1.46081  | -3.71112 | 1.44782  |
| C  | -0.22196 | 2.08483  | -0.77936 |
| H  | 0.52414  | 2.3206   | -1.54886 |
| C  | -0.08516 | 2.8899   | 0.46301  |
| O  | -0.56262 | 2.55757  | 1.5438   |
| N  | 0.721    | 4.00992  | 0.37439  |
| C  | 1.15833  | 4.65222  | 1.5908   |
| H  | 2.25083  | 4.79602  | 1.57817  |
| H  | 0.68944  | 5.64094  | 1.72525  |
| H  | 0.88417  | 4.0234   | 2.44354  |
| C  | 1.16406  | 4.61437  | -0.8572  |
| H  | 1.22685  | 5.70481  | -0.72689 |
| H  | 2.16517  | 4.26823  | -1.17832 |
| H  | 0.45713  | 4.43315  | -1.67493 |

### I-TS<sub>H</sub>

|    |          |          |          |
|----|----------|----------|----------|
| Ni | 0.44272  | 0.13967  | -0.25131 |
| C  | 2.81349  | -1.38143 | 0.42036  |
| C  | 1.08558  | -2.68491 | -0.46321 |
| C  | 3.63957  | -2.49828 | 0.54263  |
| C  | 1.84672  | -3.84644 | -0.34558 |
| C  | 3.14031  | -3.74416 | 0.16563  |
| H  | 4.6534   | -2.3922  | 0.93477  |
| H  | 1.43591  | -4.8093  | -0.65699 |
| H  | 3.76278  | -4.63618 | 0.26459  |
| C  | 3.17785  | 0.00957  | 0.84783  |
| H  | 2.81053  | 0.13695  | 1.88117  |
| H  | 4.27735  | 0.12672  | 0.86613  |
| C  | -0.26678 | -2.59692 | -1.10227 |
| H  | -0.10803 | -2.22471 | -2.13164 |
| H  | -0.7206  | -3.60265 | -1.18256 |
| N  | 1.57634  | -1.5064  | -0.06907 |
| C  | 3.08381  | 1.19335  | -1.30192 |
| C  | 2.41898  | 2.33018  | 0.70153  |
| C  | 4.39875  | 1.94606  | -1.25037 |
| H  | 2.34857  | 1.74882  | -1.90456 |
| H  | 3.19702  | 0.20712  | -1.77909 |
| C  | 3.75786  | 3.03316  | 0.71122  |
| H  | 1.697    | 2.93691  | 0.1362   |
| H  | 1.99917  | 2.18128  | 1.70657  |

|    |          |          |          |
|----|----------|----------|----------|
| H  | 4.76381  | 2.15172  | -2.26669 |
| H  | 5.18173  | 1.33777  | -0.74803 |
| H  | 3.66352  | 4.04147  | 1.13753  |
| H  | 4.49322  | 2.48546  | 1.33883  |
| C  | -1.62845 | -2.07459 | 0.86184  |
| C  | -2.24683 | -1.19029 | -1.2802  |
| C  | -2.72473 | -3.10804 | 0.7104   |
| H  | -2.01702 | -1.19652 | 1.39772  |
| H  | -0.78674 | -2.44112 | 1.46834  |
| C  | -3.32269 | -2.2526  | -1.37405 |
| H  | -2.6864  | -0.29347 | -0.81878 |
| H  | -1.85573 | -0.89303 | -2.26583 |
| H  | -3.1556  | -3.3571  | 1.69032  |
| H  | -2.3309  | -4.0561  | 0.28449  |
| H  | -4.19286 | -1.87374 | -1.92873 |
| H  | -2.9544  | -3.14663 | -1.92168 |
| N  | 2.48974  | 1.01947  | 0.03353  |
| N  | -1.11885 | -1.60713 | -0.43744 |
| O  | -3.77986 | -2.62135 | -0.0916  |
| O  | 4.26055  | 3.18837  | -0.60046 |
| C  | -1.39852 | 2.5207   | -0.89579 |
| H  | -1.52417 | 1.81029  | -1.71288 |
| H  | -1.33492 | 3.59385  | -1.19778 |
| O  | -0.33913 | 1.98315  | -0.58475 |
| C  | -2.6942  | 2.24183  | -0.29176 |
| C  | -3.86487 | 2.73333  | -0.8937  |
| C  | -2.78186 | 1.46381  | 0.87811  |
| C  | -5.10966 | 2.42415  | -0.35739 |
| H  | -3.78714 | 3.34689  | -1.79671 |
| C  | -4.02951 | 1.16481  | 1.41082  |
| H  | -1.8561  | 1.1109   | 1.35221  |
| C  | -5.19214 | 1.63515  | 0.79283  |
| H  | -6.02023 | 2.79603  | -0.83282 |
| H  | -4.09965 | 0.55887  | 2.31767  |
| H  | -6.17041 | 1.39169  | 1.21469  |
| Cl | 0.19953  | 0.29076  | 2.15556  |

#### 4<sub>H</sub>

|    |          |          |          |
|----|----------|----------|----------|
| Ni | -0.29357 | -1.11925 | -0.69607 |
| C  | -0.08883 | -0.99196 | 2.16557  |
| C  | -2.30219 | -1.07657 | 1.41476  |
| C  | -0.49632 | -0.97339 | 3.49717  |
| C  | -2.78358 | -1.03089 | 2.7232   |
| C  | -1.86519 | -0.99293 | 3.77222  |

|    |          |          |          |
|----|----------|----------|----------|
| H  | 0.24199  | -0.93926 | 4.3015   |
| H  | -3.85887 | -1.03774 | 2.91458  |
| H  | -2.2155  | -0.97542 | 4.80673  |
| C  | 1.32325  | -0.85246 | 1.6817   |
| H  | 2.04098  | -1.0679  | 2.49435  |
| C  | -3.14877 | -1.20516 | 0.18105  |
| H  | -3.21842 | -2.28099 | -0.05816 |
| H  | -4.17375 | -0.83949 | 0.38141  |
| N  | -0.98747 | -1.05454 | 1.17864  |
| C  | 1.73946  | -3.06377 | 0.70678  |
| C  | 2.71555  | -1.11839 | -0.30174 |
| C  | 3.08827  | -3.36817 | 1.32885  |
| H  | 1.64689  | -3.57564 | -0.2622  |
| H  | 0.9046   | -3.42947 | 1.32357  |
| C  | 4.02867  | -1.46302 | 0.36524  |
| H  | 2.67275  | -1.57364 | -1.30323 |
| H  | 2.58546  | -0.03503 | -0.43077 |
| H  | 3.23706  | -4.45443 | 1.40202  |
| H  | 3.1508   | -2.96729 | 2.36349  |
| H  | 4.87776  | -1.1422  | -0.25543 |
| H  | 4.13018  | -0.93352 | 1.33682  |
| C  | -2.58044 | 0.91208  | -0.90631 |
| C  | -3.02373 | -1.01701 | -2.25943 |
| C  | -3.96158 | 1.42955  | -1.24811 |
| H  | -1.84046 | 1.30432  | -1.62163 |
| H  | -2.24653 | 1.25042  | 0.08753  |
| C  | -4.39594 | -0.45194 | -2.56044 |
| H  | -2.31843 | -0.66183 | -3.03105 |
| H  | -2.99881 | -2.11666 | -2.27515 |
| H  | -3.95661 | 2.52743  | -1.30038 |
| H  | -4.69825 | 1.1517   | -0.46364 |
| H  | -4.7237  | -0.7337  | -3.57094 |
| H  | -5.14737 | -0.86104 | -1.85168 |
| N  | 1.55879  | -1.62298 | 0.45494  |
| N  | -2.50487 | -0.55682 | -0.96683 |
| O  | -4.39048 | 0.95791  | -2.50715 |
| O  | 4.14672  | -2.85781 | 0.54976  |
| Cl | -1.08131 | -3.48426 | -1.02072 |
| H  | 0.19151  | 0.42448  | -0.82339 |
| H  | 1.46156  | 0.20748  | 1.40087  |

### I<sub>2</sub>-TS<sub>H</sub>

|    |         |          |          |
|----|---------|----------|----------|
| Ni | 0.03669 | -0.15253 | -0.64052 |
| C  | -0.0365 | -2.54116 | 1.12698  |



|    |          |          |          |
|----|----------|----------|----------|
| C  | -2.03314 | -2.13156 | -0.00147 |
| C  | -0.59753 | -3.62216 | 1.80587  |
| C  | -2.66799 | -3.1777  | 0.66538  |
| C  | -1.93555 | -3.92968 | 1.58095  |
| H  | 0.0058   | -4.20118 | 2.50798  |
| H  | -3.71665 | -3.40243 | 0.45949  |
| H  | -2.40717 | -4.75822 | 2.11397  |
| C  | 1.37282  | -2.07593 | 1.34807  |
| H  | 1.98131  | -2.91544 | 1.73296  |
| C  | -2.67597 | -1.32316 | -1.08723 |
| H  | -2.31403 | -1.73019 | -2.04704 |
| H  | -3.77338 | -1.44408 | -1.05406 |
| N  | -0.7546  | -1.83094 | 0.25496  |
| C  | 2.28378  | -2.46948 | -0.87501 |
| C  | 3.14671  | -0.6574  | 0.41296  |
| C  | 3.51085  | -3.27381 | -0.50376 |
| H  | 2.45881  | -1.93756 | -1.81987 |
| H  | 1.40796  | -3.10787 | -1.05748 |
| C  | 4.3592   | -1.5078  | 0.73933  |
| H  | 3.35157  | -0.06178 | -0.49228 |
| H  | 2.95626  | 0.0537   | 1.22985  |
| H  | 3.77735  | -3.95102 | -1.32651 |
| H  | 3.33045  | -3.91202 | 0.38749  |
| H  | 5.25032  | -0.87283 | 0.84294  |
| H  | 4.21978  | -2.02736 | 1.71244  |
| C  | -3.00012 | 0.82063  | -0.00463 |
| C  | -2.38414 | 0.79014  | -2.31937 |
| C  | -4.42748 | 1.12463  | -0.42425 |
| H  | -2.48218 | 1.7771   | 0.16317  |
| H  | -2.97234 | 0.24992  | 0.93684  |
| C  | -3.82469 | 1.08238  | -2.6681  |
| H  | -1.83405 | 1.74124  | -2.22074 |
| H  | -1.86739 | 0.19924  | -3.08864 |
| H  | -4.91554 | 1.7603   | 0.32854  |
| H  | -5.02962 | 0.19393  | -0.49222 |
| H  | -3.88524 | 1.68598  | -3.58397 |
| H  | -4.38135 | 0.14156  | -2.86371 |
| N  | 1.93809  | -1.45338 | 0.14458  |
| N  | -2.24749 | 0.08309  | -1.0317  |
| O  | -4.46467 | 1.82025  | -1.64538 |
| O  | 4.62631  | -2.4391  | -0.27836 |
| Cl | 0.02087  | -1.43077 | -2.78321 |
| H  | 0.49324  | 0.90929  | -1.7207  |
| H  | 1.34279  | -1.32892 | 2.15917  |

|   |          |          |          |
|---|----------|----------|----------|
| C | -0.81953 | 0.90405  | 2.18493  |
| O | -1.04059 | -0.15353 | 2.78051  |
| C | 0.25284  | 0.98395  | 1.17996  |
| H | 1.1648   | 0.54145  | 1.58647  |
| C | 0.43213  | 1.81366  | 0.04995  |
| H | -0.44118 | 2.38624  | -0.2968  |
| C | 1.72768  | 2.50459  | -0.20856 |
| C | 2.12148  | 2.9077   | -1.49284 |
| C | 2.56067  | 2.83859  | 0.86991  |
| C | 3.30283  | 3.61074  | -1.69361 |
| H | 1.49447  | 2.62787  | -2.34495 |
| C | 3.75477  | 3.53236  | 0.67076  |
| H | 2.25802  | 2.55399  | 1.88267  |
| C | 4.13174  | 3.92051  | -0.61181 |
| H | 3.59007  | 3.90847  | -2.70496 |
| H | 4.38994  | 3.77426  | 1.52665  |
| H | 5.06805  | 4.46019  | -0.77232 |
| N | -1.53932 | 2.0464   | 2.50308  |
| C | -1.22598 | 3.38235  | 2.06685  |
| H | -1.82238 | 3.71091  | 1.1934   |
| H | -1.43811 | 4.09074  | 2.88204  |
| H | -0.16425 | 3.48622  | 1.81475  |
| C | -2.69687 | 1.92432  | 3.35232  |
| H | -2.57792 | 2.50066  | 4.28467  |
| H | -3.60337 | 2.29993  | 2.84471  |
| H | -2.83414 | 0.87     | 3.61309  |

## 6<sub>H</sub>-2

|    |          |          |          |
|----|----------|----------|----------|
| Ni | -0.04081 | -0.36036 | -0.58967 |
| C  | -0.24116 | -2.56408 | 1.23487  |
| C  | -2.19634 | -2.11698 | 0.01908  |
| C  | -0.88624 | -3.55639 | 1.96994  |
| C  | -2.90827 | -3.07124 | 0.74105  |
| C  | -2.23657 | -3.79582 | 1.72668  |
| H  | -0.34259 | -4.11718 | 2.73274  |
| H  | -3.96407 | -3.25146 | 0.52812  |
| H  | -2.76925 | -4.5549  | 2.30382  |
| C  | 1.17613  | -2.11791 | 1.45124  |
| H  | 1.75714  | -2.91826 | 1.94701  |
| C  | -2.72694 | -1.32052 | -1.14138 |
| H  | -2.30154 | -1.7585  | -2.06215 |
| H  | -3.82699 | -1.41305 | -1.20098 |
| N  | -0.90773 | -1.88626 | 0.29594  |
| C  | 2.08506  | -2.71694 | -0.74612 |

|    |          |          |          |
|----|----------|----------|----------|
| C  | 3.00737  | -0.84162 | 0.40916  |
| C  | 3.30027  | -3.5217  | -0.33725 |
| H  | 2.25933  | -2.25208 | -1.72571 |
| H  | 1.19266  | -3.34929 | -0.86771 |
| C  | 4.2059   | -1.69635 | 0.767    |
| H  | 3.20664  | -0.30396 | -0.53377 |
| H  | 2.84283  | -0.08305 | 1.1873   |
| H  | 3.53733  | -4.26769 | -1.10828 |
| H  | 3.12032  | -4.08182 | 0.60604  |
| H  | 5.11275  | -1.07789 | 0.81779  |
| H  | 4.06885  | -2.15505 | 1.77034  |
| C  | -2.92069 | 0.8568   | -0.04702 |
| C  | -2.3944  | 0.7779   | -2.38175 |
| C  | -4.33855 | 1.24659  | -0.41622 |
| H  | -2.33449 | 1.77635  | 0.09263  |
| H  | -2.87914 | 0.29529  | 0.89985  |
| C  | -3.82315 | 1.17496  | -2.67591 |
| H  | -1.77838 | 1.68953  | -2.31671 |
| H  | -1.95757 | 0.15782  | -3.17504 |
| H  | -4.76436 | 1.90311  | 0.35586  |
| H  | -4.99631 | 0.35291  | -0.47531 |
| H  | -3.87267 | 1.77992  | -3.5916  |
| H  | -4.45405 | 0.27704  | -2.8482  |
| N  | 1.77899  | -1.62809 | 0.20532  |
| N  | -2.25136 | 0.07033  | -1.0951  |
| O  | -4.36899 | 1.95457  | -1.63296 |
| O  | 4.43446  | -2.69492 | -0.19609 |
| Cl | 0.25455  | -1.02482 | -2.77995 |
| H  | 0.16391  | 1.84296  | -1.16141 |
| H  | 1.11433  | -1.27086 | 2.15855  |
| C  | -0.67853 | 1.04436  | 2.04396  |
| O  | -0.82867 | -0.01778 | 2.66536  |
| C  | 0.23515  | 1.1054   | 0.90032  |
| H  | 1.19709  | 0.70778  | 1.23969  |
| C  | 0.41038  | 2.20366  | -0.13209 |
| H  | -0.32322 | 3.01462  | -0.01478 |
| C  | 1.80038  | 2.77742  | -0.23448 |
| C  | 2.31191  | 3.16497  | -1.48068 |
| C  | 2.63113  | 2.90545  | 0.88653  |
| C  | 3.60322  | 3.67093  | -1.60456 |
| H  | 1.68708  | 3.04882  | -2.37155 |
| C  | 3.92653  | 3.40708  | 0.7668   |
| H  | 2.25729  | 2.59374  | 1.86682  |
| C  | 4.41882  | 3.79131  | -0.47972 |

|   |          |         |          |
|---|----------|---------|----------|
| H | 3.98195  | 3.95904 | -2.58843 |
| H | 4.55685  | 3.4974  | 1.65538  |
| H | 5.43645  | 4.17658 | -0.57438 |
| N | -1.43663 | 2.14803 | 2.43406  |
| C | -1.06654 | 3.52318 | 2.22308  |
| H | -1.65856 | 4.03455 | 1.43245  |
| H | -1.22182 | 4.09631 | 3.15919  |
| H | 0.00082  | 3.61217 | 1.9755   |
| C | -2.55574 | 1.94279 | 3.31738  |
| H | -2.3683  | 2.3449  | 4.32843  |
| H | -3.45959 | 2.44359 | 2.92765  |
| H | -2.74192 | 0.86898 | 3.41633  |

### O-TS<sub>L</sub>

|    |          |          |          |
|----|----------|----------|----------|
| C  | 1.45215  | -1.76569 | -0.90671 |
| H  | 0.91014  | -2.64333 | -0.44522 |
| C  | 2.87491  | -1.74128 | -0.38897 |
| C  | 3.13872  | -1.75626 | 0.9871   |
| C  | 3.93471  | -1.70289 | -1.29827 |
| C  | 4.45412  | -1.75048 | 1.44381  |
| H  | 2.29944  | -1.72281 | 1.6938   |
| C  | 5.25036  | -1.70283 | -0.83858 |
| H  | 3.69571  | -1.67451 | -2.36503 |
| C  | 5.51199  | -1.72978 | 0.53219  |
| H  | 4.65782  | -1.75252 | 2.51786  |
| H  | 6.07891  | -1.67961 | -1.55129 |
| H  | 6.54405  | -1.72747 | 0.89247  |
| H  | 0.96297  | -0.91246 | -0.0478  |
| O  | 1.21174  | -1.5025  | -2.12512 |
| Ni | -0.46736 | 0.14076  | 0.24359  |
| C  | -1.80325 | 2.47071  | -0.43366 |
| C  | -3.15448 | 0.66329  | 0.26159  |
| C  | -2.91515 | 3.29635  | -0.55272 |
| C  | -4.30269 | 1.43204  | 0.13442  |
| C  | -4.17779 | 2.76824  | -0.26495 |
| H  | -2.80032 | 4.33163  | -0.88004 |
| H  | -5.28082 | 0.99847  | 0.3511   |
| H  | -5.06554 | 3.39547  | -0.36175 |
| C  | -0.39707 | 2.78458  | -0.83617 |
| H  | -0.14401 | 3.82904  | -0.59498 |
| C  | -3.01816 | -0.73953 | 0.75851  |
| H  | -2.75959 | -0.69835 | 1.83404  |
| H  | -3.95044 | -1.31681 | 0.63725  |
| N  | -1.95019 | 1.20131  | -0.02019 |

|    |          |          |          |
|----|----------|----------|----------|
| C  | 1.16711  | 2.3758   | 1.01911  |
| C  | 1.70962  | 1.56425  | -1.15797 |
| C  | 2.07845  | 3.55991  | 0.76022  |
| H  | 1.7043   | 1.54887  | 1.50332  |
| H  | 0.34948  | 2.62973  | 1.70966  |
| C  | 2.52093  | 2.81181  | -1.41086 |
| H  | 2.37143  | 0.8721   | -0.62523 |
| H  | 1.3635   | 1.02458  | -2.05414 |
| H  | 2.59746  | 3.82509  | 1.69163  |
| H  | 1.49846  | 4.46016  | 0.46341  |
| H  | 3.36209  | 2.58318  | -2.07895 |
| H  | 1.92259  | 3.60746  | -1.90516 |
| C  | -2.05626 | -1.66612 | -1.332   |
| C  | -1.47462 | -2.63086 | 0.81488  |
| C  | -2.96817 | -2.85835 | -1.55781 |
| H  | -1.06701 | -1.82819 | -1.7927  |
| H  | -2.47641 | -0.76478 | -1.80379 |
| C  | -2.43367 | -3.75961 | 0.51083  |
| H  | -0.4702  | -2.91581 | 0.47012  |
| H  | -1.39174 | -2.39815 | 1.88448  |
| H  | -2.99314 | -3.10492 | -2.62798 |
| H  | -4.01182 | -2.61911 | -1.25874 |
| H  | -2.07976 | -4.68684 | 0.98085  |
| H  | -3.44291 | -3.55376 | 0.92653  |
| N  | 0.57979  | 1.83007  | -0.23747 |
| N  | -1.84075 | -1.38406 | 0.10744  |
| O  | -2.51944 | -4.00068 | -0.87465 |
| O  | 3.06935  | 3.28633  | -0.20028 |
| Cl | -0.31321 | -0.15906 | 2.68148  |
| H  | -0.31556 | 2.70631  | -1.93459 |

## O<sub>2</sub>-TS<sub>L</sub>

|   |          |          |          |
|---|----------|----------|----------|
| C | -0.58513 | -2.24659 | -1.11896 |
| H | -0.22958 | -2.13216 | -2.15225 |
| C | -2.04943 | -2.08648 | -1.04151 |
| C | -2.66541 | -1.19641 | -1.94087 |
| C | -2.85043 | -2.79385 | -0.13488 |
| C | -4.0408  | -0.99136 | -1.90476 |
| H | -2.03336 | -0.61788 | -2.6248  |
| C | -4.2283  | -2.59105 | -0.10704 |
| H | -2.38586 | -3.49796 | 0.5569   |
| C | -4.828   | -1.68494 | -0.98337 |
| H | -4.50172 | -0.27818 | -2.59272 |
| H | -4.84149 | -3.14684 | 0.60724  |

|    |          |          |          |
|----|----------|----------|----------|
| H  | -5.90813 | -1.52225 | -0.95085 |
| H  | -0.32473 | -0.7658  | -0.78187 |
| Ni | 0.23862  | 0.72694  | -0.38725 |
| C  | 0.46072  | 2.88618  | 1.38514  |
| C  | 2.3402   | 2.50593  | 0.02156  |
| C  | 1.0632   | 3.9926   | 1.9691   |
| C  | 3.00969  | 3.58334  | 0.58687  |
| C  | 2.35415  | 4.34605  | 1.56011  |
| H  | 0.54445  | 4.55819  | 2.74583  |
| H  | 4.02428  | 3.83051  | 0.26765  |
| H  | 2.85468  | 5.20479  | 2.01112  |
| C  | -0.81928 | 2.22553  | 1.77907  |
| H  | -1.53562 | 2.94573  | 2.20808  |
| C  | 2.80059  | 1.57939  | -1.05431 |
| H  | 2.37407  | 1.92161  | -2.01669 |
| H  | 3.90016  | 1.54931  | -1.14028 |
| N  | 1.09169  | 2.19483  | 0.42171  |
| C  | -2.10536 | 2.34273  | -0.31184 |
| C  | -2.351   | 0.43729  | 1.13275  |
| C  | -3.39462 | 2.89113  | 0.26453  |
| H  | -2.30471 | 1.73995  | -1.20917 |
| H  | -1.42184 | 3.13952  | -0.64089 |
| C  | -3.61369 | 1.0592   | 1.68525  |
| H  | -2.61951 | -0.17169 | 0.26469  |
| H  | -1.8453  | -0.23294 | 1.84067  |
| H  | -3.93695 | 3.4432   | -0.51549 |
| H  | -3.19736 | 3.61777  | 1.0823   |
| H  | -4.32372 | 0.26596  | 1.95665  |
| H  | -3.41663 | 1.64522  | 2.60936  |
| C  | 2.72604  | -0.44849 | 0.37074  |
| C  | 2.37005  | -0.63845 | -2.00154 |
| C  | 4.13011  | -0.9803  | 0.16031  |
| H  | 2.04298  | -1.28728 | 0.57935  |
| H  | 2.68506  | 0.23763  | 1.23009  |
| C  | 3.78957  | -1.14373 | -2.13086 |
| H  | 1.70779  | -1.49869 | -1.84808 |
| H  | 2.00176  | -0.09544 | -2.88349 |
| H  | 4.44618  | -1.56751 | 1.03465  |
| H  | 4.85603  | -0.14602 | 0.05526  |
| H  | 3.86174  | -1.85885 | -2.96128 |
| H  | 4.49911  | -0.31988 | -2.35289 |
| N  | -1.3906  | 1.45587  | 0.64568  |
| N  | 2.19241  | 0.23983  | -0.82618 |
| O  | 4.19625  | -1.82695 | -0.96046 |

|    |          |          |          |
|----|----------|----------|----------|
| O  | -4.24777 | 1.86973  | 0.72064  |
| Cl | -0.08822 | 1.4501   | -2.76215 |
| H  | -0.59557 | 1.49479  | 2.57631  |
| C  | 0.25393  | -2.98107 | -0.29332 |
| H  | 1.20063  | -3.30434 | -0.73649 |
| C  | 0.19234  | -2.93385 | 1.16107  |
| O  | -0.55814 | -2.16815 | 1.77724  |
| N  | 1.12014  | -3.71256 | 1.84215  |
| C  | 1.33469  | -3.47961 | 3.24501  |
| H  | 0.54358  | -2.81835 | 3.61283  |
| H  | 1.30773  | -4.4211  | 3.81606  |
| H  | 2.31248  | -3.00032 | 3.44034  |
| C  | 2.03618  | -4.60022 | 1.17166  |
| H  | 2.43268  | -5.32703 | 1.89332  |
| H  | 1.53145  | -5.16911 | 0.38001  |
| H  | 2.89841  | -4.07746 | 0.71407  |

## 7<sub>L</sub>

|    |          |          |          |
|----|----------|----------|----------|
| C  | 0.57346  | 2.07694  | -1.17207 |
| H  | 0.27529  | 2.13128  | -2.23236 |
| C  | 2.07929  | 2.06519  | -1.11155 |
| C  | 2.78097  | 1.21924  | -1.98497 |
| C  | 2.79732  | 2.816    | -0.17789 |
| C  | 4.16685  | 1.1067   | -1.90264 |
| H  | 2.21682  | 0.61073  | -2.69997 |
| C  | 4.18559  | 2.7068   | -0.0995  |
| H  | 2.25289  | 3.4825   | 0.49612  |
| C  | 4.87529  | 1.84684  | -0.95428 |
| H  | 4.6988   | 0.43283  | -2.57918 |
| H  | 4.73459  | 3.29724  | 0.63931  |
| H  | 5.96233  | 1.75777  | -0.88654 |
| H  | 0.29741  | 0.98916  | -0.88637 |
| Ni | -0.27135 | -0.68378 | -0.34899 |
| C  | -0.49303 | -2.76208 | 1.50629  |
| C  | -2.3708  | -2.41779 | 0.12535  |
| C  | -1.04261 | -3.9268  | 2.02403  |
| C  | -2.98719 | -3.55775 | 0.62538  |
| C  | -2.3106  | -4.32229 | 1.58188  |
| H  | -0.49861 | -4.51069 | 2.76923  |
| H  | -3.97344 | -3.85511 | 0.26309  |
| H  | -2.77    | -5.22825 | 1.98123  |
| C  | 0.7861   | -2.08437 | 1.86844  |
| H  | 1.49168  | -2.76958 | 2.36504  |
| C  | -2.8339  | -1.51391 | -0.97216 |

|    |          |          |          |
|----|----------|----------|----------|
| H  | -2.42976 | -1.89146 | -1.93076 |
| H  | -3.93378 | -1.47625 | -1.05051 |
| N  | -1.16    | -2.04796 | 0.58369  |
| C  | 2.05196  | -2.41444 | -0.21667 |
| C  | 2.36624  | -0.40267 | 1.06003  |
| C  | 3.33318  | -2.94791 | 0.39458  |
| H  | 2.25924  | -1.89519 | -1.16265 |
| H  | 1.34551  | -3.22206 | -0.46155 |
| C  | 3.61377  | -1.01436 | 1.65485  |
| H  | 2.65088  | 0.11484  | 0.13806  |
| H  | 1.88157  | 0.33951  | 1.70843  |
| H  | 3.85018  | -3.58039 | -0.34005 |
| H  | 3.12169  | -3.59623 | 1.27268  |
| H  | 4.34684  | -0.22232 | 1.8579   |
| H  | 3.40812  | -1.51979 | 2.62302  |
| C  | -2.72467 | 0.54581  | 0.4034   |
| C  | -2.41117 | 0.69538  | -1.96538 |
| C  | -4.13611 | 1.06276  | 0.21212  |
| H  | -2.04524 | 1.39756  | 0.54824  |
| H  | -2.65128 | -0.1021  | 1.28841  |
| C  | -3.83716 | 1.19026  | -2.08334 |
| H  | -1.76249 | 1.57018  | -1.80969 |
| H  | -2.0522  | 0.158    | -2.85327 |
| H  | -4.43191 | 1.66536  | 1.08265  |
| H  | -4.86101 | 0.2231   | 0.14305  |
| H  | -3.91899 | 1.8917   | -2.92452 |
| H  | -4.54154 | 0.35731  | -2.28906 |
| N  | 1.37258  | -1.43091 | 0.66739  |
| N  | -2.21699 | -0.17706 | -0.78744 |
| O  | -4.23555 | 1.88608  | -0.92223 |
| O  | 4.21709  | -1.91671 | 0.75365  |
| Cl | 0.14129  | -1.27116 | -2.64534 |
| H  | 0.5624   | -1.275   | 2.58546  |
| C  | -0.20477 | 2.99573  | -0.34381 |
| H  | -0.86683 | 3.70795  | -0.83886 |
| C  | -0.28924 | 2.76099  | 1.05484  |
| O  | 0.24508  | 1.75379  | 1.59653  |
| N  | -1.06889 | 3.63075  | 1.82931  |
| C  | -1.38061 | 3.26485  | 3.18277  |
| H  | -0.6457  | 2.52808  | 3.52472  |
| H  | -1.34472 | 4.14359  | 3.84769  |
| H  | -2.38903 | 2.81245  | 3.28963  |
| C  | -1.89192 | 4.63663  | 1.21227  |
| H  | -2.32635 | 5.28051  | 1.98871  |



|   |          |         |         |
|---|----------|---------|---------|
| H | -1.30266 | 5.28289 | 0.54483 |
| H | -2.72646 | 4.21417 | 0.61623 |

### O-TS<sub>H</sub>

|    |          |          |          |
|----|----------|----------|----------|
| Ni | -0.28432 | -0.1973  | -0.63044 |
| C  | -0.3029  | -2.51442 | 1.05609  |
| C  | -2.44891 | -1.73954 | 0.5085   |
| C  | -0.84394 | -3.52748 | 1.85036  |
| C  | -3.05059 | -2.70926 | 1.30384  |
| C  | -2.22747 | -3.61357 | 1.97851  |
| H  | -0.18441 | -4.22453 | 2.37047  |
| H  | -4.13778 | -2.75953 | 1.38902  |
| H  | -2.66993 | -4.38816 | 2.60865  |
| C  | 1.15417  | -2.22445 | 0.9053   |
| H  | 1.75207  | -3.14518 | 1.0282   |
| C  | -3.17605 | -0.7467  | -0.35439 |
| H  | -3.2614  | -1.16738 | -1.37207 |
| H  | -4.21305 | -0.61363 | 0.00419  |
| N  | -1.11565 | -1.66354 | 0.41314  |
| C  | 1.43844  | -2.38555 | -1.53601 |
| C  | 2.68505  | -0.72934 | -0.30255 |
| C  | 2.70033  | -3.22068 | -1.61612 |
| H  | 1.36804  | -1.72968 | -2.4179  |
| H  | 0.53783  | -3.02138 | -1.52033 |
| C  | 3.90153  | -1.61906 | -0.43312 |
| H  | 2.64565  | -0.00869 | -1.13509 |
| H  | 2.70598  | -0.16979 | 0.64446  |
| H  | 2.71719  | -3.79594 | -2.55264 |
| H  | 2.74035  | -3.95878 | -0.78573 |
| H  | 4.81401  | -1.01143 | -0.497   |
| H  | 4.00632  | -2.27057 | 0.46055  |
| C  | -2.5142  | 1.32343  | 0.76244  |
| C  | -2.83979 | 1.33317  | -1.61554 |
| C  | -3.87099 | 1.98115  | 0.91657  |
| H  | -1.73947 | 2.10339  | 0.69743  |
| H  | -2.2658  | 0.69547  | 1.63224  |
| C  | -4.19045 | 1.97728  | -1.39054 |
| H  | -2.06814 | 2.10454  | -1.75658 |
| H  | -2.81741 | 0.71561  | -2.52448 |
| H  | -3.86809 | 2.65662  | 1.78268  |
| H  | -4.66232 | 1.22411  | 1.10519  |
| H  | -4.43821 | 2.65147  | -2.22151 |
| H  | -4.99416 | 1.21093  | -1.34674 |
| N  | 1.42791  | -1.50615 | -0.34847 |

|    |          |          |          |
|----|----------|----------|----------|
| N  | -2.4207  | 0.50883  | -0.46713 |
| O  | -4.19519 | 2.75337  | -0.21352 |
| O  | 3.84721  | -2.41001 | -1.60199 |
| Cl | 0.27441  | 0.7382   | -2.58434 |
| C  | 0.75778  | 1.03074  | 1.88047  |
| H  | -0.17051 | 1.51082  | 2.30963  |
| H  | 0.28467  | 0.62954  | 0.9842   |
| O  | 1.30374  | 0.11436  | 2.608    |
| C  | 1.65149  | 2.12599  | 1.32242  |
| C  | 2.86039  | 2.39553  | 1.9696   |
| C  | 1.30174  | 2.87723  | 0.19656  |
| C  | 3.69731  | 3.41072  | 1.50984  |
| H  | 3.1226   | 1.78191  | 2.83612  |
| C  | 2.139    | 3.88738  | -0.27065 |
| H  | 0.38522  | 2.63407  | -0.35424 |
| C  | 3.33835  | 4.16078  | 0.38936  |
| H  | 4.63903  | 3.61785  | 2.0259   |
| H  | 1.86317  | 4.45184  | -1.16505 |
| H  | 3.99808  | 4.95096  | 0.02182  |
| H  | 1.41636  | -1.52555 | 1.73765  |

### O<sub>2</sub>-TS<sub>H</sub>

|    |          |          |          |
|----|----------|----------|----------|
| Ni | -0.01886 | -0.96038 | -0.74142 |
| C  | -0.01669 | -1.40338 | 2.08287  |
| C  | -2.11825 | -1.72323 | 1.10302  |
| C  | -0.53943 | -1.61546 | 3.35586  |
| C  | -2.71302 | -1.90376 | 2.34872  |
| C  | -1.90854 | -1.85084 | 3.48715  |
| H  | 0.11485  | -1.58324 | 4.22961  |
| H  | -3.7857  | -2.09421 | 2.42301  |
| H  | -2.34787 | -1.99781 | 4.47603  |
| C  | 1.41361  | -1.05092 | 1.78577  |
| H  | 2.07656  | -1.45092 | 2.57621  |
| C  | -2.81829 | -1.86215 | -0.22077 |
| H  | -2.6647  | -2.89256 | -0.58865 |
| H  | -3.91029 | -1.74716 | -0.08838 |
| N  | -0.80723 | -1.45902 | 1.00063  |
| C  | 1.95059  | -2.92345 | 0.28744  |
| C  | 2.98997  | -0.79332 | -0.07708 |
| C  | 3.2505   | -3.40899 | 0.89949  |
| H  | 1.93825  | -3.13267 | -0.79465 |
| H  | 1.08404  | -3.43707 | 0.73487  |
| C  | 4.25237  | -1.33627 | 0.55405  |
| H  | 3.00566  | -0.96061 | -1.16578 |

|    |          |          |          |
|----|----------|----------|----------|
| H  | 2.8873   | 0.2864   | 0.09894  |
| H  | 3.39269  | -4.4798  | 0.69675  |
| H  | 3.22825  | -3.29272 | 2.00519  |
| H  | 5.13858  | -0.87688 | 0.09581  |
| H  | 4.28999  | -1.09662 | 1.63807  |
| C  | -2.62915 | 0.44611  | -0.95269 |
| C  | -2.56954 | -1.29765 | -2.60343 |
| C  | -4.05622 | 0.74083  | -1.36363 |
| H  | -1.9366  | 1.08776  | -1.52068 |
| H  | -2.47221 | 0.66243  | 0.11382  |
| C  | -4.00509 | -0.96412 | -2.95015 |
| H  | -1.88072 | -0.72889 | -3.24562 |
| H  | -2.33978 | -2.35979 | -2.7734  |
| H  | -4.26396 | 1.81458  | -1.25921 |
| H  | -4.7767  | 0.21088  | -0.70357 |
| H  | -4.19557 | -1.14905 | -4.01633 |
| H  | -4.71152 | -1.60645 | -2.38067 |
| N  | 1.78122  | -1.46494 | 0.4312   |
| N  | -2.23923 | -0.9516  | -1.21184 |
| O  | -4.28586 | 0.39703  | -2.70981 |
| O  | 4.35753  | -2.73138 | 0.36144  |
| Cl | 0.82198  | -1.36461 | -2.78142 |
| H  | 0.16863  | 0.73305  | -0.28027 |
| H  | 1.52329  | 0.0498   | 1.82352  |
| C  | 2.9634   | 2.80525  | 0.17856  |
| O  | 3.81808  | 3.29131  | 0.92198  |
| C  | 1.66183  | 2.4468   | 0.73855  |
| H  | 1.68444  | 2.47896  | 1.83319  |
| C  | 0.42116  | 2.26015  | 0.11362  |
| H  | 0.33838  | 2.58329  | -0.93075 |
| C  | -0.81998 | 2.50082  | 0.88618  |
| C  | -1.83109 | 3.31367  | 0.35373  |
| C  | -1.0407  | 1.91164  | 2.14009  |
| C  | -3.02687 | 3.51719  | 1.03883  |
| H  | -1.67463 | 3.78547  | -0.6214  |
| C  | -2.23954 | 2.10236  | 2.82219  |
| H  | -0.25982 | 1.2848   | 2.5803   |
| C  | -3.2432  | 2.90187  | 2.27209  |
| H  | -3.7985  | 4.15843  | 0.60438  |
| H  | -2.39206 | 1.62207  | 3.79276  |
| H  | -4.18379 | 3.0532   | 2.80691  |
| N  | 3.23247  | 2.62808  | -1.17512 |
| C  | 2.4484   | 1.87251  | -2.12002 |
| H  | 1.86161  | 2.51353  | -2.80457 |

|   |         |         |          |
|---|---------|---------|----------|
| H | 3.11362 | 1.26207 | -2.7519  |
| H | 1.7626  | 1.16867 | -1.63843 |
| C | 4.44653 | 3.19258 | -1.70679 |
| H | 5.13958 | 2.40661 | -2.05516 |
| H | 4.23253 | 3.8478  | -2.56804 |
| H | 4.94287 | 3.7727  | -0.92306 |

## 7<sub>H</sub>

|    |          |          |          |
|----|----------|----------|----------|
| Ni | -0.04122 | -1.05982 | -0.75404 |
| C  | 0.02994  | -1.42309 | 2.0699   |
| C  | -2.09578 | -1.6978  | 1.12657  |
| C  | -0.47271 | -1.64597 | 3.34785  |
| C  | -2.66676 | -1.88468 | 2.37999  |
| C  | -1.84286 | -1.85935 | 3.50699  |
| H  | 0.20089  | -1.63584 | 4.20763  |
| H  | -3.74063 | -2.06237 | 2.46995  |
| H  | -2.2653  | -2.01282 | 4.50193  |
| C  | 1.46288  | -1.09012 | 1.76519  |
| H  | 2.125    | -1.53336 | 2.53318  |
| C  | -2.83091 | -1.83325 | -0.17822 |
| H  | -2.73494 | -2.87853 | -0.52281 |
| H  | -3.91366 | -1.66526 | -0.02581 |
| N  | -0.77876 | -1.44704 | 0.99256  |
| C  | 1.927    | -2.92098 | 0.1937   |
| C  | 3.03761  | -0.81923 | -0.09803 |
| C  | 3.21041  | -3.47576 | 0.78056  |
| H  | 1.90471  | -3.08877 | -0.89582 |
| H  | 1.04468  | -3.42119 | 0.62454  |
| C  | 4.28362  | -1.42917 | 0.50609  |
| H  | 3.04225  | -0.94907 | -1.19195 |
| H  | 2.98007  | 0.2581   | 0.11648  |
| H  | 3.31295  | -4.54215 | 0.53504  |
| H  | 3.19623  | -3.40244 | 1.8899   |
| H  | 5.18372  | -0.98578 | 0.05934  |
| H  | 4.33405  | -1.22902 | 1.59754  |
| C  | -2.55247 | 0.44184  | -0.9949  |
| C  | -2.59173 | -1.35852 | -2.58193 |
| C  | -3.96816 | 0.78924  | -1.40379 |
| H  | -1.83512 | 1.02839  | -1.59367 |
| H  | -2.38164 | 0.6867   | 0.06304  |
| C  | -4.01411 | -0.97299 | -2.92746 |
| H  | -1.88186 | -0.84588 | -3.24833 |
| H  | -2.41606 | -2.4364  | -2.71349 |
| H  | -4.12622 | 1.87426  | -1.33666 |

|    |          |          |          |
|----|----------|----------|----------|
| H  | -4.70173 | 0.31653  | -0.71562 |
| H  | -4.22498 | -1.18557 | -3.98458 |
| H  | -4.74258 | -1.56114 | -2.3281  |
| N  | 1.80692  | -1.4627  | 0.39266  |
| N  | -2.23208 | -0.98099 | -1.20696 |
| O  | -4.23055 | 0.40754  | -2.73337 |
| O  | 4.34013  | -2.81838 | 0.26413  |
| Cl | 0.79427  | -1.12473 | -2.82144 |
| H  | 0.22677  | 0.96328  | -0.1308  |
| H  | 1.60559  | 0.00597  | 1.84348  |
| C  | 2.89132  | 2.85015  | 0.23273  |
| O  | 3.70072  | 3.40679  | 0.98091  |
| C  | 1.63816  | 2.36095  | 0.78398  |
| H  | 1.63707  | 2.41809  | 1.87797  |
| C  | 0.35046  | 2.08538  | 0.12226  |
| H  | 0.28829  | 2.56163  | -0.86872 |
| C  | -0.85007 | 2.47526  | 0.93943  |
| C  | -1.77792 | 3.40594  | 0.45789  |
| C  | -1.10256 | 1.86923  | 2.17743  |
| C  | -2.93624 | 3.70213  | 1.1755   |
| H  | -1.59313 | 3.89435  | -0.50411 |
| C  | -2.26242 | 2.15496  | 2.89446  |
| H  | -0.37922 | 1.15365  | 2.58271  |
| C  | -3.19011 | 3.0683   | 2.39132  |
| H  | -3.64779 | 4.43117  | 0.77968  |
| H  | -2.44315 | 1.66005  | 3.85278  |
| H  | -4.1006  | 3.29418  | 2.95131  |
| N  | 3.1672   | 2.71288  | -1.12507 |
| C  | 2.45204  | 1.88188  | -2.05953 |
| H  | 1.83279  | 2.45992  | -2.77088 |
| H  | 3.163    | 1.29485  | -2.66415 |
| H  | 1.80474  | 1.15035  | -1.56878 |
| C  | 4.32913  | 3.37482  | -1.65856 |
| H  | 5.07168  | 2.64818  | -2.03211 |
| H  | 4.0588   | 4.03136  | -2.50277 |
| H  | 4.79276  | 3.97332  | -0.86822 |

## **B<sub>L</sub>**

|    |          |          |          |
|----|----------|----------|----------|
| Ni | -0.10775 | -0.08591 | 0.4891   |
| Cl | -1.05594 | -1.73475 | 1.60661  |
| O  | -4.04591 | -0.48663 | -0.7941  |
| O  | 1.71722  | -3.36774 | -1.31044 |
| N  | 0.85971  | 1.46871  | 0.22528  |
| N  | -1.70812 | 1.08655  | -0.07423 |

|   |          |          |          |
|---|----------|----------|----------|
| N | 1.76947  | -0.92909 | 0.23248  |
| C | -1.99008 | 0.55022  | -1.45353 |
| H | -1.02666 | 0.42525  | -1.96219 |
| H | -2.56429 | 1.31454  | -1.99557 |
| C | -2.79755 | -0.72678 | -1.41528 |
| H | -3.0074  | -1.06239 | -2.43553 |
| H | -2.24798 | -1.525   | -0.88808 |
| C | -3.83185 | -0.13276 | 0.56496  |
| H | -3.37173 | -0.96649 | 1.10609  |
| H | -4.81872 | 0.06284  | 0.99368  |
| C | -2.98618 | 1.12062  | 0.69577  |
| H | -3.55907 | 1.9815   | 0.31872  |
| H | -2.73376 | 1.31505  | 1.74154  |
| C | -1.19653 | 2.44408  | -0.18366 |
| H | -1.91708 | 3.22534  | -0.39839 |
| C | 0.15931  | 2.60841  | -0.13239 |
| C | 0.93603  | 3.78861  | -0.38451 |
| H | 0.42727  | 4.69081  | -0.7096  |
| C | 2.29621  | 3.75528  | -0.24449 |
| H | 2.8739   | 4.65465  | -0.44191 |
| C | 2.97338  | 2.56537  | 0.13631  |
| H | 4.04569  | 2.54207  | 0.29321  |
| C | 2.20013  | 1.44856  | 0.3517   |
| C | 2.66353  | 0.1068   | 0.82098  |
| H | 3.71345  | -0.09855 | 0.5632   |
| H | 2.56198  | 0.02864  | 1.91125  |
| C | 2.0243   | -0.99333 | -1.23606 |
| H | 3.10425  | -1.14387 | -1.3952  |
| H | 1.74145  | -0.03422 | -1.67948 |
| C | 1.27444  | -2.14692 | -1.85772 |
| H | 0.18606  | -2.01826 | -1.69666 |
| H | 1.46275  | -2.18488 | -2.93401 |
| C | 1.40953  | -3.39074 | 0.07576  |
| H | 1.77594  | -4.34427 | 0.46376  |
| H | 0.32313  | -3.34443 | 0.22248  |
| C | 2.07741  | -2.25441 | 0.82775  |
| H | 1.73743  | -2.24105 | 1.86754  |
| H | 3.17104  | -2.38737 | 0.80616  |

### **B<sub>L</sub>-TS1**

|    |          |         |          |
|----|----------|---------|----------|
| Ni | -0.44784 | 0.21613 | -0.71429 |
| C  | -2.01143 | 1.46519 | 1.17549  |
| C  | -0.26305 | 2.79709 | 0.28309  |
| C  | -2.39991 | 2.52803 | 2.0091   |

|    |          |          |          |
|----|----------|----------|----------|
| C  | -0.58661 | 3.86763  | 1.10464  |
| C  | -1.68366 | 3.71675  | 1.96766  |
| H  | -3.24422 | 2.40359  | 2.68891  |
| H  | -0.00391 | 4.78928  | 1.07695  |
| H  | -1.97337 | 4.54381  | 2.61982  |
| C  | -2.44202 | 0.08551  | 1.16902  |
| H  | -3.43606 | -0.10974 | 1.59496  |
| C  | 0.81683  | 2.72105  | -0.74456 |
| H  | 0.41987  | 3.04478  | -1.72198 |
| H  | 1.65637  | 3.39502  | -0.50994 |
| N  | -0.96895 | 1.6608   | 0.33095  |
| C  | -3.19386 | -0.03012 | -1.2175  |
| C  | -2.3244  | -1.98615 | -0.1237  |
| C  | -4.59112 | -0.56241 | -0.97475 |
| H  | -2.81521 | -0.38475 | -2.18951 |
| H  | -3.18512 | 1.07003  | -1.22835 |
| C  | -3.75027 | -2.44817 | 0.09407  |
| H  | -1.95133 | -2.37948 | -1.07876 |
| H  | -1.65354 | -2.32851 | 0.67412  |
| H  | -5.25561 | -0.26142 | -1.79645 |
| H  | -5.0118  | -0.13099 | -0.04202 |
| H  | -3.79326 | -3.54495 | 0.05718  |
| H  | -4.12747 | -2.14443 | 1.0919   |
| C  | 2.03787  | 0.82461  | 0.27415  |
| C  | 2.08273  | 1.12011  | -2.10759 |
| C  | 3.40102  | 1.47467  | 0.34937  |
| H  | 2.1607   | -0.25651 | 0.125    |
| H  | 1.44219  | 0.93668  | 1.19245  |
| C  | 3.44058  | 1.776    | -1.95762 |
| H  | 2.19952  | 0.03781  | -2.24603 |
| H  | 1.53408  | 1.49673  | -2.98262 |
| H  | 3.9747   | 1.01329  | 1.16405  |
| H  | 3.32742  | 2.55874  | 0.58078  |
| H  | 4.05324  | 1.55686  | -2.84291 |
| H  | 3.35065  | 2.88223  | -1.9004  |
| N  | -2.23652 | -0.50712 | -0.18666 |
| N  | 1.24724  | 1.30531  | -0.89813 |
| O  | 4.13352  | 1.28062  | -0.83944 |
| O  | -4.6056  | -1.96662 | -0.91916 |
| Cl | -0.05214 | -1.2391  | -2.32707 |
| H  | -1.47764 | -0.41562 | 1.74876  |
| C  | 0.24383  | -1.8513  | 2.42605  |
| H  | -0.46875 | -2.70812 | 2.30771  |
| H  | 0.42357  | -1.78305 | 3.52491  |

|   |          |          |          |
|---|----------|----------|----------|
| O | -0.23258 | -0.67833 | 1.88732  |
| C | 1.53791  | -2.21442 | 1.74049  |
| C | 1.50893  | -2.72286 | 0.43595  |
| C | 2.77902  | -1.88301 | 2.29539  |
| C | 2.67909  | -2.86877 | -0.30553 |
| H | 0.54803  | -2.96775 | -0.02597 |
| C | 3.95718  | -2.03745 | 1.56255  |
| H | 2.81578  | -1.48083 | 3.31357  |
| C | 3.9098   | -2.51992 | 0.2544   |
| H | 2.62344  | -3.23954 | -1.33235 |
| H | 4.91863  | -1.76912 | 2.01018  |
| H | 4.82916  | -2.6215  | -0.32759 |

### **B<sub>L2</sub>-TS2**

|    |          |          |          |
|----|----------|----------|----------|
| Ni | -0.00885 | -1.11884 | -0.64932 |
| C  | 0.06646  | -1.24092 | 2.19478  |
| C  | -2.06775 | -1.55144 | 1.28481  |
| C  | -0.43001 | -1.36789 | 3.48778  |
| C  | -2.63325 | -1.63786 | 2.55229  |
| C  | -1.80219 | -1.54869 | 3.6697   |
| H  | 0.24993  | -1.30797 | 4.3405   |
| H  | -3.70948 | -1.78981 | 2.66022  |
| H  | -2.21987 | -1.62713 | 4.67541  |
| C  | 1.49927  | -0.93476 | 1.8627   |
| H  | 2.16268  | -1.31762 | 2.66156  |
| C  | -2.82415 | -1.79367 | 0.00718  |
| H  | -2.81887 | -2.88083 | -0.18801 |
| H  | -3.8887  | -1.52191 | 0.13799  |
| N  | -0.74886 | -1.33298 | 1.12527  |
| C  | 1.96656  | -2.87941 | 0.43826  |
| C  | 3.06987  | -0.80041 | -0.02031 |
| C  | 3.25409  | -3.38246 | 1.06048  |
| H  | 1.94105  | -3.13512 | -0.63391 |
| H  | 1.08716  | -3.34448 | 0.9124   |
| C  | 4.32082  | -1.3628  | 0.61944  |
| H  | 3.06928  | -1.00779 | -1.10236 |
| H  | 3.01021  | 0.29027  | 0.11555  |
| H  | 3.35773  | -4.4651  | 0.90221  |
| H  | 3.24708  | -3.2184  | 2.16017  |
| H  | 5.21716  | -0.95446 | 0.13361  |
| H  | 4.37957  | -1.08147 | 1.69255  |
| C  | -2.5107  | 0.29526  | -1.20902 |
| C  | -2.48944 | -1.77411 | -2.42848 |
| C  | -3.90699 | 0.54851  | -1.73945 |



|    |          |          |          |
|----|----------|----------|----------|
| H  | -1.76441 | 0.76026  | -1.87574 |
| H  | -2.38595 | 0.73766  | -0.20982 |
| C  | -3.89932 | -1.47377 | -2.8898  |
| H  | -1.76112 | -1.38401 | -3.15485 |
| H  | -2.30312 | -2.8554  | -2.34891 |
| H  | -4.06562 | 1.62596  | -1.88607 |
| H  | -4.67113 | 0.21095  | -1.00624 |
| H  | -4.07745 | -1.89313 | -3.88942 |
| H  | -4.64888 | -1.93086 | -2.20726 |
| N  | 1.84308  | -1.40989 | 0.52194  |
| N  | -2.18331 | -1.14083 | -1.13547 |
| O  | -4.11296 | -0.08266 | -2.98048 |
| O  | 4.37739  | -2.76651 | 0.4832   |
| Cl | 0.85195  | -1.34918 | -2.69949 |
| H  | 0.17672  | 0.94241  | -0.20634 |
| H  | 1.63966  | 0.16435  | 1.8573   |
| C  | 2.77999  | 2.94433  | -0.01271 |
| O  | 3.56996  | 3.60133  | 0.67173  |
| C  | 1.56251  | 2.43269  | 0.59633  |
| H  | 1.57328  | 2.56108  | 1.68423  |
| C  | 0.27596  | 2.08275  | -0.03123 |
| H  | 0.19764  | 2.48883  | -1.05239 |
| C  | -0.92713 | 2.50159  | 0.76783  |
| C  | -1.87962 | 3.37923  | 0.2352   |
| C  | -1.15244 | 1.98177  | 2.04918  |
| C  | -3.03393 | 3.7043   | 0.94687  |
| H  | -1.7169  | 3.80209  | -0.76127 |
| C  | -2.30698 | 2.29747  | 2.76178  |
| H  | -0.40755 | 1.31744  | 2.49669  |
| C  | -3.25828 | 3.15549  | 2.20934  |
| H  | -3.76403 | 4.39149  | 0.51164  |
| H  | -2.4634  | 1.87082  | 3.75639  |
| H  | -4.16464 | 3.40522  | 2.76589  |
| N  | 3.03122  | 2.72184  | -1.36353 |
| C  | 2.37208  | 1.74834  | -2.19463 |
| H  | 1.71225  | 2.20161  | -2.95759 |
| H  | 3.1174   | 1.14604  | -2.74012 |
| H  | 1.77614  | 1.03555  | -1.61858 |
| C  | 4.13837  | 3.40604  | -1.97818 |
| H  | 4.93892  | 2.70363  | -2.27027 |
| H  | 3.8168   | 3.93517  | -2.89079 |
| H  | 4.55229  | 4.12643  | -1.266   |

**B<sub>2</sub>**

|    |          |          |          |
|----|----------|----------|----------|
| Ni | -0.13362 | -0.17582 | 0.49883  |
| Cl | -0.5976  | -1.46464 | 2.24382  |
| O  | -3.7784  | -1.23546 | -0.87151 |
| O  | 1.96399  | -3.21345 | -1.29645 |
| N  | 0.61201  | 1.53502  | 0.09531  |
| N  | -1.94916 | 0.86471  | -0.17685 |
| N  | 1.99037  | -0.71481 | 0.07682  |
| C  | -2.10381 | 0.34564  | -1.56543 |
| H  | -1.13993 | 0.46492  | -2.07764 |
| H  | -2.85424 | 0.94593  | -2.10265 |
| C  | -2.54022 | -1.1038  | -1.52839 |
| H  | -2.66332 | -1.50062 | -2.54043 |
| H  | -1.76613 | -1.7108  | -1.01174 |
| C  | -3.64643 | -0.80339 | 0.4782   |
| H  | -2.92209 | -1.4395  | 1.00805  |
| H  | -4.62794 | -0.92857 | 0.94205  |
| C  | -3.20973 | 0.6444   | 0.56399  |
| H  | -3.99161 | 1.30066  | 0.14545  |
| H  | -3.03987 | 0.9319   | 1.60584  |
| C  | -1.58963 | 2.26024  | -0.21035 |
| H  | -2.37874 | 2.98535  | -0.39491 |
| C  | -0.25793 | 2.59094  | -0.13351 |
| C  | 0.30692  | 3.9029   | -0.2682  |
| H  | -0.357   | 4.74646  | -0.43301 |
| C  | 1.66107  | 4.06983  | -0.19352 |
| H  | 2.08864  | 5.06189  | -0.31094 |
| C  | 2.52192  | 2.96314  | 0.04465  |
| H  | 3.59733  | 3.08676  | 0.11641  |
| C  | 1.94225  | 1.72797  | 0.21237  |
| C  | 2.6769   | 0.4756   | 0.60896  |
| H  | 3.73278  | 0.50762  | 0.2936   |
| H  | 2.66533  | 0.3831   | 1.70379  |
| C  | 2.1953   | -0.81387 | -1.38088 |
| H  | 3.27438  | -0.88322 | -1.60151 |
| H  | 1.80867  | 0.09996  | -1.84711 |
| C  | 1.4876   | -2.04017 | -1.91318 |
| H  | 0.3966   | -1.9327  | -1.74093 |
| H  | 1.65334  | -2.14964 | -2.98826 |
| C  | 1.74286  | -3.14123 | 0.10462  |
| H  | 2.11275  | -4.07649 | 0.53037  |
| H  | 0.66282  | -3.06461 | 0.31612  |
| C  | 2.45255  | -1.95482 | 0.72366  |
| H  | 2.20932  | -1.89107 | 1.78938  |
| H  | 3.54454  | -2.05918 | 0.60462  |

**B-TS1**

|    |          |          |          |
|----|----------|----------|----------|
| Ni | 0.53269  | 0.09074  | -0.50502 |
| C  | 1.15386  | 2.52596  | 0.76994  |
| C  | 3.02674  | 1.53256  | -0.29328 |
| C  | 2.00556  | 3.48772  | 1.36416  |
| C  | 3.91012  | 2.44405  | 0.26925  |
| C  | 3.36324  | 3.44207  | 1.09706  |
| H  | 1.58857  | 4.24645  | 2.02941  |
| H  | 4.98417  | 2.37465  | 0.08961  |
| H  | 4.02462  | 4.18463  | 1.55112  |
| C  | -0.23677 | 2.27739  | 1.04629  |
| H  | -0.77684 | 3.09576  | 1.54581  |
| C  | 3.36906  | 0.32245  | -1.1145  |
| H  | 3.0197   | 0.4707   | -2.15094 |
| H  | 4.46096  | 0.16191  | -1.14691 |
| N  | 1.71455  | 1.6247   | -0.07207 |
| C  | -1.03453 | 2.52295  | -1.30024 |
| C  | -2.28226 | 1.17635  | 0.22151  |
| C  | -2.03697 | 3.63411  | -1.09284 |
| H  | -1.34281 | 1.88326  | -2.14099 |
| H  | -0.03562 | 2.91139  | -1.5464  |
| C  | -3.27455 | 2.31399  | 0.36774  |
| H  | -2.60086 | 0.51917  | -0.60283 |
| H  | -2.25843 | 0.56765  | 1.13678  |
| H  | -2.14454 | 4.23283  | -2.00805 |
| H  | -1.6976  | 4.32281  | -0.29015 |
| H  | -4.28707 | 1.91273  | 0.51748  |
| H  | -3.03167 | 2.93072  | 1.25978  |
| C  | 3.04578  | -1.24099 | 0.76207  |
| C  | 2.70819  | -2.0139  | -1.48306 |
| C  | 4.39727  | -1.92471 | 0.75816  |
| H  | 2.28526  | -1.93736 | 1.15081  |
| H  | 3.03652  | -0.36073 | 1.4214   |
| C  | 4.06697  | -2.67942 | -1.42118 |
| H  | 1.94227  | -2.73449 | -1.15061 |
| H  | 2.43275  | -1.70607 | -2.50124 |
| H  | 4.64523  | -2.28865 | 1.765    |
| H  | 5.199    | -1.21221 | 0.46887  |
| H  | 4.06963  | -3.60168 | -2.01813 |
| H  | 4.85064  | -2.01865 | -1.84804 |
| N  | -0.92817 | 1.6551   | -0.1016  |
| N  | 2.61723  | -0.84257 | -0.59342 |
| O  | 4.40321  | -3.04197 | -0.09954 |

|    |          |          |          |
|----|----------|----------|----------|
| O  | -3.31415 | 3.11813  | -0.78584 |
| Cl | 0.21687  | -0.23828 | -2.73099 |
| H  | 0.01053  | 0.92632  | 1.6974   |
| H  | -2.14882 | -3.5012  | 1.34556  |
| C  | -0.54037 | -1.13703 | 1.77141  |
| O  | 0.35301  | -0.12731 | 1.65363  |
| C  | -0.59734 | -2.07439 | 0.77502  |
| H  | 0.21331  | -2.02619 | 0.03512  |
| C  | -1.71454 | -3.02857 | 0.45281  |
| H  | -1.31194 | -3.85706 | -0.15047 |
| C  | -2.8124  | -2.33803 | -0.32121 |
| C  | -2.62224 | -2.01127 | -1.66949 |
| C  | -3.99842 | -1.93302 | 0.30224  |
| C  | -3.58263 | -1.28749 | -2.37139 |
| H  | -1.68833 | -2.28798 | -2.16626 |
| C  | -4.96756 | -1.21535 | -0.40004 |
| H  | -4.16451 | -2.18309 | 1.3559   |
| C  | -4.7605  | -0.88515 | -1.73906 |
| H  | -3.39757 | -1.02429 | -3.41584 |
| H  | -5.8891  | -0.90977 | 0.10317  |
| H  | -5.51279 | -0.31323 | -2.28757 |
| N  | -1.29187 | -1.14983 | 2.92802  |
| C  | -1.70242 | -2.39133 | 3.53233  |
| H  | -1.07245 | -3.2158  | 3.17484  |
| H  | -1.5779  | -2.32567 | 4.6244   |
| H  | -2.75855 | -2.65356 | 3.34049  |
| C  | -1.45735 | 0.02592  | 3.74679  |
| H  | -0.78914 | 0.02272  | 4.62744  |
| H  | -1.25971 | 0.94283  | 3.17956  |
| H  | -2.49324 | 0.08935  | 4.11631  |

#### **B<sub>4</sub>**

|    |          |         |         |
|----|----------|---------|---------|
| Ni | -0.93794 | 1.65262 | 0.15098 |
| C  | -1.64054 | 3.50517 | 2.18312 |
| C  | 0.70809  | 3.08512 | 1.96004 |
| C  | -1.3607  | 4.30586 | 3.34243 |
| C  | 1.00584  | 3.83263 | 3.077   |
| C  | -0.07025 | 4.4621  | 3.76875 |
| H  | -2.19199 | 4.78111 | 3.86757 |
| H  | 2.03853  | 3.93856 | 3.41559 |
| H  | 0.14051  | 5.07226 | 4.65032 |
| C  | -2.89072 | 3.25561 | 1.6535  |
| H  | -3.80576 | 3.63419 | 2.11459 |

|    |          |          |          |  |
|----|----------|----------|----------|--|
| C  | 1.73715  | 2.41703  | 1.08897  |  |
| H  | 2.03934  | 3.11942  | 0.29478  |  |
| H  | 2.65458  | 2.20923  | 1.66984  |  |
| N  | -0.56016 | 2.93757  | 1.51006  |  |
| C  | -2.74607 | 3.50771  | -0.74431 |  |
| C  | -4.12604 | 1.73697  | 0.17164  |  |
| C  | -4.01016 | 4.2817   | -1.04337 |  |
| H  | -2.42081 | 2.9011   | -1.60768 |  |
| H  | -1.94237 | 4.17833  | -0.41532 |  |
| C  | -5.33868 | 2.58073  | -0.16466 |  |
| H  | -3.8935  | 1.05678  | -0.66322 |  |
| H  | -4.29811 | 1.11805  | 1.06295  |  |
| H  | -3.89038 | 4.90723  | -1.93572 |  |
| H  | -4.23704 | 4.95832  | -0.19017 |  |
| H  | -6.19506 | 1.94225  | -0.42228 |  |
| H  | -5.64243 | 3.19664  | 0.70865  |  |
| C  | 1.15374  | 0.03961  | 1.30178  |  |
| C  | 1.87891  | 0.87223  | -0.82511 |  |
| C  | 2.53198  | -0.56477 | 1.49221  |  |
| H  | 0.48321  | -0.69181 | 0.82103  |  |
| H  | 0.70442  | 0.32194  | 2.26741  |  |
| C  | 3.24398  | 0.27829  | -0.55946 |  |
| H  | 1.24095  | 0.14355  | -1.34969 |  |
| H  | 1.94637  | 1.76943  | -1.45829 |  |
| H  | 2.46044  | -1.50565 | 2.05566  |  |
| H  | 3.18058  | 0.11441  | 2.08567  |  |
| H  | 3.71936  | -0.04083 | -1.49775 |  |
| H  | 3.91601  | 1.03187  | -0.09386 |  |
| N  | -2.93728 | 2.57142  | 0.39985  |  |
| N  | 1.18367  | 1.22687  | 0.42332  |  |
| O  | 3.14308  | -0.8644  | 0.25995  |  |
| O  | -5.09275 | 3.41047  | -1.27939 |  |
| Cl | -1.43397 | 0.04582  | -1.27877 |  |
| C  | -2.45961 | -1.02467 | 2.5764   |  |
| H  | -1.70181 | -0.5512  | 3.22321  |  |
| H  | -2.11508 | -0.83825 | 1.53428  |  |
| O  | -3.65632 | -0.3743  | 2.84386  |  |
| C  | -2.4962  | -2.50564 | 2.82968  |  |
| C  | -3.54856 | -3.08574 | 3.54562  |  |
| C  | -1.47678 | -3.33224 | 2.34087  |  |
| C  | -3.59371 | -4.46526 | 3.74705  |  |
| H  | -4.34034 | -2.44468 | 3.94111  |  |
| C  | -1.51515 | -4.70887 | 2.55099  |  |
| H  | -0.64982 | -2.8887  | 1.77591  |  |

|   |          |          |         |
|---|----------|----------|---------|
| C | -2.58075 | -5.28232 | 3.24822 |
| H | -4.42826 | -4.90455 | 4.29989 |
| H | -0.7142  | -5.34136 | 2.15927 |
| H | -2.61557 | -6.36257 | 3.40631 |
| H | -3.14485 | 2.25561  | 2.00495 |

### **B<sub>2</sub>-TS1**

|    |          |          |          |
|----|----------|----------|----------|
| Ni | 0.39208  | 0.20633  | -0.57046 |
| C  | 3.16429  | 0.08755  | 0.4441   |
| C  | 2.51804  | -1.80014 | -0.768   |
| C  | 4.45316  | -0.41736 | 0.61891  |
| C  | 3.77771  | -2.37914 | -0.61012 |
| C  | 4.754    | -1.67085 | 0.08793  |
| H  | 5.20324  | 0.1605   | 1.16347  |
| H  | 3.9895   | -3.36229 | -1.03616 |
| H  | 5.75272  | -2.09485 | 0.21575  |
| C  | 2.6754   | 1.38712  | 1.02001  |
| H  | 3.53708  | 2.04642  | 1.23686  |
| C  | 1.40146  | -2.40055 | -1.57119 |
| H  | 1.46753  | -1.96277 | -2.58283 |
| H  | 1.54203  | -3.49363 | -1.66241 |
| N  | 2.24736  | -0.605   | -0.2353  |
| C  | 2.26447  | 2.68911  | -1.00386 |
| C  | 0.81076  | 2.96434  | 0.87672  |
| C  | 2.95355  | 3.98118  | -0.61953 |
| H  | 1.4536   | 2.89101  | -1.71782 |
| H  | 2.9372   | 1.98882  | -1.52136 |
| C  | 1.54472  | 4.2459   | 1.21657  |
| H  | -0.03569 | 3.19964  | 0.20978  |
| H  | 0.40491  | 2.4714   | 1.772    |
| H  | 3.29645  | 4.5116   | -1.51843 |
| H  | 3.85477  | 3.79352  | 0.00318  |
| H  | 0.86379  | 4.97406  | 1.6798   |
| H  | 2.35294  | 4.04683  | 1.95397  |
| C  | -0.26453 | -2.77181 | 0.17192  |
| C  | -1.00469 | -2.13103 | -2.00786 |
| C  | -0.65562 | -4.20418 | -0.13784 |
| H  | -1.13611 | -2.27029 | 0.61965  |
| H  | 0.56436  | -2.71838 | 0.89572  |
| C  | -1.38169 | -3.57341 | -2.26323 |
| H  | -1.86372 | -1.58434 | -1.58441 |
| H  | -0.70907 | -1.59468 | -2.92052 |
| H  | -1.00108 | -4.71278 | 0.77467  |
| H  | 0.21299  | -4.78456 | -0.51586 |

|    |          |          |          |
|----|----------|----------|----------|
| H  | -2.26337 | -3.63549 | -2.91576 |
| H  | -0.55842 | -4.11025 | -2.78129 |
| N  | 1.66233  | 2.00738  | 0.15902  |
| N  | 0.09264  | -2.01257 | -1.03275 |
| O  | -1.71405 | -4.2468  | -1.06277 |
| O  | 2.07522  | 4.85197  | 0.06172  |
| Cl | 0.89458  | 0.49459  | -2.88901 |
| H  | -1.08815 | 0.70592  | -0.72617 |
| H  | 2.194    | 1.16482  | 1.98676  |
| C  | -2.1914  | -0.14376 | 1.77829  |
| H  | -2.98697 | -0.87102 | 1.95824  |
| C  | -2.39563 | 0.92777  | 0.94429  |
| H  | -1.6311  | 1.70176  | 0.93546  |
| C  | -3.62938 | 1.25527  | 0.24696  |
| C  | -3.74358 | 2.49806  | -0.40431 |
| C  | -4.72789 | 0.37741  | 0.18514  |
| C  | -4.9047  | 2.85421  | -1.07883 |
| H  | -2.88818 | 3.17964  | -0.38744 |
| C  | -5.88972 | 0.73276  | -0.49061 |
| H  | -4.66469 | -0.604   | 0.66213  |
| C  | -5.98627 | 1.97298  | -1.12437 |
| H  | -4.96593 | 3.82286  | -1.58069 |
| H  | -6.72883 | 0.03363  | -0.52911 |
| H  | -6.89817 | 2.24747  | -1.6598  |
| O  | 0.15359  | 0.04126  | 1.63563  |
| C  | -0.85164 | -0.44722 | 2.21254  |
| N  | -0.66857 | -1.35653 | 3.2307   |
| C  | 0.64161  | -1.8713  | 3.52969  |
| H  | 0.9392   | -1.64407 | 4.56688  |
| H  | 0.67891  | -2.96839 | 3.40916  |
| H  | 1.37196  | -1.41689 | 2.85119  |
| C  | -1.77099 | -1.91403 | 3.97051  |
| H  | -2.57696 | -1.17886 | 4.08628  |
| H  | -2.19609 | -2.81876 | 3.49635  |
| H  | -1.43392 | -2.1967  | 4.97744  |

### **B<sub>L2</sub>-TS1**

|    |         |          |          |
|----|---------|----------|----------|
| Ni | 0.59198 | 0.17854  | 0.16389  |
| C  | 3.21082 | -0.69757 | -0.07838 |
| C  | 2.95127 | 1.6441   | 0.00302  |
| C  | 4.59299 | -0.58448 | -0.15487 |
| C  | 4.32906 | 1.82428  | -0.10252 |
| C  | 5.15027 | 0.69842  | -0.17869 |
| H  | 5.22293 | -1.47478 | -0.1991  |

|    |          |          |          |
|----|----------|----------|----------|
| H  | 4.75317  | 2.83005  | -0.10072 |
| H  | 6.23332  | 0.81876  | -0.24534 |
| C  | 2.3837   | -1.94392 | -0.11135 |
| H  | 2.09185  | -2.15051 | -1.15526 |
| H  | 2.94977  | -2.82177 | 0.24356  |
| C  | 1.91191  | 2.66916  | 0.27136  |
| H  | 1.82381  | 2.70579  | 1.38403  |
| H  | 2.17983  | 3.66212  | -0.12295 |
| N  | 2.44386  | 0.40067  | -0.00736 |
| C  | 1.35665  | -1.72313 | 2.12075  |
| C  | 0.10779  | -2.75472 | 0.34414  |
| C  | 1.64761  | -3.10354 | 2.66155  |
| H  | 0.45354  | -1.30339 | 2.58403  |
| H  | 2.14381  | -0.99493 | 2.35907  |
| C  | 0.446    | -4.10131 | 0.95395  |
| H  | -0.84958 | -2.38419 | 0.74272  |
| H  | 0.00269  | -2.84713 | -0.7439  |
| H  | 1.71318  | -3.05759 | 3.75627  |
| H  | 2.62419  | -3.49069 | 2.29908  |
| H  | -0.37506 | -4.80774 | 0.76644  |
| H  | 1.3516   | -4.53041 | 0.47113  |
| C  | 0.40571  | 2.45377  | -1.65738 |
| C  | -0.52372 | 2.87335  | 0.52785  |
| C  | 0.22449  | 3.92745  | -1.97005 |
| H  | -0.48138 | 1.8956   | -1.98503 |
| H  | 1.26023  | 2.02263  | -2.20057 |
| C  | -0.64899 | 4.32785  | 0.14478  |
| H  | -1.45092 | 2.34799  | 0.26133  |
| H  | -0.34456 | 2.71046  | 1.60301  |
| H  | -0.00224 | 4.05126  | -3.03838 |
| H  | 1.15767  | 4.49793  | -1.7767  |
| H  | -1.52034 | 4.77351  | 0.64369  |
| H  | 0.23867  | 4.90765  | 0.47264  |
| N  | 1.1233   | -1.72412 | 0.64876  |
| N  | 0.57748  | 2.19865  | -0.20896 |
| O  | -0.84449 | 4.48342  | -1.24782 |
| O  | 0.62337  | -4.0198  | 2.34151  |
| H  | -1.26419 | -0.05268 | 0.56498  |
| Cl | 1.06581  | 1.32183  | 2.97213  |
| C  | -2.23548 | -1.14292 | -1.51041 |
| H  | -2.89375 | -2.01447 | -1.50969 |
| C  | -2.51817 | -0.06203 | -0.6779  |
| H  | -2.0721  | 0.8949   | -0.96858 |
| C  | -3.74122 | 0.04552  | 0.12026  |



|   |          |          |          |
|---|----------|----------|----------|
| C | -4.32025 | 1.30382  | 0.35732  |
| C | -4.36342 | -1.08559 | 0.67683  |
| C | -5.48674 | 1.4267   | 1.10592  |
| H | -3.84884 | 2.19448  | -0.07011 |
| C | -5.52594 | -0.96292 | 1.42881  |
| H | -3.91026 | -2.07053 | 0.53043  |
| C | -6.09539 | 0.2938   | 1.64537  |
| H | -5.92393 | 2.41438  | 1.27106  |
| H | -5.99009 | -1.85362 | 1.85963  |
| H | -7.00709 | 0.38849  | 2.23962  |
| O | -0.04015 | -0.38588 | -1.81536 |
| C | -0.95333 | -1.19126 | -2.1402  |
| N | -0.68451 | -2.19379 | -3.06364 |
| C | 0.65184  | -2.3788  | -3.55636 |
| H | 0.65016  | -2.54933 | -4.64395 |
| H | 1.23791  | -1.47711 | -3.3464  |
| H | 1.16565  | -3.24549 | -3.093   |
| C | -1.67441 | -3.17496 | -3.41984 |
| H | -1.79167 | -3.97819 | -2.6664  |
| H | -2.65792 | -2.70802 | -3.56632 |
| H | -1.39296 | -3.65217 | -4.36762 |

## **B<sub>6</sub>**

|    |         |          |          |
|----|---------|----------|----------|
| Ni | 0.46424 | 0.1431   | -0.40555 |
| C  | 3.2295  | -0.10267 | 0.37896  |
| C  | 2.43195 | -1.89735 | -0.90513 |
| C  | 4.47943 | -0.70813 | 0.51326  |
| C  | 3.64855 | -2.56811 | -0.79121 |
| C  | 4.67949 | -1.95491 | -0.07813 |
| H  | 5.27558 | -0.21585 | 1.07531  |
| H  | 3.78613 | -3.54753 | -1.25384 |
| H  | 5.64561 | -2.45526 | 0.01916  |
| C  | 2.81762 | 1.19124  | 1.02299  |
| H  | 3.71148 | 1.80285  | 1.24508  |
| C  | 1.22542 | -2.367   | -1.66769 |
| H  | 1.20383 | -1.82498 | -2.62969 |
| H  | 1.30666 | -3.44539 | -1.89128 |
| N  | 2.26999 | -0.70562 | -0.32415 |
| C  | 2.40356 | 2.57331  | -0.95107 |
| C  | 1.02716 | 2.86585  | 0.98946  |
| C  | 3.15795 | 3.82715  | -0.55891 |
| H  | 1.58002 | 2.82694  | -1.6325  |
| H  | 3.04054 | 1.86261  | -1.49994 |
| C  | 1.82559 | 4.10679  | 1.3287   |

|    |          |          |          |
|----|----------|----------|----------|
| H  | 0.17274  | 3.1592   | 0.35702  |
| H  | 0.62364  | 2.3634   | 1.88037  |
| H  | 3.49758  | 4.36161  | -1.45672 |
| H  | 4.06807  | 3.58649  | 0.0326   |
| H  | 1.18991  | 4.84987  | 1.82968  |
| H  | 2.65197  | 3.86361  | 2.03109  |
| C  | -0.22258 | -2.82582 | 0.25233  |
| C  | -1.21805 | -2.09028 | -1.79589 |
| C  | -0.64845 | -4.24111 | -0.08278 |
| H  | -1.02815 | -2.34388 | 0.82765  |
| H  | 0.68839  | -2.80538 | 0.86954  |
| C  | -1.62034 | -3.52264 | -2.07312 |
| H  | -2.02784 | -1.59073 | -1.23867 |
| H  | -1.05089 | -1.51096 | -2.71401 |
| H  | -0.88328 | -4.79029 | 0.84044  |
| H  | 0.16665  | -4.80318 | -0.58847 |
| H  | -2.57169 | -3.55185 | -2.62166 |
| H  | -0.86526 | -4.02885 | -2.71171 |
| N  | 1.8098   | 1.89026  | 0.21528  |
| N  | -0.00992 | -2.0008  | -0.9526  |
| O  | -1.80996 | -4.24909 | -0.87779 |
| O  | 2.33629  | 4.71507  | 0.16454  |
| Cl | 0.33858  | 0.71929  | -2.63037 |
| H  | -1.59161 | 0.61208  | -0.40182 |
| H  | 2.34248  | 0.94126  | 1.98605  |
| C  | -2.07611 | -0.01562 | 1.64136  |
| H  | -3.0069  | -0.28115 | 2.13528  |
| C  | -2.13005 | 0.97353  | 0.52491  |
| H  | -1.59305 | 1.90861  | 0.77186  |
| C  | -3.49532 | 1.35012  | 0.02646  |
| C  | -3.73336 | 2.64273  | -0.46012 |
| C  | -4.55431 | 0.43337  | 0.00293  |
| C  | -4.98356 | 3.0122   | -0.95141 |
| H  | -2.917   | 3.37184  | -0.45047 |
| C  | -5.8075  | 0.79867  | -0.48811 |
| H  | -4.3912  | -0.58101 | 0.37809  |
| C  | -6.02879 | 2.08935  | -0.96728 |
| H  | -5.14465 | 4.02874  | -1.32149 |
| H  | -6.62125 | 0.06804  | -0.49403 |
| H  | -7.01526 | 2.37625  | -1.34576 |
| O  | 0.27046  | -0.08134 | 1.56119  |
| C  | -0.8529  | -0.39782 | 2.14221  |
| N  | -0.71856 | -1.15917 | 3.30998  |
| C  | 0.4762   | -1.92385 | 3.53814  |

|   |          |          |         |
|---|----------|----------|---------|
| H | 0.75097  | -1.91238 | 4.60751 |
| H | 0.37488  | -2.99319 | 3.24523 |
| H | 1.30259  | -1.49    | 2.96153 |
| C | -1.89619 | -1.62019 | 3.98508 |
| H | -2.59942 | -0.78928 | 4.16009 |
| H | -2.44622 | -2.40973 | 3.4252  |
| H | -1.62262 | -2.03503 | 4.96927 |

## B<sub>2</sub>-TS2

|    |          |          |          |
|----|----------|----------|----------|
| Ni | 0.86009  | 0.45385  | -1.22975 |
| C  | -0.4337  | -0.23096 | 1.17133  |
| C  | 1.68922  | -1.26535 | 1.13603  |
| C  | -0.76195 | -0.92669 | 2.35357  |
| C  | 1.41231  | -1.97203 | 2.30165  |
| C  | 0.15797  | -1.80275 | 2.90255  |
| H  | -1.73244 | -0.74873 | 2.82223  |
| H  | 2.18409  | -2.61015 | 2.73445  |
| H  | -0.08577 | -2.34452 | 3.82029  |
| C  | -1.33469 | 0.62889  | 0.45212  |
| H  | -2.17791 | 1.0188   | 1.04313  |
| C  | 3.03018  | -1.33643 | 0.46353  |
| H  | 3.19346  | -2.35352 | 0.06231  |
| H  | 2.99735  | -0.66125 | -0.4248  |
| N  | 0.78137  | -0.44456 | 0.5802   |
| C  | 0.04068  | 2.68617  | 0.40093  |
| C  | -1.45132 | 2.2378   | -1.4239  |
| C  | -0.96854 | 3.6782   | 0.93594  |
| H  | 0.75221  | 3.18837  | -0.27439 |
| H  | 0.62477  | 2.22267  | 1.21074  |
| C  | -2.41438 | 3.25192  | -0.84309 |
| H  | -0.76    | 2.73865  | -2.12138 |
| H  | -1.97426 | 1.4519   | -1.98415 |
| H  | -0.45958 | 4.50683  | 1.44721  |
| H  | -1.63233 | 3.19093  | 1.68023  |
| H  | -2.95853 | 3.76755  | -1.64675 |
| H  | -3.17088 | 2.74672  | -0.20695 |
| C  | 4.024    | 0.22573  | 2.07527  |
| C  | 5.42661  | -1.18701 | 0.76291  |
| C  | 4.39543  | 1.38979  | 1.17784  |
| H  | 4.72149  | 0.1919   | 2.93004  |
| H  | 3.01427  | 0.35407  | 2.49711  |
| C  | 5.7674   | 0.01317  | -0.10675 |
| H  | 6.17917  | -1.2681  | 1.56623  |
| H  | 5.46653  | -2.12317 | 0.18306  |

|    |          |          |          |
|----|----------|----------|----------|
| H  | 4.41365  | 2.33416  | 1.74115  |
| H  | 3.6568   | 1.50724  | 0.35815  |
| H  | 6.79426  | -0.05806 | -0.49347 |
| H  | 5.09028  | 0.07373  | -0.98376 |
| N  | -0.62661 | 1.60913  | -0.37587 |
| N  | 4.11318  | -1.06448 | 1.38925  |
| O  | 5.69198  | 1.20458  | 0.64534  |
| O  | -1.73142 | 4.24149  | -0.10719 |
| Cl | 2.44363  | 1.72913  | -2.1072  |
| H  | -2.96687 | -2.73093 | -0.02421 |
| H  | -1.92076 | -0.26786 | -0.48954 |
| C  | -1.091   | -1.67471 | -1.82723 |
| O  | -0.23681 | -0.83226 | -2.25866 |
| C  | -2.38571 | -1.19632 | -1.42638 |
| H  | -2.78478 | -0.48151 | -2.15697 |
| C  | -3.44072 | -1.97474 | -0.66896 |
| H  | -4.11905 | -2.53774 | -1.33986 |
| C  | -4.2713  | -1.06622 | 0.2052   |
| C  | -4.93043 | 0.04646  | -0.33605 |
| C  | -4.36723 | -1.28042 | 1.58446  |
| C  | -5.64855 | 0.92121  | 0.47595  |
| H  | -4.87508 | 0.23375  | -1.41331 |
| C  | -5.08302 | -0.40656 | 2.4032   |
| H  | -3.86123 | -2.14555 | 2.02514  |
| C  | -5.72247 | 0.70209  | 1.85214  |
| H  | -6.15392 | 1.78299  | 0.0319   |
| H  | -5.13985 | -0.59262 | 3.47887  |
| H  | -6.28238 | 1.38994  | 2.48985  |
| N  | -0.66169 | -2.96217 | -1.62366 |
| C  | -1.52604 | -4.11711 | -1.6778  |
| H  | -2.52392 | -3.84457 | -2.03274 |
| H  | -1.11877 | -4.85033 | -2.39225 |
| H  | -1.62335 | -4.62551 | -0.70361 |
| C  | 0.75107  | -3.25217 | -1.69207 |
| H  | 1.06333  | -3.58125 | -2.69805 |
| H  | 1.32793  | -2.35565 | -1.44379 |
| H  | 1.00128  | -4.04973 | -0.97637 |

### **B<sub>3</sub>-TS1**

|    |          |          |          |
|----|----------|----------|----------|
| Ni | -0.28432 | -0.1973  | -0.63044 |
| C  | -0.3029  | -2.51442 | 1.05609  |
| C  | -2.44891 | -1.73954 | 0.5085   |
| C  | -0.84394 | -3.52748 | 1.85036  |
| C  | -3.05059 | -2.70926 | 1.30384  |

|    |          |          |          |
|----|----------|----------|----------|
| C  | -2.22747 | -3.61357 | 1.97851  |
| H  | -0.18441 | -4.22453 | 2.37047  |
| H  | -4.13778 | -2.75953 | 1.38902  |
| H  | -2.66993 | -4.38816 | 2.60865  |
| C  | 1.15417  | -2.22445 | 0.9053   |
| H  | 1.75207  | -3.14518 | 1.0282   |
| C  | -3.17605 | -0.7467  | -0.35439 |
| H  | -3.2614  | -1.16738 | -1.37207 |
| H  | -4.21305 | -0.61363 | 0.00419  |
| N  | -1.11565 | -1.66354 | 0.41314  |
| C  | 1.43844  | -2.38555 | -1.53601 |
| C  | 2.68505  | -0.72934 | -0.30255 |
| C  | 2.70033  | -3.22068 | -1.61612 |
| H  | 1.36804  | -1.72968 | -2.4179  |
| H  | 0.53783  | -3.02138 | -1.52033 |
| C  | 3.90153  | -1.61906 | -0.43312 |
| H  | 2.64565  | -0.00869 | -1.13509 |
| H  | 2.70598  | -0.16979 | 0.64446  |
| H  | 2.71719  | -3.79594 | -2.55264 |
| H  | 2.74035  | -3.95878 | -0.78573 |
| H  | 4.81401  | -1.01143 | -0.497   |
| H  | 4.00632  | -2.27057 | 0.46055  |
| C  | -2.5142  | 1.32343  | 0.76244  |
| C  | -2.83979 | 1.33317  | -1.61554 |
| C  | -3.87099 | 1.98115  | 0.91657  |
| H  | -1.73947 | 2.10339  | 0.69743  |
| H  | -2.2658  | 0.69547  | 1.63224  |
| C  | -4.19045 | 1.97728  | -1.39054 |
| H  | -2.06814 | 2.10454  | -1.75658 |
| H  | -2.81741 | 0.71561  | -2.52448 |
| H  | -3.86809 | 2.65662  | 1.78268  |
| H  | -4.66232 | 1.22411  | 1.10519  |
| H  | -4.43821 | 2.65147  | -2.22151 |
| H  | -4.99416 | 1.21093  | -1.34674 |
| N  | 1.42791  | -1.50615 | -0.34847 |
| N  | -2.4207  | 0.50883  | -0.46713 |
| O  | -4.19519 | 2.75337  | -0.21352 |
| O  | 3.84721  | -2.41001 | -1.60199 |
| Cl | 0.27441  | 0.7382   | -2.58434 |
| C  | 0.75778  | 1.03074  | 1.88047  |
| H  | -0.17051 | 1.51082  | 2.30963  |
| H  | 0.22604  | 0.57981  | 0.87312  |
| O  | 1.30374  | 0.11436  | 2.608    |
| C  | 1.65149  | 2.12599  | 1.32242  |

|   |         |          |          |
|---|---------|----------|----------|
| C | 2.86039 | 2.39553  | 1.9696   |
| C | 1.30174 | 2.87723  | 0.19656  |
| C | 3.69731 | 3.41072  | 1.50984  |
| H | 3.1226  | 1.78191  | 2.83612  |
| C | 2.139   | 3.88738  | -0.27065 |
| H | 0.38522 | 2.63407  | -0.35424 |
| C | 3.33835 | 4.16078  | 0.38936  |
| H | 4.63903 | 3.61785  | 2.0259   |
| H | 1.86317 | 4.45184  | -1.16505 |
| H | 3.99808 | 4.95096  | 0.02182  |
| H | 1.36732 | -0.81141 | 2.11666  |

#### **B<sub>4</sub>-TS2**

|    |          |          |          |
|----|----------|----------|----------|
| Ni | -0.40504 | -1.23339 | -0.56748 |
| C  | 0.37257  | -0.74465 | 2.0964   |
| C  | -1.95785 | -1.0519  | 1.83019  |
| C  | 0.18626  | -0.43148 | 3.45775  |
| C  | -2.19786 | -0.73266 | 3.15494  |
| C  | -1.09482 | -0.42529 | 3.97885  |
| H  | 1.05178  | -0.18961 | 4.07855  |
| H  | -3.2163  | -0.73129 | 3.54846  |
| H  | -1.25462 | -0.18335 | 5.03212  |
| C  | 1.61949  | -0.65282 | 1.37118  |
| H  | 2.52148  | -0.71284 | 2.00214  |
| C  | -3.00595 | -1.49548 | 0.84398  |
| H  | -3.09368 | -2.59468 | 0.90366  |
| H  | -3.99659 | -1.09863 | 1.13251  |
| N  | -0.70972 | -1.05431 | 1.32717  |
| C  | 1.69836  | -2.93911 | 0.49625  |
| C  | 2.67454  | -1.18981 | -0.79914 |
| C  | 3.08963  | -3.32116 | 0.96391  |
| H  | 1.45349  | -3.49687 | -0.42375 |
| H  | 0.93745  | -3.1858  | 1.25304  |
| C  | 4.04023  | -1.60139 | -0.29714 |
| H  | 2.42761  | -1.72972 | -1.72579 |
| H  | 2.63498  | -0.12368 | -1.03669 |
| H  | 3.15624  | -4.40649 | 1.125    |
| H  | 3.30843  | -2.83492 | 1.9376   |
| H  | 4.80002  | -1.43343 | -1.073   |
| H  | 4.34022  | -0.99626 | 0.58313  |
| C  | -2.87374 | 0.26099  | -0.85509 |
| C  | -3.24704 | -2.00308 | -1.55806 |
| C  | -4.34264 | 0.53894  | -1.09166 |
| H  | -2.29524 | 0.49077  | -1.76506 |

|    |          |          |          |
|----|----------|----------|----------|
| H  | -2.47856 | 0.88499  | -0.03988 |
| C  | -4.71049 | -1.66465 | -1.75415 |
| H  | -2.68894 | -1.8289  | -2.49213 |
| H  | -3.11193 | -3.06127 | -1.28594 |
| H  | -4.47817 | 1.57345  | -1.43592 |
| H  | -4.92282 | 0.43883  | -0.14897 |
| H  | -5.13607 | -2.25273 | -2.57922 |
| H  | -5.29602 | -1.91511 | -0.84223 |
| N  | 1.61269  | -1.49578 | 0.17296  |
| N  | -2.61651 | -1.15891 | -0.53146 |
| O  | -4.87822 | -0.30682 | -2.08419 |
| O  | 4.0658   | -2.9826  | 0.01091  |
| Cl | -0.07827 | -0.94339 | -2.75391 |
| H  | 0.56404  | 1.41435  | -1.18087 |
| H  | 1.72773  | 0.56174  | 0.91715  |
| C  | 3.37324  | 1.95843  | 0.18724  |
| O  | 4.1185   | 1.88079  | 1.16797  |
| C  | 1.92012  | 1.95382  | 0.42501  |
| H  | 1.77894  | 2.36376  | 1.43257  |
| C  | 0.80485  | 2.28379  | -0.52761 |
| H  | 1.09784  | 3.07019  | -1.24567 |
| C  | -0.49924 | 2.71021  | 0.09677  |
| C  | -1.43595 | 3.38797  | -0.69965 |
| C  | -0.8587  | 2.41741  | 1.41804  |
| C  | -2.68385 | 3.75051  | -0.20306 |
| H  | -1.17501 | 3.62848  | -1.73502 |
| C  | -2.1127  | 2.77348  | 1.91987  |
| H  | -0.15565 | 1.90014  | 2.07463  |
| C  | -3.033   | 3.43857  | 1.11317  |
| H  | -3.39047 | 4.2822   | -0.84599 |
| H  | -2.36475 | 2.52938  | 2.95557  |
| H  | -4.01145 | 3.72356  | 1.50773  |
| N  | 3.92258  | 1.96745  | -1.09322 |
| C  | 3.20523  | 2.00378  | -2.34516 |
| H  | 2.98056  | 3.02834  | -2.69364 |
| H  | 3.82599  | 1.532    | -3.12106 |
| H  | 2.26985  | 1.43342  | -2.31997 |
| C  | 5.35773  | 2.05938  | -1.21304 |
| H  | 5.65872  | 2.98723  | -1.72879 |
| H  | 5.7964   | 2.04976  | -0.21092 |
| H  | 5.76393  | 1.21264  | -1.79196 |

## **B<sub>5</sub>-TS2**

|    |         |         |          |
|----|---------|---------|----------|
| Ni | 0.53269 | 0.09074 | -0.50502 |
|----|---------|---------|----------|

|    |          |          |          |
|----|----------|----------|----------|
| C  | 1.15386  | 2.52596  | 0.76994  |
| C  | 3.02674  | 1.53256  | -0.29328 |
| C  | 2.00556  | 3.48772  | 1.36416  |
| C  | 3.91012  | 2.44405  | 0.26925  |
| C  | 3.36324  | 3.44207  | 1.09706  |
| H  | 1.58857  | 4.24645  | 2.02941  |
| H  | 4.98417  | 2.37465  | 0.08961  |
| H  | 4.02462  | 4.18463  | 1.55112  |
| C  | -0.23677 | 2.27739  | 1.04629  |
| H  | -0.77684 | 3.09576  | 1.54581  |
| C  | 3.36906  | 0.32245  | -1.1145  |
| H  | 3.0197   | 0.4707   | -2.15094 |
| H  | 4.46096  | 0.16191  | -1.14691 |
| N  | 1.71455  | 1.6247   | -0.07207 |
| C  | -1.03453 | 2.52295  | -1.30024 |
| C  | -2.28226 | 1.17635  | 0.22151  |
| C  | -2.03697 | 3.63411  | -1.09284 |
| H  | -1.34281 | 1.88326  | -2.14099 |
| H  | -0.03562 | 2.91139  | -1.5464  |
| C  | -3.27455 | 2.31399  | 0.36774  |
| H  | -2.60086 | 0.51917  | -0.60283 |
| H  | -2.25843 | 0.56765  | 1.13678  |
| H  | -2.14454 | 4.23283  | -2.00805 |
| H  | -1.6976  | 4.32281  | -0.29015 |
| H  | -4.28707 | 1.91273  | 0.51748  |
| H  | -3.03167 | 2.93072  | 1.25978  |
| C  | 3.04578  | -1.24099 | 0.76207  |
| C  | 2.70819  | -2.0139  | -1.48306 |
| C  | 4.39727  | -1.92471 | 0.75816  |
| H  | 2.28526  | -1.93736 | 1.15081  |
| H  | 3.03652  | -0.36073 | 1.4214   |
| C  | 4.06697  | -2.67942 | -1.42118 |
| H  | 1.94227  | -2.73449 | -1.15061 |
| H  | 2.43275  | -1.70607 | -2.50124 |
| H  | 4.64523  | -2.28865 | 1.765    |
| H  | 5.199    | -1.21221 | 0.46887  |
| H  | 4.06963  | -3.60168 | -2.01813 |
| H  | 4.85064  | -2.01865 | -1.84804 |
| N  | -0.92817 | 1.6551   | -0.1016  |
| N  | 2.61723  | -0.84257 | -0.59342 |
| O  | 4.40321  | -3.04197 | -0.09954 |
| O  | -3.31415 | 3.11813  | -0.78584 |
| Cl | 0.21687  | -0.23828 | -2.73099 |
| H  | 0.01053  | 0.92632  | 1.6974   |



|   |          |          |          |
|---|----------|----------|----------|
| H | -2.14882 | -3.5012  | 1.34556  |
| C | -0.54037 | -1.13703 | 1.77141  |
| O | 0.35301  | -0.12731 | 1.65363  |
| C | -0.59734 | -2.07439 | 0.77502  |
| H | 0.21331  | -2.02619 | 0.03512  |
| C | -1.71454 | -3.02857 | 0.45281  |
| H | -1.31194 | -3.85706 | -0.15047 |
| C | -2.8124  | -2.33803 | -0.32121 |
| C | -2.62224 | -2.01127 | -1.66949 |
| C | -3.99842 | -1.93302 | 0.30224  |
| C | -3.58263 | -1.28749 | -2.37139 |
| H | -1.68833 | -2.28798 | -2.16626 |
| C | -4.96756 | -1.21535 | -0.40004 |
| H | -4.16451 | -2.18309 | 1.3559   |
| C | -4.7605  | -0.88515 | -1.73906 |
| H | -3.39757 | -1.02429 | -3.41584 |
| H | -5.8891  | -0.90977 | 0.10317  |
| H | -5.51279 | -0.31323 | -2.28757 |
| N | -1.29187 | -1.14983 | 2.92802  |
| C | -1.70242 | -2.39133 | 3.53233  |
| H | -1.07245 | -3.2158  | 3.17484  |
| H | -1.5779  | -2.32567 | 4.6244   |
| H | -2.75855 | -2.65356 | 3.34049  |
| C | -1.45735 | 0.02592  | 3.74679  |
| H | -0.78914 | 0.02272  | 4.62744  |
| H | -1.25971 | 0.94283  | 3.17956  |
| H | -2.49324 | 0.08935  | 4.11631  |

## F<sub>2</sub>

|    |          |          |          |
|----|----------|----------|----------|
| Ni | 0.28415  | -0.19691 | 0.63016  |
| C  | 0.30266  | -2.51428 | -1.05596 |
| C  | 2.44871  | -1.73986 | -0.50787 |
| C  | 0.84367  | -3.52748 | -1.8501  |
| C  | 3.05037  | -2.70978 | -1.30298 |
| C  | 2.22721  | -3.61391 | -1.97785 |
| H  | 0.18411  | -4.22439 | -2.37036 |
| H  | 4.13757  | -2.76033 | -1.38784 |
| H  | 2.66966  | -4.38864 | -2.60782 |
| C  | -1.15437 | -2.22417 | -0.90524 |
| H  | -1.75239 | -3.14483 | -1.02811 |
| C  | 3.17582  | -0.74693 | 0.35494  |
| H  | 3.26081  | -1.16725 | 1.37279  |
| H  | 4.21292  | -0.61415 | -0.00344 |
| N  | 1.11544  | -1.66354 | -0.41287 |

|    |          |          |          |
|----|----------|----------|----------|
| C  | -1.43857 | -2.38516 | 1.53609  |
| C  | -2.68526 | -0.72912 | 0.30264  |
| C  | -2.7004  | -3.22041 | 1.61621  |
| H  | -1.36823 | -1.72926 | 2.41796  |
| H  | -0.53793 | -3.02094 | 1.52046  |
| C  | -3.90164 | -1.61898 | 0.43295  |
| H  | -2.64602 | -0.00868 | 1.13537  |
| H  | -2.70614 | -0.16921 | -0.64413 |
| H  | -2.71727 | -3.79554 | 2.5528   |
| H  | -2.74027 | -3.95863 | 0.78592  |
| H  | -4.81422 | -1.01147 | 0.49665  |
| H  | -4.00618 | -2.27053 | -0.46072 |
| C  | 2.51474  | 1.32294  | -0.76279 |
| C  | 2.83964  | 1.33347  | 1.61526  |
| C  | 3.87176  | 1.98024  | -0.91678 |
| H  | 1.74017  | 2.10309  | -0.69827 |
| H  | 2.26643  | 0.69473  | -1.63245 |
| C  | 4.19058  | 1.97704  | 1.39045  |
| H  | 2.06824  | 2.1052   | 1.75566  |
| H  | 2.81663  | 0.71632  | 2.52446  |
| H  | 3.86926  | 2.65545  | -1.7831  |
| H  | 4.66289  | 1.2229   | -1.10501 |
| H  | 4.4383   | 2.65146  | 2.22125  |
| H  | 4.99406  | 1.21041  | 1.34719  |
| N  | -1.42806 | -1.50578 | 0.34854  |
| N  | 2.42068  | 0.50879  | 0.46703  |
| O  | 4.19594  | 2.75271  | 0.21315  |
| O  | -3.8474  | -2.40989 | 1.60187  |
| Cl | -0.27434 | 0.73883  | 2.58404  |
| H  | -1.41644 | -1.52521 | -1.73761 |

## H-TS

|    |          |          |          |
|----|----------|----------|----------|
| Ni | -0.00067 | -0.83031 | -0.31932 |
| C  | 1.04346  | 1.85423  | -0.33133 |
| C  | -1.08746 | 1.669    | 0.62576  |
| C  | 1.07811  | 3.22411  | -0.08308 |
| C  | -1.12634 | 3.03641  | 0.88953  |
| C  | -0.0257  | 3.81683  | 0.53238  |
| H  | 1.95092  | 3.81508  | -0.36842 |
| H  | -1.99972 | 3.48018  | 1.37203  |
| H  | -0.02753 | 4.88988  | 0.73534  |
| C  | 2.09968  | 1.04641  | -1.0267  |
| H  | 3.05202  | 1.60757  | -1.07691 |
| C  | -2.14556 | 0.66595  | 0.98625  |

|    |          |          |          |
|----|----------|----------|----------|
| H  | -1.82726 | 0.16167  | 1.91717  |
| H  | -3.10724 | 1.17325  | 1.19132  |
| N  | -0.02163 | 1.12648  | 0.02524  |
| C  | 2.83815  | -0.22705 | 0.92976  |
| C  | 2.89933  | -1.26821 | -1.22932 |
| C  | 4.33666  | -0.02516 | 0.83784  |
| H  | 2.60803  | -1.17854 | 1.43047  |
| H  | 2.35261  | 0.55748  | 1.53088  |
| C  | 4.39641  | -1.0405  | -1.26114 |
| H  | 2.6868   | -2.25494 | -0.78583 |
| H  | 2.45057  | -1.26191 | -2.23394 |
| H  | 4.7963   | -0.09121 | 1.8338   |
| H  | 4.58254  | 0.98218  | 0.43717  |
| H  | 4.90289  | -1.84803 | -1.80788 |
| H  | 4.63506  | -0.09289 | -1.79142 |
| C  | -2.75185 | 0.10117  | -1.32277 |
| C  | -2.97955 | -1.56213 | 0.38666  |
| C  | -4.25098 | 0.31655  | -1.27131 |
| H  | -2.50157 | -0.65933 | -2.07794 |
| H  | -2.21599 | 1.01706  | -1.61727 |
| C  | -4.47063 | -1.30289 | 0.39396  |
| H  | -2.74999 | -2.36434 | -0.33356 |
| H  | -2.59713 | -1.89439 | 1.36202  |
| H  | -4.63877 | 0.58342  | -2.26454 |
| H  | -4.5038  | 1.1594   | -0.59174 |
| H  | -5.0252  | -2.22356 | 0.62251  |
| H  | -4.73636 | -0.56418 | 1.18033  |
| N  | 2.20769  | -0.27419 | -0.40021 |
| N  | -2.21925 | -0.37867 | -0.03863 |
| O  | -4.92235 | -0.8535  | -0.86563 |
| O  | 4.93761  | -1.02048 | 0.03995  |
| Cl | 0.07113  | -1.87418 | 1.73063  |
| H  | -0.05152 | -0.91176 | -1.91591 |
| H  | 1.76178  | 0.87578  | -2.06571 |

**<sup>t</sup>BuOK**

|   |          |          |          |
|---|----------|----------|----------|
| C | -1.05587 | -0.00008 | -0.00003 |
| C | -1.6006  | 1.09544  | 0.93538  |
| H | -1.22825 | 0.93339  | 1.95948  |
| H | -1.24242 | 2.08458  | 0.60611  |
| H | -2.7023  | 1.1326   | 0.97724  |
| C | -1.59796 | -1.35869 | 0.48085  |
| H | -1.2307  | -2.1619  | -0.1766  |
| H | -1.23044 | -1.57071 | 1.49723  |

|   |          |          |          |
|---|----------|----------|----------|
| H | -2.70026 | -1.41189 | 0.50031  |
| C | -1.59762 | 0.26201  | -1.41697 |
| H | -1.23614 | 1.23622  | -1.78352 |
| H | -1.22422 | -0.50977 | -2.10888 |
| H | -2.69951 | 0.26682  | -1.47502 |
| O | 0.30842  | 0.00011  | 0.00013  |
| K | 2.53364  | 0.00041  | 0.00038  |

### BnOH

|   |          |         |          |
|---|----------|---------|----------|
| C | -3.04805 | 1.9697  | 0.       |
| C | -1.65289 | 1.9697  | 0.       |
| C | -0.95535 | 3.17745 | 0.       |
| C | -1.65301 | 4.38596 | -0.0012  |
| C | -3.04783 | 4.38588 | -0.00168 |
| C | -3.74543 | 3.17767 | -0.00068 |
| H | -3.59781 | 1.01738 | 0.00045  |
| H | -1.10338 | 1.01718 | 0.00132  |
| H | -1.10281 | 5.3381  | -0.00126 |
| H | -3.59796 | 5.33816 | -0.00263 |
| H | -4.84504 | 3.17786 | -0.00086 |
| C | 0.58465  | 3.17756 | 0.00089  |
| H | 0.94182  | 3.56865 | -0.92883 |
| H | 0.9408   | 3.78739 | 0.80473  |
| O | 1.06131  | 1.83998 | 0.16995  |
| H | 2.02125  | 1.84084 | 0.18075  |

### KCl

|    |          |         |         |
|----|----------|---------|---------|
| Cl | -3.40018 | 3.41792 | 1.92948 |
| K  | -4.86228 | 5.61857 | 3.2426  |

### H<sub>2</sub>O

|   |    |          |          |
|---|----|----------|----------|
| O | 0. | 0.       | 0.11849  |
| H | 0. | 0.75464  | -0.47394 |
| H | 0. | -0.75464 | -0.47394 |

### <sup>t</sup>BuOH

|   |          |          |          |
|---|----------|----------|----------|
| C | -4.99474 | -1.00611 | -3.85075 |
| O | -3.60578 | -0.65048 | -3.82766 |
| C | -5.66778 | 0.0204   | -4.74325 |
| C | -5.14096 | -2.40793 | -4.42521 |
| C | -5.55267 | -0.94292 | -2.43445 |
| H | -5.24638 | -0.00983 | -5.75767 |
| H | -6.74769 | -0.16599 | -4.8172  |
| H | -5.5292  | 1.03562  | -4.34435 |

|   |          |          |          |
|---|----------|----------|----------|
| H | -5.41747 | 0.06007  | -2.00487 |
| H | -6.62624 | -1.17974 | -2.41194 |
| H | -5.04306 | -1.66429 | -1.77818 |
| H | -4.63212 | -3.14669 | -3.78758 |
| H | -6.19688 | -2.70526 | -4.49783 |
| H | -4.69617 | -2.46706 | -5.42842 |
| H | -3.10602 | -1.35453 | -3.35281 |

### PhCHO

|   |          |         |          |
|---|----------|---------|----------|
| C | -3.04805 | 1.9697  | 0.       |
| C | -1.65289 | 1.9697  | 0.       |
| C | -0.95535 | 3.17745 | 0.       |
| C | -1.65301 | 4.38596 | -0.0012  |
| C | -3.04783 | 4.38588 | -0.00168 |
| C | -3.74543 | 3.17767 | -0.00068 |
| H | -3.59781 | 1.01738 | 0.00045  |
| H | -1.10338 | 1.01718 | 0.00132  |
| H | -1.10281 | 5.3381  | -0.00126 |
| H | -3.59796 | 5.33816 | -0.00263 |
| H | -4.84504 | 3.17786 | -0.00086 |
| C | 0.58465  | 3.17756 | 0.00089  |
| H | 1.11788  | 2.24989 | 0.0015   |
| O | 1.21808  | 4.26491 | 0.00089  |

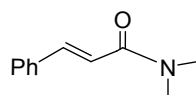

|   |          |         |          |
|---|----------|---------|----------|
| C | 3.6558   | 2.38244 | -0.1943  |
| O | 4.65877  | 2.49818 | 0.50236  |
| C | 2.32938  | 2.49938 | 0.45505  |
| H | 2.37379  | 2.1989  | 1.50726  |
| C | 1.2051   | 3.05291 | -0.03669 |
| H | 1.21341  | 3.44571 | -1.0593  |
| C | -0.06988 | 3.19536 | 0.65788  |
| C | -1.08429 | 3.97925 | 0.08154  |
| C | -0.35159 | 2.54847 | 1.87577  |
| C | -2.32404 | 4.12527 | 0.69879  |
| H | -0.8863  | 4.48424 | -0.86855 |
| C | -1.59257 | 2.68282 | 2.48695  |
| H | 0.41176  | 1.92598 | 2.34931  |
| C | -2.58642 | 3.47334 | 1.90297  |
| H | -3.09166 | 4.74971 | 0.23474  |
| H | -1.78829 | 2.16631 | 3.4302   |
| H | -3.55927 | 3.58157 | 2.38855  |

|   |         |         |          |
|---|---------|---------|----------|
| N | 3.73438 | 2.14506 | -1.55048 |
| C | 2.64456 | 1.76127 | -2.41983 |
| H | 2.32405 | 2.58774 | -3.07917 |
| H | 2.97802 | 0.93793 | -3.07271 |
| H | 1.77283 | 1.39086 | -1.86004 |
| C | 5.03966 | 2.14846 | -2.16636 |
| H | 5.31963 | 1.13854 | -2.51189 |
| H | 5.05423 | 2.81613 | -3.04239 |
| H | 5.7825  | 2.48788 | -1.43855 |

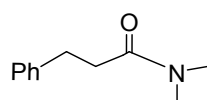

|                 |          |          |          |
|-----------------|----------|----------|----------|
| C               | 2.25296  | 0.77618  | -0.10991 |
| O               | 2.77945  | 1.77337  | -0.58511 |
| C               | 0.79636  | 0.80701  | 0.16963  |
| H               | 0.43379  | 1.71383  | -0.26756 |
| C               | -0.08706 | -0.14837 | -0.17838 |
| H               | 0.13153  | -0.37935 | -1.20002 |
| C               | -1.54237 | -0.07694 | -0.09966 |
| C               | -2.30549 | -1.17782 | -0.52723 |
| C               | -2.22777 | 1.04819  | 0.39588  |
| C               | -3.69568 | -1.16053 | -0.4628  |
| H               | -1.78924 | -2.05939 | -0.91845 |
| C               | -3.61482 | 1.06533  | 0.4612   |
| H               | -1.66373 | 1.92089  | 0.73289  |
| C               | -4.35683 | -0.03837 | 0.03272  |
| H               | -4.26674 | -2.02794 | -0.80195 |
| H               | -4.12671 | 1.94897  | 0.84967  |
| H               | -5.44774 | -0.02026 | 0.08416  |
| N               | 2.95767  | -0.38494 | 0.12445  |
| C               | 2.50544  | -1.4948  | 0.92573  |
| H               | 2.29735  | -2.39607 | 0.32262  |
| H               | 3.28372  | -1.76596 | 1.65707  |
| H               | 1.60042  | -1.23959 | 1.48598  |
| C               | 4.3308   | -0.45528 | -0.31361 |
| H               | 5.02807  | -0.45405 | 0.54101  |
| H               | 4.50626  | -1.37738 | -0.88954 |
| H               | 4.55051  | 0.41286  | -0.94207 |
| H               | 0.1867   | -1.01063 | 0.39299  |
| H               | 0.70432  | 0.91825  | 1.22984  |
| C <sub>HO</sub> |          |          |          |
| Ni              | -0.12266 | 0.27542  | -0.56032 |

|   |          |          |          |
|---|----------|----------|----------|
| C | 0.00325  | 1.99702  | 1.71996  |
| C | -1.37819 | 0.12298  | 1.94082  |
| C | -0.428   | 2.50867  | 2.94205  |
| C | -1.85833 | 0.58847  | 3.16479  |
| C | -1.3815  | 1.79777  | 3.66651  |
| H | -0.02153 | 3.45145  | 3.31384  |
| H | -2.59633 | 0.00025  | 3.71484  |
| H | -1.74568 | 2.18076  | 4.62233  |
| C | 0.98976  | 2.68248  | 0.81932  |
| H | 1.58805  | 3.41627  | 1.39005  |
| C | -1.79774 | -1.18174 | 1.3265   |
| H | -0.90199 | -1.81464 | 1.22965  |
| H | -2.4782  | -1.70446 | 2.02912  |
| N | -0.4783  | 0.83668  | 1.24457  |
| C | 2.7478   | 0.97177  | 0.96631  |
| C | 2.52473  | 2.24858  | -1.05093 |
| C | 3.94033  | 1.83121  | 1.33822  |
| H | 3.09515  | 0.09169  | 0.40504  |
| H | 2.22521  | 0.60505  | 1.86408  |
| C | 3.71362  | 3.07536  | -0.61728 |
| H | 2.87545  | 1.39271  | -1.65012 |
| H | 1.80651  | 2.80425  | -1.66758 |
| H | 4.6748   | 1.2341   | 1.89656  |
| H | 3.634    | 2.66923  | 2.00205  |
| H | 4.29022  | 3.40824  | -1.49106 |
| H | 3.3827   | 3.99109  | -0.08192 |
| C | -3.73452 | -0.52932 | 0.01158  |
| C | -2.24356 | -2.18025 | -0.864   |
| C | -4.71277 | -1.64213 | 0.35112  |
| H | -3.9716  | -0.129   | -0.98869 |
| H | -3.83568 | 0.30748  | 0.72288  |
| C | -3.24139 | -3.25023 | -0.47953 |
| H | -2.46022 | -1.85709 | -1.89643 |
| H | -1.20026 | -2.52802 | -0.85442 |
| H | -5.75051 | -1.29285 | 0.25137  |
| H | -4.58431 | -1.96456 | 1.40727  |
| H | -3.20804 | -4.09602 | -1.18057 |
| H | -3.01459 | -3.65531 | 0.53038  |
| N | 1.79348  | 1.68684  | 0.10002  |
| N | -2.34548 | -0.99445 | -0.00841 |
| O | -4.5617  | -2.74381 | -0.51128 |
| O | 4.59253  | 2.32929  | 0.19569  |
| H | 0.42359  | 3.22507  | 0.04043  |
| C | -1.10149 | 3.06345  | -2.53405 |

|   |          |          |          |
|---|----------|----------|----------|
| H | -0.65942 | 3.90896  | -1.94356 |
| H | -2.18003 | 3.36153  | -2.63282 |
| O | -0.91853 | 1.87248  | -1.90312 |
| C | -0.493   | 3.14149  | -3.92033 |
| C | -0.79699 | 4.1957   | -4.79049 |
| C | 0.38413  | 2.14459  | -4.35548 |
| C | -0.23974 | 4.25191  | -6.066   |
| H | -1.4866  | 4.98161  | -4.4618  |
| C | 0.94438  | 2.19832  | -5.63205 |
| H | 0.60871  | 1.32593  | -3.66708 |
| C | 0.63429  | 3.2502   | -6.49257 |
| H | -0.48991 | 5.07981  | -6.73492 |
| H | 1.62901  | 1.41082  | -5.95918 |
| H | 1.06921  | 3.29043  | -7.4943  |
| C | 1.10865  | -2.60015 | 1.07189  |
| C | 1.21727  | -3.50819 | -0.15251 |
| H | 1.59835  | -4.51014 | 0.09953  |
| H | 0.2313   | -3.62778 | -0.62676 |
| H | 1.8918   | -3.06183 | -0.89738 |
| C | 0.14011  | -3.21186 | 2.08786  |
| H | 0.4886   | -4.17385 | 2.49764  |
| H | 0.00857  | -2.50771 | 2.92313  |
| H | -0.84805 | -3.37838 | 1.62983  |
| C | 2.48543  | -2.42592 | 1.71441  |
| H | 3.19198  | -1.99317 | 0.9911   |
| H | 2.4067   | -1.72454 | 2.55987  |
| H | 2.91322  | -3.36937 | 2.09106  |
| O | 0.62035  | -1.36541 | 0.65113  |

Cat.4-1

|    |         |         |        |
|----|---------|---------|--------|
| Ni | -0.0335 | -0.0055 | -1.32  |
| Cl | 1.5285  | -1.8615 | -1.373 |
| Cl | -1.5355 | 1.8445  | -1.591 |
| O  | 2.6365  | 3.5475  | -1.895 |
| O  | -2.3655 | -3.3455 | -3.332 |
| O  | 0.2765  | 0.1455  | -3.317 |
| H  | 0.1425  | 0.8955  | -3.745 |
| H  | 0.6055  | -0.4945 | -3.809 |
| N  | -0.3485 | -0.1975 | 0.64   |
| N  | 1.7205  | 1.2515  | -0.384 |
| N  | -1.9645 | -1.3775 | -1.23  |
| C  | 3.0265  | 1.2895  | -1.098 |
| H  | 3.2645  | 0.3765  | -1.399 |
| H  | 3.7325  | 1.6015  | -0.478 |
| C  | 2.9655  | 2.2105  | -2.292 |



|                 |          |          |          |
|-----------------|----------|----------|----------|
| H               | 3.8415   | 2.2105   | -2.753   |
| H               | 2.2835   | 1.8795   | -2.929   |
| C               | 1.3605   | 3.5535   | -1.234   |
| H               | 0.6615   | 3.2565   | -1.869   |
| H               | 1.1435   | 4.4775   | -0.952   |
| C               | 1.3535   | 2.6445   | -0.02    |
| H               | 1.9945   | 2.9885   | 0.651    |
| H               | 0.4515   | 2.6505   | 0.389    |
| C               | 1.9385   | 0.4955   | 0.872    |
| H               | 2.4485   | 1.0575   | 1.508    |
| H               | 2.4775   | -0.3125  | 0.679    |
| C               | 0.6375   | 0.0865   | 1.503    |
| C               | 0.4625   | -0.0555  | 2.876    |
| H               | 1.1665   | 0.1485   | 3.48     |
| C               | -0.7615  | -0.4995  | 3.341    |
| H               | -0.9055  | -0.6015  | 4.275    |
| C               | -1.7815  | -0.7985  | 2.446    |
| H               | -2.6255  | -1.1065  | 2.755    |
| C               | -1.5365  | -0.6335  | 1.087    |
| C               | -2.5705  | -0.8535  | 0.018    |
| H               | -3.2495  | -1.4945  | 0.347    |
| H               | -3.0285  | 0.0035   | -0.175   |
| C               | -1.6945  | -2.8285  | -1.048   |
| H               | -2.4965  | -3.2625  | -0.664   |
| H               | -0.9495  | -2.9425  | -0.406   |
| C               | -1.3355  | -3.5115  | -2.351   |
| H               | -0.4895  | -3.1325  | -2.697   |
| H               | -1.1935  | -4.4775  | -2.186   |
| C               | -2.5455  | -1.9495  | -3.572   |
| H               | -3.2305  | -1.8215  | -4.275   |
| H               | -1.6955  | -1.5585  | -3.897   |
| C               | -2.9795  | -1.2335  | -2.306   |
| H               | -3.1155  | -0.2725  | -2.502   |
| H               | -3.8415  | -1.6075  | -1.996   |
| C <sub>L1</sub> |          |          |          |
| Ni              | -0.54905 | -0.03217 | -0.09812 |
| C               | -3.29596 | -0.09068 | -0.42471 |
| C               | -2.3144  | -2.10758 | 0.29891  |
| C               | -4.57    | -0.6373  | -0.33665 |
| C               | -3.56038 | -2.71958 | 0.37056  |
| C               | -4.69822 | -1.97035 | 0.0627   |
| H               | -5.44593 | -0.03802 | -0.59161 |
| H               | -3.64039 | -3.76331 | 0.67966  |

|    |          |          |          |
|----|----------|----------|----------|
| H  | -5.68722 | -2.42738 | 0.1294   |
| C  | -2.9215  | 1.24823  | -0.97735 |
| H  | -3.71089 | 1.99837  | -0.80241 |
| C  | -0.99528 | -2.6793  | 0.69425  |
| H  | -0.86133 | -2.45149 | 1.76875  |
| H  | -0.95302 | -3.77186 | 0.54844  |
| N  | -2.21861 | -0.82367 | -0.09521 |
| C  | -1.72826 | 2.38731  | 0.84515  |
| C  | -0.90126 | 2.57605  | -1.41343 |
| C  | -2.33084 | 3.76683  | 0.6897   |
| H  | -0.71866 | 2.44831  | 1.27435  |
| H  | -2.29087 | 1.74789  | 1.54023  |
| C  | -1.56356 | 3.93385  | -1.49739 |
| H  | 0.13309  | 2.66946  | -1.06052 |
| H  | -0.85099 | 2.07866  | -2.39248 |
| H  | -2.30022 | 4.29142  | 1.6539   |
| H  | -3.4005  | 3.7118   | 0.39417  |
| H  | -0.98712 | 4.59338  | -2.1605  |
| H  | -2.58389 | 3.85372  | -1.93247 |
| C  | 0.27593  | -2.37371 | -1.41122 |
| C  | 1.39656  | -2.09392 | 0.69737  |
| C  | 0.91914  | -3.74417 | -1.52777 |
| H  | 0.92301  | -1.6123  | -1.8749  |
| H  | -0.69973 | -2.34928 | -1.92221 |
| C  | 1.97194  | -3.48027 | 0.52788  |
| H  | 2.07122  | -1.35709 | 0.23938  |
| H  | 1.23866  | -1.80136 | 1.74585  |
| H  | 1.12607  | -3.97111 | -2.58313 |
| H  | 0.2264   | -4.53311 | -1.16204 |
| H  | 2.96549  | -3.53302 | 0.99261  |
| H  | 1.34088  | -4.24677 | 1.02565  |
| N  | -1.59927 | 1.68236  | -0.46119 |
| N  | 0.09777  | -1.95357 | -0.00397 |
| O  | 2.1384   | -3.80444 | -0.83817 |
| O  | -1.61768 | 4.55324  | -0.23642 |
| Cl | -0.55825 | -0.09156 | 2.56476  |
| C  | 1.853    | 1.29106  | 0.41625  |
| H  | 1.63404  | 0.91361  | 1.44172  |
| H  | 1.61554  | 2.38573  | 0.47685  |
| O  | 1.10615  | 0.6436   | -0.54284 |
| H  | -2.8328  | 1.15232  | -2.07362 |
| C  | 3.33804  | 1.17189  | 0.17551  |
| C  | 3.84423  | 0.41921  | -0.88796 |
| C  | 4.24404  | 1.81113  | 1.03292  |

|   |         |          |          |
|---|---------|----------|----------|
| C | 5.22125 | 0.30283  | -1.08698 |
| H | 3.13495 | -0.06911 | -1.56087 |
| C | 5.61671 | 1.69781  | 0.83567  |
| H | 3.86002 | 2.40461  | 1.86912  |
| C | 6.11314 | 0.94013  | -0.22757 |
| H | 5.5993  | -0.29087 | -1.9239  |
| H | 6.30731 | 2.20212  | 1.51695  |
| H | 7.19111 | 0.85019  | -0.38303 |

C<sub>H1</sub>

|    |          |          |          |
|----|----------|----------|----------|
| Ni | 0.20268  | -0.18432 | 0.16462  |
| C  | 2.17543  | 1.74784  | -0.6965  |
| C  | 0.28193  | 2.69141  | 0.3118   |
| C  | 2.73513  | 3.00818  | -0.90504 |
| C  | 0.77411  | 3.98185  | 0.12135  |
| C  | 2.01868  | 4.13142  | -0.49105 |
| H  | 3.71017  | 3.10606  | -1.38633 |
| H  | 0.19583  | 4.84856  | 0.44726  |
| H  | 2.43232  | 5.13002  | -0.64807 |
| C  | 2.76552  | 0.43588  | -1.12404 |
| H  | 3.84346  | 0.55027  | -1.3423  |
| C  | -1.00753 | 2.32311  | 0.98359  |
| H  | -0.77378 | 2.01409  | 2.01858  |
| H  | -1.68173 | 3.19676  | 1.03819  |
| N  | 0.98771  | 1.63457  | -0.09698 |
| C  | 3.25141  | -0.46595 | 1.10094  |
| C  | 2.63077  | -1.9643  | -0.66269 |
| C  | 4.6951   | -0.88186 | 0.90022  |
| H  | 2.77405  | -1.09743 | 1.86398  |
| H  | 3.16989  | 0.56822  | 1.47052  |
| C  | 4.09012  | -2.33513 | -0.82159 |
| H  | 2.17019  | -2.65051 | 0.0682   |
| H  | 2.05925  | -2.03959 | -1.59905 |
| H  | 5.23518  | -0.8662  | 1.85704  |
| H  | 5.22534  | -0.17789 | 0.22284  |
| H  | 4.19437  | -3.38383 | -1.13272 |
| H  | 4.56834  | -1.71565 | -1.61063 |
| C  | -2.11438 | 1.442    | -1.0221  |
| C  | -2.69172 | 0.55171  | 1.12947  |
| C  | -3.38286 | 2.26947  | -0.98612 |
| H  | -2.33673 | 0.47645  | -1.497   |
| H  | -1.3192  | 1.91275  | -1.62014 |
| C  | -3.94903 | 1.39419  | 1.09886  |
| H  | -2.90923 | -0.43391 | 0.69181  |

|    |          |          |          |
|----|----------|----------|----------|
| H  | -2.31827 | 0.37574  | 2.14812  |
| H  | -3.78374 | 2.39859  | -2.00124 |
| H  | -3.18716 | 3.28903  | -0.58857 |
| H  | -4.76857 | 0.87455  | 1.61416  |
| H  | -3.79721 | 2.35957  | 1.62768  |
| N  | 2.46094  | -0.60387 | -0.13439 |
| N  | -1.60505 | 1.14738  | 0.33022  |
| O  | -4.38091 | 1.63178  | -0.22457 |
| O  | 4.78666  | -2.19583 | 0.39691  |
| Cl | 0.22104  | -0.50146 | 2.44932  |
| C  | -0.85654 | -1.43692 | -2.27087 |
| H  | -0.423   | -2.26509 | -2.88754 |
| H  | -1.5109  | -0.88775 | -2.99541 |
| O  | 0.12789  | -0.65545 | -1.73239 |
| H  | 2.25457  | 0.13368  | -2.05428 |
| C  | -1.76858 | -2.07744 | -1.24458 |
| C  | -3.15347 | -2.17224 | -1.43118 |
| C  | -1.23485 | -2.55172 | -0.03904 |
| C  | -3.97525 | -2.7257  | -0.44946 |
| H  | -3.59304 | -1.79039 | -2.35887 |
| C  | -2.0503  | -3.08821 | 0.95654  |
| H  | -0.15065 | -2.51148 | 0.12352  |
| C  | -3.4264  | -3.18101 | 0.7513   |
| H  | -5.05442 | -2.78344 | -0.6136  |
| H  | -1.60443 | -3.41697 | 1.89791  |
| H  | -4.07178 | -3.5983  | 1.52795  |

O-TS<sub>H</sub>

|    |          |          |          |
|----|----------|----------|----------|
| Ni | 0.28009  | -0.16053 | 0.59385  |
| C  | 0.43499  | -2.52893 | -1.02522 |
| C  | 2.52998  | -1.70701 | -0.41468 |
| C  | 1.01514  | -3.55388 | -1.75503 |
| C  | 3.17054  | -2.69294 | -1.145   |
| C  | 2.39728  | -3.62559 | -1.8197  |
| H  | 0.39168  | -4.2736  | -2.26889 |
| H  | 4.25137  | -2.73187 | -1.17784 |
| H  | 2.87325  | -4.40972 | -2.3943  |
| C  | -1.03768 | -2.27934 | -0.92365 |
| H  | -1.59131 | -3.21219 | -1.07265 |
| C  | 3.22479  | -0.67855 | 0.42878  |
| H  | 3.28778  | -1.05344 | 1.45526  |
| H  | 4.25686  | -0.54563 | 0.08772  |
| N  | 1.19691  | -1.6402  | -0.38229 |
| C  | -1.37814 | -2.50795 | 1.505    |

|    |          |          |          |
|----|----------|----------|----------|
| C  | -2.66295 | -0.88771 | 0.27076  |
| C  | -2.59877 | -3.4024  | 1.52847  |
| H  | -1.36445 | -1.87518 | 2.39485  |
| H  | -0.45951 | -3.09945 | 1.49988  |
| C  | -3.83713 | -1.83644 | 0.33126  |
| H  | -2.69075 | -0.19591 | 1.11603  |
| H  | -2.67551 | -0.30417 | -0.64994 |
| H  | -2.62047 | -3.98707 | 2.44865  |
| H  | -2.58427 | -4.11659 | 0.69033  |
| H  | -4.77378 | -1.28052 | 0.37331  |
| H  | -3.87326 | -2.47554 | -0.56421 |
| C  | 2.57341  | 1.34156  | -0.78389 |
| C  | 2.85204  | 1.446    | 1.59447  |
| C  | 3.93112  | 1.99045  | -0.93987 |
| H  | 1.80112  | 2.11163  | -0.75907 |
| H  | 2.34618  | 0.68412  | -1.62522 |
| C  | 4.20602  | 2.08082  | 1.37364  |
| H  | 2.08722  | 2.21929  | 1.68101  |
| H  | 2.82516  | 0.86822  | 2.5183   |
| H  | 3.94524  | 2.62638  | -1.82495 |
| H  | 4.72201  | 1.23653  | -1.07178 |
| H  | 4.43341  | 2.78338  | 2.17522  |
| H  | 5.00344  | 1.32211  | 1.36722  |
| N  | -1.36946 | -1.59756 | 0.33948  |
| N  | 2.45223  | 0.57273  | 0.47495  |
| O  | 4.23442  | 2.81948  | 0.16493  |
| O  | -3.79012 | -2.64528 | 1.49512  |
| Cl | -0.35873 | 0.80083  | 2.52373  |
| C  | -0.94309 | 1.237    | -2.07342 |
| H  | 0.04994  | 1.67061  | -2.31827 |
| H  | -0.23512 | 0.64114  | -0.73391 |
| O  | -1.39498 | 0.30248  | -2.75625 |
| C  | -1.83712 | 2.21371  | -1.38013 |
| C  | -3.21333 | 2.14743  | -1.57334 |
| C  | -1.31531 | 3.22063  | -0.57315 |
| C  | -4.05336 | 3.06371  | -0.96046 |
| H  | -3.60379 | 1.36903  | -2.2191  |
| C  | -2.15016 | 4.1356   | 0.04083  |
| H  | -0.24287 | 3.26323  | -0.40729 |
| C  | -3.5244  | 4.05765  | -0.15007 |
| H  | -5.12374 | 3.00659  | -1.11765 |
| H  | -1.7348  | 4.90539  | 0.67929  |
| H  | -4.18007 | 4.77129  | 0.33322  |
| H  | -1.32062 | -1.59856 | -1.73539 |

B<sub>2</sub>-TS1-1

|    |          |          |          |
|----|----------|----------|----------|
| Ni | 0.35164  | 0.15654  | -0.51361 |
| C  | 3.18372  | 0.02188  | 0.32794  |
| C  | 2.46397  | -1.82861 | -0.88305 |
| C  | 4.46426  | -0.5013  | 0.43464  |
| C  | 3.71477  | -2.41972 | -0.79419 |
| C  | 4.72348  | -1.73916 | -0.13147 |
| H  | 5.23778  | 0.0499   | 0.95337  |
| H  | 3.89304  | -3.38826 | -1.2429  |
| H  | 5.71247  | -2.17343 | -0.05739 |
| C  | 2.74433  | 1.31089  | 0.95891  |
| H  | 3.61653  | 1.94641  | 1.14626  |
| C  | 1.30301  | -2.4149  | -1.62842 |
| H  | 1.29204  | -1.97416 | -2.62922 |
| H  | 1.43404  | -3.49552 | -1.7422  |
| N  | 2.23058  | -0.64146 | -0.32293 |
| C  | 2.26835  | 2.67979  | -1.00766 |
| C  | 0.9306   | 2.94929  | 0.95552  |
| C  | 3.0268   | 3.9298   | -0.62225 |
| H  | 1.43659  | 2.93653  | -1.66289 |
| H  | 2.89826  | 1.98691  | -1.56676 |
| C  | 1.72778  | 4.18974  | 1.29394  |
| H  | 0.06866  | 3.23681  | 0.34788  |
| H  | 0.56178  | 2.45145  | 1.85308  |
| H  | 3.34127  | 4.4688   | -1.51605 |
| H  | 3.93696  | 3.69272  | -0.05006 |
| H  | 1.10088  | 4.92037  | 1.80613  |
| H  | 2.56418  | 3.94801  | 1.96818  |
| C  | -0.23584 | -2.83181 | 0.22436  |
| C  | -1.12834 | -2.19647 | -1.90328 |
| C  | -0.60911 | -4.26831 | -0.07659 |
| H  | -1.07359 | -2.3567  | 0.73699  |
| H  | 0.63468  | -2.77263 | 0.88003  |
| C  | -1.4744  | -3.64527 | -2.15154 |
| H  | -1.97189 | -1.69113 | -1.42682 |
| H  | -0.9057  | -1.65888 | -2.82473 |
| H  | -0.88617 | -4.78532 | 0.84382  |
| H  | 0.23486  | -4.82155 | -0.51542 |
| H  | -2.38183 | -3.72603 | -2.74959 |
| H  | -0.671   | -4.15534 | -2.70392 |
| N  | 1.69963  | 1.97593  | 0.16286  |
| N  | 0.02471  | -2.04256 | -0.99399 |

|    |          |          |          |
|----|----------|----------|----------|
| O  | -1.73011 | -4.33401 | -0.9347  |
| O  | 2.21584  | 4.82034  | 0.12494  |
| Cl | 0.60326  | 0.56656  | -2.8537  |
| H  | -1.19468 | 0.62887  | -0.51696 |
| H  | 2.3033   | 1.0749   | 1.93082  |
| C  | -2.15772 | -0.03391 | 1.79268  |
| H  | -2.99352 | -0.6956  | 1.97429  |
| C  | -2.26842 | 1.00264  | 0.88218  |
| H  | -1.55249 | 1.80716  | 0.97034  |
| C  | -3.49745 | 1.35737  | 0.17738  |
| C  | -3.58973 | 2.5972   | -0.46327 |
| C  | -4.59637 | 0.49636  | 0.09881  |
| C  | -4.73316 | 2.96702  | -1.1468  |
| H  | -2.73622 | 3.26523  | -0.43087 |
| C  | -5.7412  | 0.86523  | -0.58477 |
| H  | -4.54764 | -0.47909 | 0.56744  |
| C  | -5.81722 | 2.10246  | -1.20934 |
| H  | -4.77823 | 3.93068  | -1.63877 |
| H  | -6.57966 | 0.18151  | -0.6349  |
| H  | -6.71181 | 2.38698  | -1.74866 |
| O  | 0.18768  | -0.02639 | 1.66037  |
| C  | -0.86356 | -0.41484 | 2.24733  |
| N  | -0.74551 | -1.28366 | 3.30243  |
| C  | 0.514    | -1.90552 | 3.6167   |
| H  | 0.81671  | -1.68435 | 4.64366  |
| H  | 0.45174  | -2.99459 | 3.51842  |
| H  | 1.27674  | -1.52993 | 2.94049  |
| C  | -1.88795 | -1.72743 | 4.05946  |
| H  | -2.63016 | -0.93565 | 4.13498  |
| H  | -2.36752 | -2.61099 | 3.62019  |
| H  | -1.57249 | -1.99053 | 5.06896  |

B<sub>2</sub>-TS2-1

|    |          |          |          |
|----|----------|----------|----------|
| Ni | 0.87455  | 0.46034  | -1.22948 |
| C  | -0.448   | -0.22334 | 1.16015  |
| C  | 1.66462  | -1.2785  | 1.13706  |
| C  | -0.7902  | -0.91561 | 2.34057  |
| C  | 1.37355  | -1.98375 | 2.30032  |
| C  | 0.11779  | -1.80093 | 2.8948   |
| H  | -1.76037 | -0.72668 | 2.80516  |
| H  | 2.1367   | -2.62869 | 2.73803  |
| H  | -0.13574 | -2.33859 | 3.81207  |
| C  | -1.33689 | 0.64397  | 0.43523  |
| H  | -2.18365 | 1.03637  | 1.01941  |

|    |          |          |          |
|----|----------|----------|----------|
| C  | 3.00912  | -1.35673 | 0.47238  |
| H  | 3.16697  | -2.37193 | 0.06428  |
| H  | 2.98541  | -0.67426 | -0.41038 |
| N  | 0.76755  | -0.44966 | 0.57609  |
| C  | 0.04857  | 2.69561  | 0.39519  |
| C  | -1.43651 | 2.25363  | -1.4372  |
| C  | -0.96084 | 3.69117  | 0.92579  |
| H  | 0.76499  | 3.19585  | -0.27664 |
| H  | 0.62856  | 2.23144  | 1.2076   |
| C  | -2.39982 | 3.26836  | -0.85623 |
| H  | -0.74254 | 2.75544  | -2.13147 |
| H  | -1.9576  | 1.46926  | -2.0009  |
| H  | -0.45224 | 4.5178   | 1.4405   |
| H  | -1.62988 | 3.20483  | 1.66648  |
| H  | -2.94464 | 3.78386  | -1.65935 |
| H  | -3.15555 | 2.76245  | -0.21936 |
| C  | 4.00233  | 0.1759   | 2.11652  |
| C  | 5.40221  | -1.20134 | 0.76367  |
| C  | 4.3653   | 1.36171  | 1.24388  |
| H  | 4.70469  | 0.12535  | 2.9663   |
| H  | 2.99438  | 0.29109  | 2.54589  |
| C  | 5.72809  | 0.01951  | -0.08272 |
| H  | 6.16211  | -1.29605 | 1.55844  |
| H  | 5.44149  | -2.12428 | 0.16308  |
| H  | 4.38413  | 2.29303  | 1.82856  |
| H  | 3.6212   | 1.49421  | 0.43115  |
| H  | 6.74927  | -0.03883 | -0.4861  |
| H  | 5.03631  | 0.10054  | -0.94645 |
| N  | -0.61768 | 1.6215   | -0.38664 |
| N  | 4.0926   | -1.09886 | 1.40242  |
| O  | 5.6586   | 1.19237  | 0.69923  |
| O  | -1.71658 | 4.25674  | -0.1203  |
| Cl | 2.48647  | 1.7148   | -2.0879  |
| H  | -2.93368 | -2.71914 | -0.04183 |
| H  | -1.91775 | -0.24832 | -0.50897 |
| C  | -1.08685 | -1.64656 | -1.85448 |
| O  | -0.23954 | -0.79475 | -2.28145 |
| C  | -2.38248 | -1.17948 | -1.44571 |
| H  | -2.78942 | -0.46495 | -2.17172 |
| C  | -3.42343 | -1.96569 | -0.67814 |
| H  | -4.10625 | -2.53309 | -1.34102 |
| C  | -4.25358 | -1.06949 | 0.20982  |
| C  | -4.90092 | 0.06045  | -0.30966 |
| C  | -4.3677  | -1.31881 | 1.58204  |



|   |          |          |          |
|---|----------|----------|----------|
| C | -5.62446 | 0.91789  | 0.51636  |
| H | -4.83278 | 0.2767   | -1.38055 |
| C | -5.08976 | -0.46313 | 2.41482  |
| H | -3.87103 | -2.19739 | 2.00605  |
| C | -5.71685 | 0.66323  | 1.88544  |
| H | -6.11978 | 1.79373  | 0.08922  |
| H | -5.16088 | -0.67765 | 3.48424  |
| H | -6.28056 | 1.33721  | 2.53437  |
| N | -0.65073 | -2.93423 | -1.66927 |
| C | -1.51134 | -4.09133 | -1.73378 |
| H | -2.51398 | -3.81546 | -2.072   |
| H | -1.11013 | -4.81074 | -2.46554 |
| H | -1.59598 | -4.61634 | -0.76736 |
| C | 0.76295  | -3.21688 | -1.74735 |
| H | 1.07224  | -3.5327  | -2.75838 |
| H | 1.3361   | -2.31993 | -1.49204 |
| H | 1.02114  | -4.02071 | -1.04153 |

O<sub>2</sub>-TS<sub>L</sub>-1

|    |          |          |          |
|----|----------|----------|----------|
| C  | -1.28067 | 1.76904  | 1.14277  |
| H  | -0.82651 | 1.7676   | 2.13226  |
| C  | -2.59689 | 1.09343  | 1.17632  |
| C  | -2.74667 | -0.012   | 2.01966  |
| C  | -3.70274 | 1.53742  | 0.45446  |
| C  | -3.95955 | -0.67096 | 2.11581  |
| H  | -1.88048 | -0.36809 | 2.57197  |
| C  | -4.91612 | 0.87374  | 0.54986  |
| H  | -3.61027 | 2.40659  | -0.18178 |
| C  | -5.04839 | -0.23555 | 1.37283  |
| H  | -4.05276 | -1.533   | 2.76518  |
| H  | -5.76579 | 1.229    | -0.02043 |
| H  | -5.99709 | -0.75339 | 1.44074  |
| H  | -0.4677  | 0.52182  | 0.69095  |
| Ni | 0.56918  | -0.58184 | 0.25537  |
| C  | 1.52981  | -2.60054 | -1.42389 |
| C  | 3.16043  | -1.51623 | -0.14321 |
| C  | 2.47122  | -3.46083 | -1.95824 |
| C  | 4.15313  | -2.32674 | -0.66122 |
| C  | 3.79638  | -3.31717 | -1.56743 |
| H  | 2.17835  | -4.2179  | -2.67357 |
| H  | 5.18242  | -2.19414 | -0.35515 |
| H  | 4.55345  | -3.97333 | -1.97602 |
| C  | 0.09322  | -2.49112 | -1.80699 |
| H  | -0.31401 | -3.4557  | -2.11532 |

|    |          |          |          |
|----|----------|----------|----------|
| C  | 3.30314  | -0.44568 | 0.88313  |
| H  | 3.13459  | -0.88897 | 1.86997  |
| H  | 4.29868  | 0.00393  | 0.86807  |
| N  | 1.88906  | -1.67854 | -0.52762 |
| C  | -1.16384 | -2.8875  | 0.26959  |
| C  | -1.92276 | -1.21008 | -1.28252 |
| C  | -2.20528 | -3.82451 | -0.30078 |
| H  | -1.57086 | -2.33921 | 1.11771  |
| H  | -0.29206 | -3.42511 | 0.6421   |
| C  | -2.91537 | -2.21216 | -1.82315 |
| H  | -2.38503 | -0.64942 | -0.47547 |
| H  | -1.61602 | -0.48501 | -2.03385 |
| H  | -2.57952 | -4.46975 | 0.49432  |
| H  | -1.78098 | -4.48443 | -1.07276 |
| H  | -3.81399 | -1.69176 | -2.15449 |
| H  | -2.51299 | -2.75553 | -2.69227 |
| C  | 2.44503  | 1.45759  | -0.45097 |
| C  | 2.09164  | 1.4052   | 1.92618  |
| C  | 3.57388  | 2.44154  | -0.21811 |
| H  | 1.5105   | 2.00112  | -0.61372 |
| H  | 2.63716  | 0.84736  | -1.33463 |
| C  | 3.25416  | 2.35523  | 2.08217  |
| H  | 1.18302  | 1.99162  | 1.80545  |
| H  | 1.95719  | 0.73989  | 2.779    |
| H  | 3.62888  | 3.14231  | -1.05202 |
| H  | 4.5438   | 1.92462  | -0.16492 |
| H  | 3.0949   | 3.00053  | 2.94538  |
| H  | 4.20015  | 1.81933  | 2.24449  |
| N  | -0.71045 | -1.86215 | -0.71728 |
| N  | 2.21323  | 0.5613   | 0.71286  |
| O  | 3.37031  | 3.20578  | 0.95102  |
| O  | -3.31978 | -3.1305  | -0.82452 |
| Cl | 0.72127  | -1.60374 | 2.72162  |
| H  | 0.02137  | -1.83113 | -2.67609 |
| C  | -0.89913 | 2.83739  | 0.34672  |
| H  | -0.11615 | 3.47425  | 0.74106  |
| C  | -1.15735 | 2.91603  | -1.07709 |
| O  | -1.61824 | 1.96871  | -1.72552 |
| N  | -0.78643 | 4.08576  | -1.71359 |
| C  | -0.77122 | 4.13897  | -3.15176 |
| H  | -1.20976 | 3.22485  | -3.53976 |
| H  | -1.34622 | 4.99331  | -3.51704 |
| H  | 0.24955  | 4.23513  | -3.53834 |
| C  | -0.23094 | 5.2226   | -1.02282 |

|   |          |         |          |
|---|----------|---------|----------|
| H | -0.37454 | 6.11478 | -1.63157 |
| H | -0.7323  | 5.39081 | -0.07191 |
| H | 0.84543  | 5.12291 | -0.83184 |

CL-1

|    |          |          |          |
|----|----------|----------|----------|
| Ni | -0.26311 | 0.20018  | 0.22212  |
| C  | -2.98387 | 0.44952  | 0.52784  |
| C  | -1.90371 | 2.35958  | -0.34324 |
| C  | -4.21915 | 1.10333  | 0.51064  |
| C  | -3.08756 | 3.07195  | -0.33999 |
| C  | -4.25647 | 2.43134  | 0.10317  |
| H  | -5.11597 | 0.56007  | 0.80322  |
| H  | -3.10949 | 4.10631  | -0.68857 |
| H  | -5.20515 | 2.97044  | 0.09423  |
| C  | -2.69581 | -0.90097 | 1.08999  |
| H  | -3.52361 | -1.58358 | 0.839    |
| C  | -0.57188 | 2.79194  | -0.86697 |
| H  | -0.50876 | 2.562    | -1.94434 |
| H  | -0.42415 | 3.88125  | -0.77754 |
| N  | -1.88111 | 1.08624  | 0.11695  |
| C  | -1.51336 | -2.03988 | -0.76231 |
| C  | -0.76342 | -2.35644 | 1.52748  |
| C  | -2.17858 | -3.39501 | -0.66877 |
| H  | -0.49534 | -2.14542 | -1.16651 |
| H  | -2.12666 | -1.38878 | -1.40625 |
| C  | -1.49337 | -3.68414 | 1.52425  |
| H  | 0.28107  | -2.49316 | 1.22135  |
| H  | -0.74458 | -1.89993 | 2.52796  |
| H  | -2.15557 | -3.87921 | -1.65325 |
| H  | -3.24676 | -3.27294 | -0.40553 |
| H  | -0.98094 | -4.38962 | 2.19364  |
| H  | -2.52822 | -3.56318 | 1.90892  |
| C  | 0.8282   | 2.53685  | 1.15712  |
| C  | 1.75916  | 1.98634  | -0.99078 |
| C  | 1.59028  | 3.84514  | 1.10429  |
| H  | 1.44052  | 1.7614   | 1.64359  |
| H  | -0.10781 | 2.64133  | 1.72681  |
| C  | 2.46618  | 3.32445  | -0.98526 |
| H  | 2.40197  | 1.22853  | -0.52163 |
| H  | 1.52367  | 1.65177  | -2.01158 |
| H  | 1.89467  | 4.13898  | 2.11794  |
| H  | 0.94734  | 4.66296  | 0.71573  |
| H  | 3.4218   | 3.24479  | -1.52029 |
| H  | 1.86704  | 4.10231  | -1.50467 |

|    |          |          |          |
|----|----------|----------|----------|
| N  | -1.37644 | -1.39253 | 0.58197  |
| N  | 0.5087   | 2.01611  | -0.19841 |
| O  | 2.75856  | 3.7309   | 0.33195  |
| O  | -1.505   | -4.24578 | 0.24065  |
| Cl | -2.29805 | 3.59179  | -2.99524 |
| C  | 1.96333  | -1.34984 | -0.43268 |
| H  | 1.72621  | -1.02651 | -1.4792  |
| H  | 1.5924   | -2.40602 | -0.39313 |
| O  | 1.39311  | -0.54398 | 0.52131  |
| H  | -2.60972 | -0.82408 | 2.18797  |
| C  | 3.47027  | -1.40233 | -0.32379 |
| C  | 4.15634  | -0.61457 | 0.60346  |
| C  | 4.20634  | -2.24593 | -1.16588 |
| C  | 5.54931  | -0.66469 | 0.6845   |
| H  | 3.57706  | 0.02968  | 1.26936  |
| C  | 5.59438  | -2.298   | -1.0859  |
| H  | 3.6782   | -2.87284 | -1.89198 |
| C  | 6.27314  | -1.5047  | -0.1585  |
| H  | 6.07226  | -0.04465 | 1.41747  |
| H  | 6.15302  | -2.96304 | -1.74946 |
| H  | 7.36297  | -1.5458  | -0.0933  |

CL-2

|    |          |          |          |
|----|----------|----------|----------|
| Ni | -0.54136 | -0.02609 | -0.19795 |
| C  | -3.29023 | 0.03859  | -0.43182 |
| C  | -2.38981 | -2.0067  | 0.28045  |
| C  | -4.57738 | -0.45292 | -0.326   |
| C  | -3.65297 | -2.5603  | 0.37725  |
| C  | -4.75255 | -1.76878 | 0.08029  |
| H  | -5.42401 | 0.17599  | -0.56529 |
| H  | -3.77231 | -3.58766 | 0.69379  |
| H  | -5.75041 | -2.17841 | 0.16416  |
| C  | -2.88302 | 1.37502  | -0.95732 |
| H  | -3.6136  | 2.14647  | -0.70611 |
| C  | -1.09867 | -2.64656 | 0.64814  |
| H  | -0.94262 | -2.46195 | 1.71684  |
| H  | -1.10749 | -3.72385 | 0.46958  |
| N  | -2.24562 | -0.73585 | -0.11803 |
| C  | -1.55989 | 2.42515  | 0.8354   |
| C  | -0.8193  | 2.61398  | -1.4586  |
| C  | -2.10149 | 3.8315   | 0.72342  |
| H  | -0.54027 | 2.44112  | 1.21852  |
| H  | -2.13167 | 1.81137  | 1.53071  |
| C  | -1.41951 | 4.00076  | -1.48912 |

|      |          |          |          |
|------|----------|----------|----------|
| H    | 0.22497  | 2.65342  | -1.1554  |
| H    | -0.85296 | 2.13973  | -2.43962 |
| H    | -2.01039 | 4.33162  | 1.68724  |
| H    | -3.1692  | 3.83595  | 0.45823  |
| H    | -0.84771 | 4.63837  | -2.16329 |
| H    | -2.4562  | 3.97955  | -1.86084 |
| C    | 0.19653  | -2.42837 | -1.45232 |
| C    | 1.31248  | -2.15891 | 0.6636   |
| C    | 0.76581  | -3.83104 | -1.52856 |
| H    | 0.87918  | -1.72183 | -1.92784 |
| H    | -0.76644 | -2.37125 | -1.9634  |
| C    | 1.81303  | -3.57623 | 0.53107  |
| H    | 2.02451  | -1.47508 | 0.20315  |
| H    | 1.1606   | -1.85708 | 1.70039  |
| H    | 0.96749  | -4.09074 | -2.5681  |
| H    | 0.04552  | -4.56952 | -1.14443 |
| H    | 2.78897  | -3.66949 | 1.00602  |
| H    | 1.13891  | -4.29245 | 1.02307  |
| N    | -1.51183 | 1.72916  | -0.48749 |
| N    | 0.02569  | -1.95926 | -0.05176 |
| O    | 1.98557  | -3.93664 | -0.8314  |
| O    | -1.37456 | 4.60337  | -0.21334 |
| Cl   | -0.18495 | -1.16561 | -3.31995 |
| C    | 1.88317  | 1.16119  | 0.43846  |
| H    | 1.65631  | 0.6958   | 1.41479  |
| H    | 1.64004  | 2.23423  | 0.58431  |
| O    | 1.1468   | 0.59348  | -0.58451 |
| H    | -2.84971 | 1.32528  | -2.04901 |
| C    | 3.36918  | 1.06676  | 0.19787  |
| C    | 3.88781  | 0.34023  | -0.86762 |
| C    | 4.25674  | 1.70361  | 1.06449  |
| C    | 5.26035  | 0.24733  | -1.061   |
| H    | 3.19633  | -0.14538 | -1.54543 |
| C    | 5.62428  | 1.61224  | 0.87397  |
| H    | 3.86359  | 2.27492  | 1.89921  |
| C    | 6.13373  | 0.88099  | -0.19224 |
| H    | 5.64768  | -0.32318 | -1.89714 |
| H    | 6.29856  | 2.1124   | 1.55897  |
| H    | 7.20383  | 0.8097   | -0.34245 |
| CL-3 |          |          |          |
| Ni   | -0.54136 | -0.02609 | -0.19795 |
| C    | -3.29023 | 0.03859  | -0.43182 |
| C    | -2.38981 | -2.0067  | 0.28045  |

|    |          |          |          |
|----|----------|----------|----------|
| C  | -4.57738 | -0.45292 | -0.326   |
| C  | -3.65297 | -2.5603  | 0.37725  |
| C  | -4.75255 | -1.76878 | 0.08029  |
| H  | -5.42401 | 0.17599  | -0.56529 |
| H  | -3.77231 | -3.58766 | 0.69379  |
| H  | -5.75041 | -2.17841 | 0.16416  |
| C  | -2.88302 | 1.37502  | -0.95732 |
| H  | -3.6136  | 2.14647  | -0.70611 |
| C  | -1.09867 | -2.64656 | 0.64814  |
| H  | -0.94262 | -2.46195 | 1.71684  |
| H  | -1.10749 | -3.72385 | 0.46958  |
| N  | -2.24562 | -0.73585 | -0.11803 |
| C  | -1.55989 | 2.42515  | 0.8354   |
| C  | -0.8193  | 2.61398  | -1.4586  |
| C  | -2.10149 | 3.8315   | 0.72342  |
| H  | -0.54027 | 2.44112  | 1.21852  |
| H  | -2.13167 | 1.81137  | 1.53071  |
| C  | -1.41951 | 4.00076  | -1.48912 |
| H  | 0.22497  | 2.65342  | -1.1554  |
| H  | -0.85296 | 2.13973  | -2.43962 |
| H  | -2.01039 | 4.33162  | 1.68724  |
| H  | -3.1692  | 3.83595  | 0.45823  |
| H  | -0.84771 | 4.63837  | -2.16329 |
| H  | -2.4562  | 3.97955  | -1.86084 |
| C  | 0.19653  | -2.42837 | -1.45232 |
| C  | 1.31248  | -2.15891 | 0.6636   |
| C  | 0.76581  | -3.83104 | -1.52856 |
| H  | 0.87918  | -1.72183 | -1.92784 |
| H  | -0.76644 | -2.37125 | -1.9634  |
| C  | 1.81303  | -3.57623 | 0.53107  |
| H  | 2.02451  | -1.47508 | 0.20315  |
| H  | 1.1606   | -1.85708 | 1.70039  |
| H  | 0.96749  | -4.09074 | -2.5681  |
| H  | 0.04552  | -4.56952 | -1.14443 |
| H  | 2.78897  | -3.66949 | 1.00602  |
| H  | 1.13891  | -4.29245 | 1.02307  |
| N  | -1.51183 | 1.72916  | -0.48749 |
| N  | 0.02569  | -1.95926 | -0.05176 |
| O  | 1.98557  | -3.93664 | -0.8314  |
| O  | -1.37456 | 4.60337  | -0.21334 |
| Cl | -5.69291 | 2.84068  | -1.8183  |
| C  | 1.88317  | 1.16119  | 0.43846  |
| H  | 1.65631  | 0.6958   | 1.41479  |
| H  | 1.64004  | 2.23423  | 0.58431  |

|   |          |          |          |
|---|----------|----------|----------|
| O | 1.1468   | 0.59348  | -0.58451 |
| H | -2.84971 | 1.32528  | -2.04901 |
| C | 3.36918  | 1.06676  | 0.19787  |
| C | 3.88781  | 0.34023  | -0.86762 |
| C | 4.25674  | 1.70361  | 1.06449  |
| C | 5.26035  | 0.24733  | -1.061   |
| H | 3.19633  | -0.14538 | -1.54543 |
| C | 5.62428  | 1.61224  | 0.87397  |
| H | 3.86359  | 2.27492  | 1.89921  |
| C | 6.13373  | 0.88099  | -0.19224 |
| H | 5.64768  | -0.32318 | -1.89714 |
| H | 6.29856  | 2.1124   | 1.55897  |
| H | 7.20383  | 0.8097   | -0.34245 |
